# Supplementary material for: Phylogenomic analysis and revised classification of atypoid mygalomorph spiders (Araneae, Mygalomorphae), with notes on arachnid ultraconserved element loci
Source: PubMed Central journal article supplement (PMC6501763; doi:10.7717/peerj.6864), 2019-05-03

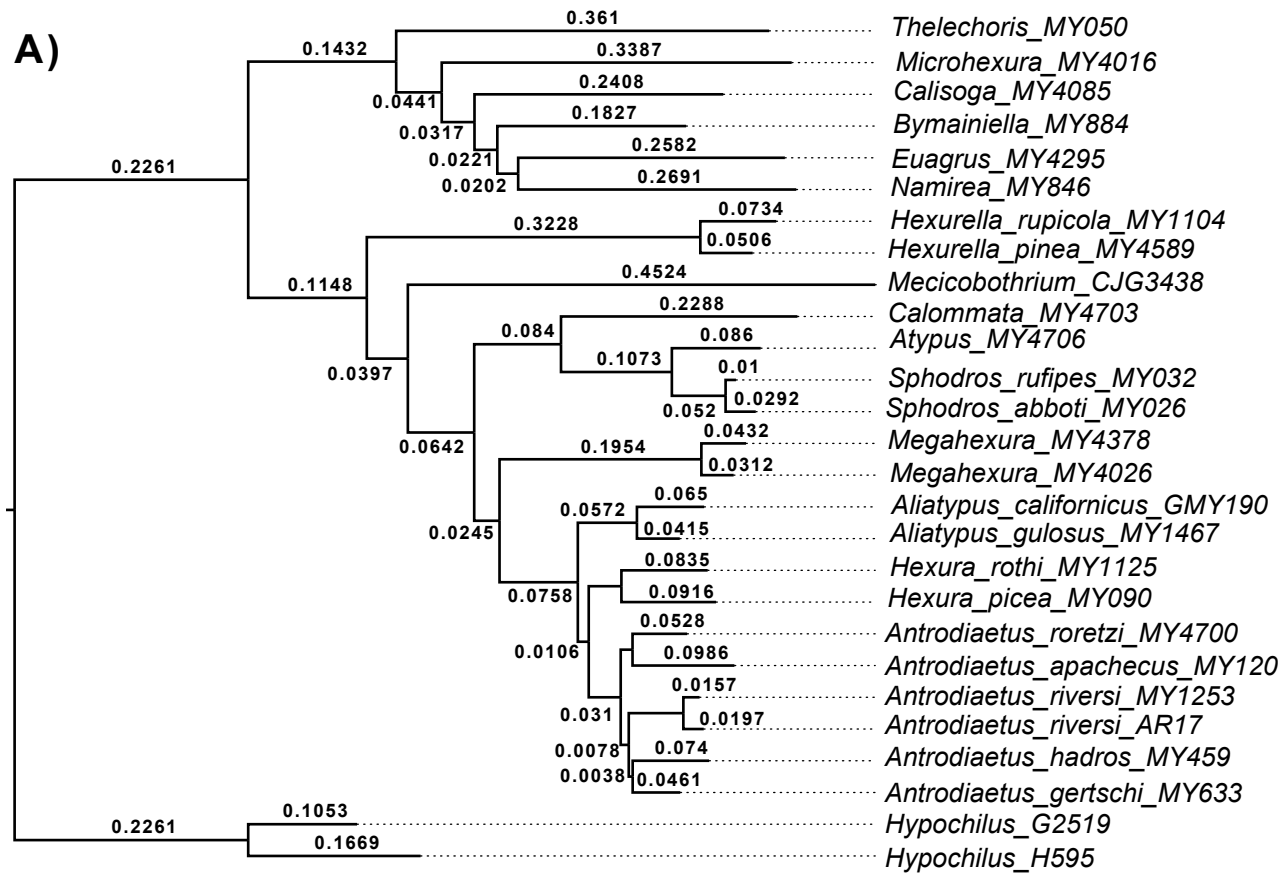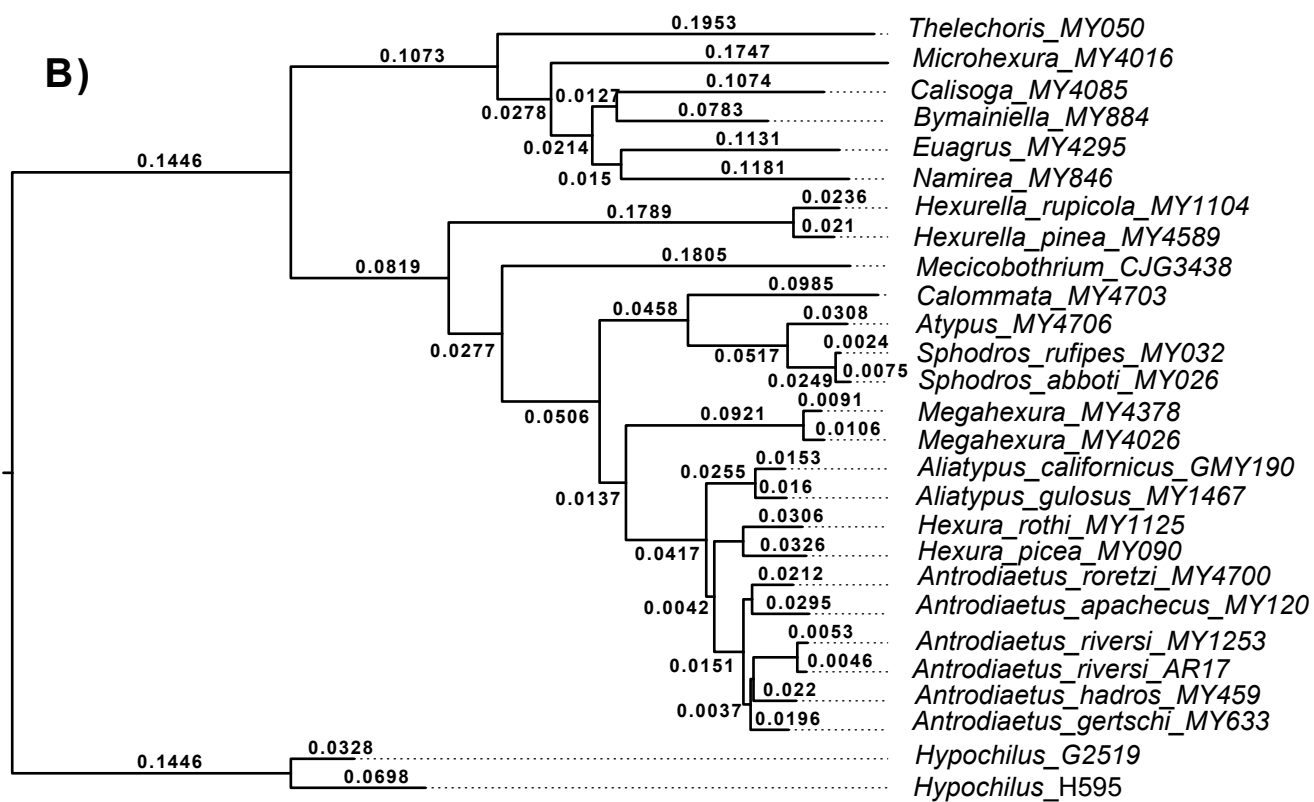

Supplement: peerj-07-6864-s004.pdf [file peerj-07-6864-s004.pdf]
