# Supplementary material for: Phylogenomic analysis and revised classification of atypoid mygalomorph spiders (Araneae, Mygalomorphae), with notes on arachnid ultraconserved element loci
Source: PeerJ. 2019 May 3;7:e6864. doi: 10.7717/peerj.6864 (PMC6501763; doi:10.7717/peerj.6864)
Supplement: Table S2 — Categories for each locus (e.g., duplicate protein, paralogy evident, etc.) grouped by cell color as explained in file. [file peerj-07-6864-s002.xlsx]

## Sheet: Sheet1
same protein (dupllicate UCE locus)
potential paralogy		divergent BIT scores in case of potential paralogy
not in Atypoid matrix, but annotation applies
no annotation	ctl = ORF confirmed, in filtered matrix
Name	Notes	Accession	Bitscore	Local Database - Description
uce-29	paralogs	XP_022256992.1	76.6406	E3 ubiquitin-protein ligase SH3RF1-like [Limulus polyphemus]
uce-29		XP_002416605.1	77.0258	conserved hypothetical protein, partial [Ixodes scapularis]
uce-29		XP_013792496.1	77.0258	SH3 domain-containing RING finger protein 3-like, partial [Limulus polyphemus]
uce-29		XP_021001466.1	105.916	SH3 domain-containing RING finger protein 3 [Parasteatoda tepidariorum]
uce-38	no annotation
uce-44	ctl	KFM67287.1	49.2914	Dihydrolipoyllysine-residue acetyltransferase component of pyruvate dehydrogenase complex, mitochondrial, partial [Stegodyphus mimosarum]
uce-44		XP_015928646.1	49.2914	dihydrolipoyllysine-residue acetyltransferase component of pyruvate dehydrogenase complex, mitochondrial-like isoform X1 [Parasteatoda tepidariorum]
uce-44		XP_015926187.1	102.449	dihydrolipoyllysine-residue succinyltransferase component of 2-oxoglutarate dehydrogenase complex, mitochondrial [Parasteatoda tepidariorum]
uce-44		XP_002410203.1	105.916	dihydrolipoamide acetyltransferase, putative, partial [Ixodes scapularis]
uce-44		XP_022245658.1	106.301	dihydrolipoyllysine-residue succinyltransferase component of 2-oxoglutarate dehydrogenase complex, mitochondrial-like [Limulus polyphemus]
uce-44		KFM56835.1	112.849	Dihydrolipoyllysine-residue succinyltransferase component of 2-oxoglutarate dehydrogenase complex, mitochondrial, partial [Stegodyphus mimosarum]
uce-47	ctl	XP_002399358.1	83.5741	RAB GTPase-activating protein, putative, partial [Ixodes scapularis]
uce-47		XP_013788270.1	104.375	small G protein signaling modulator 3 homolog [Limulus polyphemus]
uce-47		XP_021002015.1	107.071	small G protein signaling modulator 3 homolog [Parasteatoda tepidariorum]
uce-67	ctl	XP_002433752.1	68.5514	AP-2 complex subunit alpha-1, putative [Ixodes scapularis]
uce-67		KFM77968.1	68.5514	AP-2 complex subunit alpha-2, partial [Stegodyphus mimosarum]
uce-67		XP_015930612.1	68.5514	AP-2 complex subunit alpha-2-like [Parasteatoda tepidariorum]
uce-67		XP_002405858.1	67.781	AP-2 complex subunit alpha-1, putative [Ixodes scapularis]
uce-67		XP_013773927.1	67.3958	AP-2 complex subunit alpha-like [Limulus polyphemus]
uce-67		XP_022254663.1	66.2402	AP-2 complex subunit alpha-like [Limulus polyphemus]
uce-68		XP_013773927.1	65.855	AP-2 complex subunit alpha-like [Limulus polyphemus]
uce-68		KFM77968.1	70.0922	AP-2 complex subunit alpha-2, partial [Stegodyphus mimosarum]
uce-68		XP_015930612.1	70.0922	AP-2 complex subunit alpha-2-like [Parasteatoda tepidariorum]
uce-69		XP_022254663.1	88.5817	AP-2 complex subunit alpha-like [Limulus polyphemus]
uce-69		XP_013773927.1	89.3521	AP-2 complex subunit alpha-like [Limulus polyphemus]
uce-69		XP_015930612.1	89.7373	AP-2 complex subunit alpha-2-like [Parasteatoda tepidariorum]
uce-69		KFM77968.1	90.5077	AP-2 complex subunit alpha-2, partial [Stegodyphus mimosarum]
uce-78	paralogs	XP_022243934.1	96.6709	voltage-dependent calcium channel type A subunit alpha-1-like isoform X1 [Limulus polyphemus]
uce-78		XP_015920161.1	95.1301	voltage-dependent calcium channel type A subunit alpha-1 isoform X1 [Parasteatoda tepidariorum]
uce-78		XP_022239684.1	94.7449	voltage-dependent calcium channel type A subunit alpha-1-like isoform X9 [Limulus polyphemus]
uce-78		XP_021002012.1	93.2041	voltage-dependent calcium channel type A subunit alpha-1-like [Parasteatoda tepidariorum]
uce-78		XP_022254974.1	90.8929	voltage-dependent calcium channel type A subunit alpha-1-like [Limulus polyphemus]
uce-78		KFM77335.1	76.2554	Voltage-dependent calcium channel type A subunit alpha-1, partial [Stegodyphus mimosarum]
uce-78		XP_002400373.1	70.0922	voltage-gated calcium channel, putative [Ixodes scapularis]
uce-78		XP_022254424.1	69.707	voltage-dependent calcium channel type D subunit alpha-1-like, partial [Limulus polyphemus]
uce-78		XP_013793722.2	68.9366	muscle calcium channel subunit alpha-1-like [Limulus polyphemus]
uce-78		XP_013782455.2	68.9366	muscle calcium channel subunit alpha-1-like, partial [Limulus polyphemus]
uce-78		XP_022247943.1	68.5514	muscle calcium channel subunit alpha-1-like isoform X1 [Limulus polyphemus]
uce-78		KFM70351.1	68.5514	Voltage-dependent calcium channel type D subunit alpha-1, partial [Stegodyphus mimosarum]
uce-78		KFM70205.1	67.3958	Muscle calcium channel subunit alpha-1, partial [Stegodyphus mimosarum]
uce-78		XP_021004541.1	65.855	muscle calcium channel subunit alpha-1-like [Parasteatoda tepidariorum]
uce-78		XP_020999916.1	65.0846	muscle calcium channel subunit alpha-1 [Parasteatoda tepidariorum]
uce-81	paralogs	XP_015910896.1	124.79	E3 ubiquitin-protein ligase KCMF1 isoform X1 [Parasteatoda tepidariorum]
uce-81		KFM75862.1	124.02	E3 ubiquitin-protein ligase KCMF1, partial [Stegodyphus mimosarum]
uce-81		XP_002413560.1	112.849	conserved hypothetical protein, partial [Ixodes scapularis]
uce-81		XP_022250635.1	112.464	E3 ubiquitin-protein ligase KCMF1-like isoform X1 [Limulus polyphemus]
uce-81		XP_013785369.2	111.309	E3 ubiquitin-protein ligase KCMF1-like [Limulus polyphemus]
uce-81		XP_022250636.1	96.2857	E3 ubiquitin-protein ligase KCMF1-like isoform X2 [Limulus polyphemus]
uce-101	ctl	XP_022258113.1	107.457	NAD kinase-like [Limulus polyphemus]
uce-101		XP_022256168.1	108.997	NAD kinase-like isoform X1 [Limulus polyphemus]
uce-101		XP_021003518.1	108.997	NAD kinase [Parasteatoda tepidariorum]
uce-101		KFM72467.1	108.997	hypothetical protein X975_06244, partial [Stegodyphus mimosarum]
uce-127	ctl	XP_013786427.1	88.5817	LOW QUALITY PROTEIN: SWI/SNF complex subunit SMARCC2-like [Limulus polyphemus]
uce-127		XP_015907902.1	89.3521	SWI/SNF complex subunit SMARCC2-like isoform X2 [Parasteatoda tepidariorum]
uce-127		KFM58241.1	89.7373	SWI/SNF complex subunit SMARCC2, partial [Stegodyphus mimosarum]
uce-127		XP_015907833.1	89.7373	SWI/SNF complex subunit SMARCC2-like isoform X1 [Parasteatoda tepidariorum]
uce-128	ctl	XP_013790258.1	124.79	60S ribosomal protein L17-like [Limulus polyphemus]
uce-128		XP_015925007.2	125.176	60S ribosomal protein L17, partial [Parasteatoda tepidariorum]
uce-128		KFM78563.1	135.576	60S ribosomal protein L17, partial [Stegodyphus mimosarum]
uce-131	ctl	XP_013794091.2	157.532	BTB/POZ domain-containing protein kctd15-like [Limulus polyphemus]
uce-131		XP_015919811.1	159.073	BTB/POZ domain-containing protein kctd15-like isoform X1 [Parasteatoda tepidariorum]
uce-131		XP_022254679.1	159.458	BTB/POZ domain-containing protein kctd15-like isoform X1 [Limulus polyphemus]
uce-131		KFM76027.1	161.77	hypothetical protein X975_15091, partial [Stegodyphus mimosarum]
uce-149	paralogs	KFM82286.1	120.939	Transmembrane protein 184B, partial [Stegodyphus mimosarum]
uce-149		XP_013775847.1	120.168	transmembrane protein 184B-like [Limulus polyphemus]
uce-149		XP_015928750.1	118.627	transmembrane protein 184B-like [Parasteatoda tepidariorum]
uce-149		XP_002416205.1	115.161	transmembrane protein 184B, putative, partial [Ixodes scapularis]
uce-149		XP_015921420.1	114.39	transmembrane protein 184B isoform X1 [Parasteatoda tepidariorum]
uce-174	ctl	XP_013777158.1	58.151	CCR4-NOT transcription complex subunit 1-like, partial [Limulus polyphemus]
uce-174		KFM57954.1	61.6178	CCR4-NOT transcription complex subunit 1, partial [Stegodyphus mimosarum]
uce-174		XP_022241734.1	65.4698	CCR4-NOT transcription complex subunit 1-like [Limulus polyphemus]
uce-174		XP_015926722.2	65.855	CCR4-NOT transcription complex subunit 1-like [Parasteatoda tepidariorum]
uce-186	ctl	XP_022249518.1	107.457	filamin-A-like isoform X1 [Limulus polyphemus]
uce-200	ctl	KFM65976.1	62.3882	RING-box protein 2, partial [Stegodyphus mimosarum]
uce-200		XP_013782127.1	83.9593	RING-box protein 2-like [Limulus polyphemus]
uce-200		XP_015917383.1	85.1149	RING-box protein 2-like [Parasteatoda tepidariorum]
uce-201	ctl	XP_013782139.1	128.642	catalase-like isoform X1 [Limulus polyphemus
uce-201		XP_015931113.1	134.42	catalase-like [Parasteatoda tepidariorum]
uce-204	ctl	XP_021004247.1	106.686	coatomer subunit beta [Parasteatoda tepidariorum]
uce-204		XP_021002834.1	106.686	coatomer subunit beta-like [Parasteatoda tepidariorum]
uce-204		KFM74111.1	103.605	Coatomer subunit beta, partial [Stegodyphus mimosarum]
uce-204		XP_002400032.1	100.138	coatomer beta subunit, putative, partial [Ixodes scapularis]
uce-204		XP_013782107.1	99.3673	coatomer subunit beta-like [Limulus polyphemus]
uce-210	ctl	XP_015907390.1	99.3673	chloride intracellular channel exc-4 [Parasteatoda tepidariorum]
uce-210		KFM82250.1	99.3673	Chloride intracellular channel exc-4, partial [Stegodyphus mimosarum]
uce-210		XP_013773995.1	106.686	chloride intracellular channel exc-4-like [Limulus polyphemus]
uce-212	no annotation
uce-217	ctl	XP_013793765.1	143.28	methionine aminopeptidase 2-like [Limulus polyphemus]
uce-217		KFM57623.1	143.665	Methionine aminopeptidase 2, partial [Stegodyphus mimosarum]
uce-217		XP_015920292.1	153.295	methionine aminopeptidase 2-like [Parasteatoda tepidariorum]
uce-221	ctl	XP_015917274.1	105.916	son of sevenless homolog 2-like isoform X1 [Parasteatoda tepidariorum]
uce-221		XP_022239325.1	106.301	son of sevenless homolog 2-like isoform X1 [Limulus polyphemus]
uce-221		KFM57794.1	107.842	Son of sevenless-like protein, partial [Stegodyphus mimosarum]
uce-222		XP_015917274.1	120.168	son of sevenless homolog 2-like isoform X1 [Parasteatoda tepidariorum]
uce-222		XP_022239325.1	124.79	son of sevenless homolog 2-like isoform X1 [Limulus polyphemus]
uce-229	ctl	XP_022256328.1	108.227	protein unc-13 homolog B-like [Limulus polyphemus]
uce-229		KFM78555.1	109.383	Protein unc-13-like protein, partial [Stegodyphus mimosarum]
uce-229		XP_022240315.1	110.538	protein unc-13 homolog B-like isoform X1 [Limulus polyphemus]
uce-229		XP_015913825.1	115.931	protein unc-13 homolog B-like [Parasteatoda tepidariorum]
uce-231	ctl	XP_021003319.1	88.9669	cell division cycle and apoptosis regulator protein 1, partial [Parasteatoda tepidariorum]
uce-231		KFM61373.1	93.9745	hypothetical protein X975_10461, partial [Stegodyphus mimosarum]
uce-231		XP_013773988.1	115.931	cell division cycle and apoptosis regulator protein 1-like [Limulus polyphemus]
uce-233		XP_022252177.1	72.0182	integrator complex subunit 3-like isoform X1 [Limulus polyphemus]
uce-233		KFM81552.1	72.7886	Integrator complex subunit 3, partial [Stegodyphus mimosarum]
uce-233		XP_015906102.1	73.1738	integrator complex subunit 3-like [Parasteatoda tepidariorum]
uce-235	ctl	KFM77789.1	137.887	N-acyl-phosphatidylethanolamine-hydrolyzing phospholipase D, partial [Stegodyphus mimosarum]
uce-235		XP_015919071.1	132.109	N-acyl-phosphatidylethanolamine-hydrolyzing phospholipase D [Parasteatoda tepidariorum]
uce-235		XP_022249637.1	118.242	N-acyl-phosphatidylethanolamine-hydrolyzing phospholipase D-like isoform X1 [Limulus polyphemus]
uce-235		XP_002435470.1	90.5077	N-acyl-phosphatidylethanolamine-hydrolyzing phospholipase D, putative [Ixodes scapularis]
uce-251	ctl	XP_021003946.1	57.3806	cullin-3-A-like [Parasteatoda tepidariorum]
uce-251		XP_013789108.1	57.3806	cullin-3-A-like isoform X1 [Limulus polyphemus]
uce-251		XP_013775043.1	57.3806	cullin-3-like [Limulus polyphemus]
uce-251		KFM81912.1	57.3806	Cullin-3-A, partial [Stegodyphus mimosarum]
uce-251		XP_022240593.1	59.3066	cullin-2-like isoform X1 [Limulus polyphemus]
uce-251		XP_022256681.1	60.8474	cullin-2-like [Limulus polyphemus]
uce-251		XP_015918950.1	62.3882	cullin-2-like isoform X1 [Parasteatoda tepidariorum]
uce-251		XP_015918259.1	88.9669	cullin-1 isoform X1 [Parasteatoda tepidariorum]
uce-251		XP_013794364.1	90.1225	cullin-1-like [Limulus polyphemus]
uce-251		KFM75968.1	90.1225	Cullin-1, partial [Stegodyphus mimosarum]
uce-266	ctl	KFM72733.1	133.265	E3 ubiquitin-protein ligase HERC2, partial [Stegodyphus mimosarum]
uce-266		XP_021002221.1	135.576	E3 ubiquitin-protein ligase HERC2 [Parasteatoda tepidariorum]
uce-266		XP_022244116.1	136.346	E3 ubiquitin-protein ligase HERC2-like isoform X1 [Limulus polyphemus]
uce-276	ctl	XP_013783576.1	94.3597	malignant T-cell-amplified sequence 1-like [Limulus polyphemus]
uce-276		KFM63305.1	98.5969	Malignant T-cell-amplified sequence 1, partial [Stegodyphus mimosarum]
uce-276		XP_021004062.1	100.138	malignant T-cell-amplified sequence 1 [Parasteatoda tepidariorum]
uce-279	paralogs	XP_015927082.1	112.464	sodium channel protein para-like [Parasteatoda tepidariorum]
uce-279		XP_015931258.2	109.383	LOW QUALITY PROTEIN: sodium channel protein para [Parasteatoda tepidariorum]
uce-279		XP_022256534.1	108.997	sodium channel protein para-like isoform X6 [Limulus polyphemus]
uce-279		XP_022243694.1	107.457	sodium channel protein para-like isoform X2 [Limulus polyphemus]
uce-279		KFM68614.1	105.531	Sodium channel protein para, partial [Stegodyphus mimosarum]
uce-279		XP_002407119.1	105.145	skeletal muscle sodium channel alpha subunit, putative, partial [Ixodes scapularis]
uce-279		XP_022238292.1	102.064	sodium channel protein para-like isoform X1 [Limulus polyphemus]
uce-279		XP_022252047.1	65.855	sodium channel protein 60E-like [Limulus polyphemus]
uce-283	ctl	XP_013777822.1	105.531	SWI/SNF-related matrix-associated actin-dependent regulator of chromatin subfamily B member 1-like [Limulus polyphemus]
uce-283		KFM71304.1	107.457	SWI/SNF-related matrix-associated actin-dependent regulator of chromatin subfamily B member 1, partial [Stegodyphus mimosarum]
uce-283		XP_015910230.1	107.457	SWI/SNF-related matrix-associated actin-dependent regulator of chromatin subfamily B member 1-A-like isoform X2 [Parasteatoda tepidariorum]
uce-296	paralogs	XP_021000639.1	178.718	NACHT and WD repeat domain-containing protein 2 [Parasteatoda tepidariorum]
uce-296		XP_022238264.1	173.326	NACHT and WD repeat domain-containing protein 2-like [Limulus polyphemus]
uce-302	ctl	XP_022241856.1	149.443	uncharacterized protein LOC106459621 isoform X1 [Limulus polyphemus]
uce-302		KFM63337.1	159.844	Protein-methionine sulfoxide oxidase MICAL3, partial [Stegodyphus mimosarum]
uce-302		XP_015926308.1	164.851	uncharacterized protein LOC107453849 [Parasteatoda tepidariorum]
uce-314	ctl	KFM65062.1	130.183	Pumilio-like protein, partial [Stegodyphus mimosarum]
uce-314		XP_013786730.1	138.658	pumilio homolog 2-like [Limulus polyphemus]
uce-314		XP_022255403.1	139.043	pumilio homolog 2-like isoform X1 [Limulus polyphemus]
uce-314		XP_015926793.1	147.517	pumilio homolog 2 isoform X1 [Parasteatoda tepidariorum]
uce-315		XP_022255403.1	99.3673	pumilio homolog 2-like isoform X1 [Limulus polyphemus]
uce-315		KFM79738.1	98.9821	Pumilio-like protein, partial [Stegodyphus mimosarum]
uce-315		XP_015926793.1	98.9821	pumilio homolog 2 isoform X1 [Parasteatoda tepidariorum]
uce-315		XP_015926794.1	97.4413	pumilio homolog 2 isoform X2 [Parasteatoda tepidariorum]
uce-315		XP_022255464.1	97.0561	pumilio homolog 2-like [Limulus polyphemus]
uce-315		XP_013786730.1	95.5153	pumilio homolog 2-like [Limulus polyphemus]
uce-330	ctl	XP_015908739.1	66.2402	YEATS domain-containing protein 4-like [Parasteatoda tepidariorum]
uce-330		KFM59185.1	74.7146	YEATS domain-containing protein 4, partial [Stegodyphus mimosarum]
uce-330		XP_013778979.1	83.9593	YEATS domain-containing protein 4-like isoform X1 [Limulus polyphemus]
uce-334	ctl	XP_022237867.1	87.8113	cleft lip and palate transmembrane protein 1-like protein [Limulus polyphemus]
uce-334		KFM77446.1	117.472	Cleft lip and palate transmembrane protein 1-like protein, partial [Stegodyphus mimosarum]
uce-334		XP_013783202.1	117.857	cleft lip and palate transmembrane protein 1 homolog [Limulus polyphemus]
uce-334		XP_015910862.1	121.324	cleft lip and palate transmembrane protein 1 homolog [Parasteatoda tepidariorum]
uce-335	ctl	KFM76417.1	108.612	Pleiotropic regulator 1, partial [Stegodyphus mimosarum]
uce-335		XP_015905360.1	108.997	pleiotropic regulator 1-like [Parasteatoda tepidariorum]
uce-335		XP_013780208.1	109.768	pleiotropic regulator 1-like [Limulus polyphemus]
uce-343	ctl	XP_021004059.1	115.161	probable ubiquitin carboxyl-terminal hydrolase FAF-X [Parasteatoda tepidariorum]
uce-343		KFM62543.1	119.783	putative ubiquitin carboxyl-terminal hydrolase FAF-X, partial [Stegodyphus mimosarum]
uce-343		XP_013784963.1	122.865	probable ubiquitin carboxyl-terminal hydrolase FAF-X, partial [Limulus polyphemus]
uce-343		XP_022248099.1	124.79	probable ubiquitin carboxyl-terminal hydrolase FAF-X isoform X1 [Limulus polyphemus]
uce-353	ctl	XP_015924999.1	114.005	calcium-binding mitochondrial carrier protein SCaMC-2 [Parasteatoda tepidariorum]
uce-353		XP_002415089.1	103.219	ADP/ATP translocase, putative, partial [Ixodes scapularis]
uce-353		XP_013786684.1	101.679	calcium-binding mitochondrial carrier protein SCaMC-2-like [Limulus polyphemus]
uce-353		XP_013786179.1	100.138	calcium-binding mitochondrial carrier protein SCaMC-1-B-like [Limulus polyphemus]
uce-353		XP_013771827.2	87.4261	calcium-binding mitochondrial carrier protein SCaMC-2-like [Limulus polyphemus]
uce-353		KFM73996.1	78.9518	Calcium-binding mitochondrial carrier protein SCaMC-2-A, partial [Stegodyphus mimosarum]
uce-360	ctl	XP_015925023.2	96.6709	ubiquitin carboxyl-terminal hydrolase 47 isoform X2 [Parasteatoda tepidariorum]
uce-360		XP_013783310.1	95.9005	ubiquitin carboxyl-terminal hydrolase 47-like isoform X1 [Limulus polyphemus]
uce-360		KFM79478.1	95.9005	Ubiquitin carboxyl-terminal hydrolase 47, partial [Stegodyphus mimosarum]
uce-361	paralogs	XP_013791182.1	162.925	putative ATP-dependent RNA helicase an3, partial [Limulus polyphemus]
uce-361		XP_013794766.1	160.999	ATP-dependent RNA helicase DDX3Y-like [Limulus polyphemus]
uce-361		KFM69414.1	160.614	hypothetical protein X975_24536, partial [Stegodyphus mimosarum]
uce-361		XP_015930968.1	160.614	putative ATP-dependent RNA helicase an3 [Parasteatoda tepidariorum]
uce-361		XP_015918000.1	159.458	ATP-dependent RNA helicase DDX3Y isoform X2 [Parasteatoda tepidariorum]
uce-361		XP_015918001.1	159.073	ATP-dependent RNA helicase DDX3Y isoform X3 [Parasteatoda tepidariorum]
uce-361		XP_002435863.1	157.918	DEAD box ATP-dependent RNA helicase, putative, partial [Ixodes scapularis]
uce-361		XP_013786642.2	154.066	ATP-dependent RNA helicase DDX3Y-like isoform X1 [Limulus polyphemus]
uce-361		XP_022252134.1	97.0561	probable ATP-dependent RNA helicase DDX4 [Limulus polyphemus]
uce-361		KFM80449.1	83.9593	putative ATP-dependent RNA helicase DDX4, partial [Stegodyphus mimosarum]
uce-361		XP_021004490.1	83.5741	probable ATP-dependent RNA helicase DDX4 [Parasteatoda tepidariorum]
uce-361		XP_002405949.1	78.5666	ATP-dependent RNA helicase, putative [Ixodes scapularis]
uce-361		XP_022243416.1	76.6406	ATP-dependent RNA helicase dbp2-like isoform X2 [Limulus polyphemus]
uce-361		XP_015921958.1	75.8702	ATP-dependent RNA helicase dbp2 [Parasteatoda tepidariorum]
uce-361		KFM66710.1	75.485	putative ATP-dependent RNA helicase DDX5, partial [Stegodyphus mimosarum]
uce-361		XP_013787310.1	75.0998	probable ATP-dependent RNA helicase DDX17 isoform X2 [Limulus polyphemus]
uce-361		KFM70435.1	72.4034	putative ATP-dependent RNA helicase DDX5, partial [Stegodyphus mimosarum]
uce-361		KFM71069.1	69.707	putative ATP-dependent RNA helicase an3, partial [Stegodyphus mimosarum]
uce-361		XP_015908394.1	67.0106	probable ATP-dependent RNA helicase DDX5 [Parasteatoda tepidariorum]
uce-364	paralogs	KFM58971.1	111.309	CTP synthase 1, partial [Stegodyphus mimosarum]
uce-364		XP_002400452.1	110.538	cytidine 5'-triphosphate synthase (CTPS), putative [Ixodes scapularis]
uce-364		XP_022241698.1	110.153	CTP synthase 1-like isoform X1 [Limulus polyphemus]
uce-364		XP_015907590.1	107.457	CTP synthase 1 isoform X3 [Parasteatoda tepidariorum]
uce-364		XP_022256317.1	105.531	CTP synthase 1-like isoform X2 [Limulus polyphemus]
uce-364		XP_022241699.1	100.908	CTP synthase 1-B-like isoform X2 [Limulus polyphemus]
uce-368		XP_013780706.1	124.02	probable ATP-dependent RNA helicase DDX46 isoform X1 [Limulus polyphemus]
uce-368		KFM56623.1	152.14	putative ATP-dependent RNA helicase DDX46, partial [Stegodyphus mimosarum]
uce-368		XP_015929320.1	158.303	probable ATP-dependent RNA helicase DDX46 isoform X1 [Parasteatoda tepidariorum]
uce-369	ctl	XP_013780706.1	95.5153	probable ATP-dependent RNA helicase DDX46 isoform X1 [Limulus polyphemus]
uce-369		KFM56623.1	97.0561	putative ATP-dependent RNA helicase DDX46, partial [Stegodyphus mimosarum]
uce-369		XP_015929320.1	98.5969	probable ATP-dependent RNA helicase DDX46 isoform X1 [Parasteatoda tepidariorum]
uce-370	ctl	XP_013783058.1	122.094	glycogen synthase kinase-3 beta-like isoform X1 [Limulus polyphemus]
uce-370		KFM74636.1	122.094	Glycogen synthase kinase-3 beta, partial [Stegodyphus mimosarum]
uce-370		XP_013780561.1	120.553	glycogen synthase kinase-3 beta-like isoform X1 [Limulus polyphemus]
uce-370		XP_013783067.1	119.783	glycogen synthase kinase-3 beta-like isoform X2 [Limulus polyphemus]
uce-370		XP_013792669.1	119.013	glycogen synthase kinase-3 beta-like, partial [Limulus polyphemus]
uce-370		XP_022248455.1	117.857	glycogen synthase kinase-3 beta-like isoform X2 [Limulus polyphemus]
uce-370		KFM81997.1	116.701	Glycogen synthase kinase-3 beta, partial [Stegodyphus mimosarum]
uce-370		XP_015912550.1	116.316	glycogen synthase kinase-3 beta [Parasteatoda tepidariorum]
uce-370		XP_002404827.1	115.161	conserved hypothetical protein [Ixodes scapularis]
uce-370		XP_015910135.1	106.301	glycogen synthase kinase-3 beta [Parasteatoda tepidariorum]
uce-382		XP_022238167.1	150.984	LOW QUALITY PROTEIN: E3 ubiquitin-protein ligase MYCBP2-like [Limulus polyphemus]
uce-382		XP_015909114.1	165.622	E3 ubiquitin-protein ligase MYCBP2 [Parasteatoda tepidariorum]
uce-382		KFM80169.1	171.014	putative E3 ubiquitin-protein ligase MYCBP2, partial [Stegodyphus mimosarum]
uce-383	ctl	XP_022238167.1	108.612	LOW QUALITY PROTEIN: E3 ubiquitin-protein ligase MYCBP2-like [Limulus polyphemus]
uce-383		XP_015909114.1	114.39	E3 ubiquitin-protein ligase MYCBP2 [Parasteatoda tepidariorum]
uce-383		KFM80170.1	115.161	putative E3 ubiquitin-protein ligase MYCBP2, partial [Stegodyphus mimosarum]
uce-384		KFM80171.1	95.1301	putative E3 ubiquitin-protein ligase MYCBP2, partial [Stegodyphus mimosarum]
uce-384		XP_015909114.1	95.1301	E3 ubiquitin-protein ligase MYCBP2 [Parasteatoda tepidariorum]
uce-384		XP_022238167.1	92.8189	LOW QUALITY PROTEIN: E3 ubiquitin-protein ligase MYCBP2-like [Limulus polyphemus]
uce-394	ctl	XP_013787544.1	63.929	signal-induced proliferation-associated 1-like protein 2 [Limulus polyphemus]
uce-394		XP_022239462.1	78.5666	signal-induced proliferation-associated 1-like protein 2 isoform X1 [Limulus polyphemus]
uce-394		KFM59861.1	78.9518	Signal-induced proliferation-associated 1-like protein 2, partial [Stegodyphus mimosarum]
uce-394		XP_021000601.1	83.5741	signal-induced proliferation-associated 1-like protein 1 [Parasteatoda tepidariorum]
uce-422	ctl	XP_015913768.2	137.502	phosphoenolpyruvate carboxykinase, cytosolic [GTP]-like [Parasteatoda tepidariorum]
uce-422		XP_013788949.1	136.346	phosphoenolpyruvate carboxykinase, cytosolic [GTP]-like [Limulus polyphemus]
uce-422		KFM82167.1	130.183	Phosphoenolpyruvate carboxykinase [GTP], mitochondrial, partial [Stegodyphus mimosarum]
uce-422		XP_013777483.1	127.102	phosphoenolpyruvate carboxykinase, cytosolic [GTP]-like isoform X1 [Limulus polyphemus]
uce-422		XP_002404830.1	117.857	phosphoenolpyruvate carboxykinase, putative, partial [Ixodes scapularis]
uce-437	ctl	XP_013777361.1	61.2326	uridine-cytidine kinase-like 1, partial [Limulus polyphemus]
uce-437		XP_013784056.1	111.309	LOW QUALITY PROTEIN: uracil phosphoribosyltransferase homolog [Limulus polyphemus]
uce-437		XP_013784477.1	112.464	uracil phosphoribosyltransferase homolog isoform X1 [Limulus polyphemus]
uce-437		KFM71484.1	117.472	Uracil phosphoribosyltransferase-like protein, partial [Stegodyphus mimosarum]
uce-437		XP_015922423.1	117.857	uracil phosphoribosyltransferase homolog [Parasteatoda tepidariorum]
uce-449		XP_013773325.1	77.7962	eukaryotic translation initiation factor 1 [Limulus polyphemus]
uce-449		KFM75109.1	89.3521	Protein translation factor SUI1-like protein, partial [Stegodyphus mimosarum]
uce-449		XP_015916319.1	89.7373	eukaryotic translation initiation factor 1 [Parasteatoda tepidariorum]
uce-450	ctl	XP_015916319.1	95.5153	eukaryotic translation initiation factor 1 [Parasteatoda tepidariorum]
uce-450		KFM75109.1	98.9821	Protein translation factor SUI1-like protein, partial [Stegodyphus mimosarum]
uce-450		XP_013773325.1	98.9821	eukaryotic translation initiation factor 1 [Limulus polyphemus]
uce-459	ctl	XP_022243881.1	115.161	formin-like protein CG32138 [Limulus polyphemus]
uce-459		XP_013783008.1	115.546	formin-like protein CG32138, partial [Limulus polyphemus]
uce-459		KFM72106.1	120.168	Formin-like protein, partial [Stegodyphus mimosarum]
uce-459		XP_021004591.1	121.324	formin-like protein CG32138 [Parasteatoda tepidariorum]
uce-463	paralogs	KFM56989.1	174.481	Brain tumor protein, partial [Stegodyphus mimosarum]
uce-463		XP_015910070.1	175.252	brain tumor protein-like [Parasteatoda tepidariorum]
uce-463		XP_015910069.1	175.252	brain tumor protein-like [Parasteatoda tepidariorum]
uce-463		XP_022245152.1	173.711	brain tumor protein-like [Limulus polyphemus]
uce-463		XP_013777602.1	173.711	brain tumor protein-like [Limulus polyphemus]
uce-463		XP_013794813.1	171.4	B-box type zinc finger protein ncl-1-like [Limulus polyphemus]
uce-463		XP_002405170.1	108.227	conserved hypothetical protein [Ixodes scapularis]
uce-463		XP_015915797.1	79.337	brain tumor protein [Parasteatoda tepidariorum]
uce-463		XP_002411459.1	77.411	xnf7, putative, partial [Ixodes scapularis]
uce-463		XP_022257387.1	77.0258	B-box type zinc finger protein ncl-1-like [Limulus polyphemus]
uce-463		KFM61352.1	77.0258	B-box type zinc finger protein ncl-1, partial [Stegodyphus mimosarum]
uce-463		XP_015905833.1	77.0258	B-box type zinc finger protein ncl-1-like [Parasteatoda tepidariorum]
uce-463		XP_022251350.1	75.8702	B-box type zinc finger protein ncl-1-like [Limulus polyphemus]
uce-463		XP_022235003.1	75.8702	B-box type zinc finger protein ncl-1-like isoform X3 [Limulus polyphemus]
uce-463		XP_022249890.1	74.3294	brain tumor protein-like isoform X3 [Limulus polyphemus]
uce-463		KFM59712.1	73.9442	B-box type zinc finger protein ncl-1, partial [Stegodyphus mimosarum]
uce-463		XP_022235002.1	73.559	B-box type zinc finger protein ncl-1-like isoform X2 [Limulus polyphemus]
uce-471		KFM66954.1	111.694	Brefeldin A-inhibited guanine nucleotide-exchange protein 2, partial [Stegodyphus mimosarum]
uce-471		XP_015926421.1	113.235	brefeldin A-inhibited guanine nucleotide-exchange protein 2 [Parasteatoda tepidariorum]
uce-472	ctl	XP_022248093.1	100.138	brefeldin A-inhibited guanine nucleotide-exchange protein 1-like isoform X1 [Limulus polyphemus]
uce-472		XP_015926421.1	105.531	brefeldin A-inhibited guanine nucleotide-exchange protein 2 [Parasteatoda tepidariorum]
uce-477	ctl	XP_013792283.1	76.6406	cAMP-dependent protein kinase type I-beta regulatory subunit-like, partial [Limulus polyphemus]
uce-477		XP_022254013.1	78.5666	cAMP-dependent protein kinase regulatory subunit-like [Limulus polyphemus]
uce-477		XP_015922609.1	83.5741	cAMP-dependent protein kinase regulatory subunit isoform X1 [Parasteatoda tepidariorum]
uce-477		XP_013775542.1	84.3445	cAMP-dependent protein kinase regulatory subunit-like isoform X1 [Limulus polyphemus]
uce-477		KFM66810.1	85.8853	cAMP-dependent protein kinase regulatory subunit, partial [Stegodyphus mimosarum]
uce-482	ctl	XP_022243056.1	103.219	double-strand-break repair protein rad21 homolog isoform X2 [Limulus polyphemus]
uce-482		KFM78630.1	103.219	Double-strand-break repair protein rad21-like protein, partial [Stegodyphus mimosarum]
uce-482		XP_002412413.1	101.679	cohesin subunit rad21, putative [Ixodes scapularis]
uce-482		XP_021002880.1	98.2117	uncharacterized protein LOC107440639 [Parasteatoda tepidariorum]
uce-484	ctl	XP_022244978.1	60.8474	E3 ubiquitin-protein ligase RNF19B-like isoform X1 [Limulus polyphemus]
uce-484		KFM79244.1	64.3142	hypothetical protein X975_25889, partial [Stegodyphus mimosarum]
uce-484		XP_015912142.1	66.6254	E3 ubiquitin-protein ligase RNF19B isoform X1 [Parasteatoda tepidariorum]
uce-492	ctl	XP_022243206.1	120.939	ryanodine receptor-like [Limulus polyphemus]
uce-492		XP_022252763.1	126.331	ryanodine receptor-like, partial [Limulus polyphemus]
uce-492		KFM65083.1	130.183	Ryanodine receptor 44F, partial [Stegodyphus mimosarum]
uce-492		XP_021003691.1	137.887	ryanodine receptor [Parasteatoda tepidariorum]
uce-497		XP_013791273.1	116.316	uncharacterized protein KIAA1109-like, partial [Limulus polyphemus]
uce-497		KFM73890.1	131.724	hypothetical protein X975_01874, partial [Stegodyphus mimosarum]
uce-503	ctl	KFM74456.1	67.781	hypothetical protein X975_17516, partial [Stegodyphus mimosarum]
uce-503		XP_015927341.1	68.9366	cactin [Parasteatoda tepidariorum]
uce-503		XP_022257176.1	71.633	cactin-like [Limulus polyphemus]
uce-517	ctl	XP_022249642.1	83.5741	eukaryotic translation initiation factor 3 subunit D-like [Limulus polyphemus]
uce-517		XP_021000792.1	89.3521	eukaryotic translation initiation factor 3 subunit D [Parasteatoda tepidariorum]
uce-517		KFM56779.1	93.5893	Eukaryotic translation initiation factor 3 subunit D, partial [Stegodyphus mimosarum]
uce-527	ctl	XP_022251325.1	100.523	RNA-binding protein 42-like [Limulus polyphemus]
uce-527		XP_015917281.1	103.219	RNA-binding protein 42 isoform X1 [Parasteatoda tepidariorum]
uce-527		KFM66797.1	111.309	RNA-binding protein 42, partial [Stegodyphus mimosarum]
uce-538	same as uce 3644	XP_013789625.1	81.2629	YTH domain-containing family protein 2-like isoform X1 [Limulus polyphemus]
uce-538		XP_015905153.1	103.605	YTH domain-containing family protein 3-like [Parasteatoda tepidariorum]
uce-538		XP_013772448.1	107.071	YTH domain-containing family protein 3-like isoform X1 [Limulus polyphemus]
uce-538		KFM65587.1	108.612	YTH domain family protein 1, partial [Stegodyphus mimosarum]
uce-538		XP_022246635.1	110.538	YTH domain-containing family protein 2-like isoform X1 [Limulus polyphemus]
uce-541	ctl	XP_013784232.1	96.2857	4-hydroxyphenylpyruvate dioxygenase-like [Limulus polyphemus]
uce-541		KFM60386.1	102.449	4-hydroxyphenylpyruvate dioxygenase, partial [Stegodyphus mimosarum]
uce-541		XP_015905005.1	103.605	4-hydroxyphenylpyruvate dioxygenase [Parasteatoda tepidariorum]
uce-549	paralogs	XP_022243248.1	98.5969	regulating synaptic membrane exocytosis protein 2-like isoform X1 [Limulus polyphemus]
uce-549		XP_021001073.1	96.6709	regulating synaptic membrane exocytosis protein 1-like isoform X1 [Parasteatoda tepidariorum]
uce-549		XP_022239125.1	97.8265	regulating synaptic membrane exocytosis protein 2-like, partial [Limulus polyphemus]
uce-549		XP_022235193.1	94.3597	regulating synaptic membrane exocytosis protein 3-like [Limulus polyphemus]
uce-549		KFM66990.1	90.1225	Regulating synaptic membrane exocytosis protein 1, partial [Stegodyphus mimosarum]
uce-549		KFM73986.1	83.9593	Regulating synaptic membrane exocytosis protein 1, partial [Stegodyphus mimosarum]
uce-549		XP_002404598.1	78.1814	hypothetical protein IscW_ISCW000600 [Ixodes scapularis]
uce-549		XP_015920383.1	76.2554	regulating synaptic membrane exocytosis protein 2 isoform X2 [Parasteatoda tepidariorum]
uce-549		XP_015920376.1	76.2554	regulating synaptic membrane exocytosis protein 2 isoform X1 [Parasteatoda tepidariorum]
uce-559	paralogs	XP_013774384.1	70.0922	DNA-directed RNA polymerase III subunit RPC1-like [Limulus polyphemus]
uce-559		KFM81583.1	68.9366	DNA-directed RNA polymerase III subunit RPC1, partial [Stegodyphus mimosarum]
uce-559		XP_002408700.1	68.1662	DNA-directed RNA polymerase II largest subunit, putative [Ixodes scapularis]
uce-559		XP_015903993.1	68.1662	DNA-directed RNA polymerase III subunit RPC1-like [Parasteatoda tepidariorum]
uce-559		KFM60620.1	70.4774	DNA-directed RNA polymerase III subunit RPC1, partial [Stegodyphus mimosarum]
uce-559		XP_021002627.1	125.561	DNA-directed RNA polymerase I subunit RPA1-like [Parasteatoda tepidariorum]
uce-559		KFM65263.1	127.487	DNA-directed RNA polymerase I subunit RPA1, partial [Stegodyphus mimosarum]
uce-559		XP_002402573.1	133.65	DNA-directed RNA polymerase I largest subunit, putative, partial [Ixodes scapularis]
uce-559		XP_013793380.2	137.887	DNA-directed RNA polymerase I subunit RPA1-like [Limulus polyphemus]
uce-573	ctl	XP_015928118.1	184.496	DNA topoisomerase 2-alpha [Parasteatoda tepidariorum]
uce-573		XP_022251044.1	194.126	DNA topoisomerase 2-alpha-like [Limulus polyphemus]
uce-573		XP_013791562.1	198.364	DNA topoisomerase 2-alpha-like isoform X1 [Limulus polyphemus]
uce-573		KFM60640.1	207.223	DNA topoisomerase 2-beta, partial [Stegodyphus mimosarum]
uce-590	ctl	XP_022249203.1	120.553	myosin-VIIa-like, partial [Limulus polyphemus]
uce-590	same as uce 2938	XP_013772054.1	127.102	myosin-VIIa [Limulus polyphemus]
uce-590		KFM60334.1	127.487	Myosin-VIIa, partial [Stegodyphus mimosarum]
uce-590		XP_015927848.1	127.872	myosin-VIIa isoform X1 [Parasteatoda tepidariorum]
uce-594	paralogs	XP_022247312.1	144.821	AP-1 complex subunit gamma-1-like [Limulus polyphemus]
uce-594		XP_002433695.1	141.354	vesicle coat complex AP-3, delta subunit, putative [Ixodes scapularis]
uce-594		XP_015919278.1	136.732	AP-1 complex subunit gamma-1 [Parasteatoda tepidariorum]
uce-594		XP_022248680.1	135.576	AP-1 complex subunit gamma-1-like isoform X3 [Limulus polyphemus]
uce-594		XP_022248677.1	134.806	AP-1 complex subunit gamma-1-like isoform X1 [Limulus polyphemus]
uce-594		KFM78512.1	126.716	AP-1 complex subunit gamma-1, partial [Stegodyphus mimosarum]
uce-595	paralogs	KFM70514.1	129.798	Spectrin beta chain, partial [Stegodyphus mimosarum]
uce-595		XP_021003038.1	125.946	spectrin beta chain, partial [Parasteatoda tepidariorum]
uce-595		XP_022247638.1	122.865	spectrin beta chain-like, partial [Limulus polyphemus]
uce-595		XP_013777683.1	121.324	spectrin beta chain-like isoform X1 [Limulus polyphemus]
uce-595		XP_021002343.1	120.939	spectrin beta chain [Parasteatoda tepidariorum]
uce-595		KFM62398.1	118.627	Spectrin beta chain, partial [Stegodyphus mimosarum]
uce-595		XP_013782671.1	116.316	spectrin beta chain-like isoform X1 [Limulus polyphemus]
uce-595		XP_002411761.1	109.383	spectrin beta chain, putative [Ixodes scapularis]
uce-597	paralogs	XP_015930581.2	83.5741	spectrin beta chain-like, partial [Parasteatoda tepidariorum]
uce-597		KFM70514.1	88.1965	Spectrin beta chain, partial [Stegodyphus mimosarum]
uce-597		XP_013777683.1	103.99	spectrin beta chain-like isoform X1 [Limulus polyphemus]
uce-597		XP_022247638.1	108.997	spectrin beta chain-like, partial [Limulus polyphemus]
uce-597		XP_021002343.1	113.235	spectrin beta chain [Parasteatoda tepidariorum]
uce-597		KFM62398.1	114.005	Spectrin beta chain, partial [Stegodyphus mimosarum]
uce-612	paralogs	KFM64764.1	115.546	WD repeat-containing protein 47, partial [Stegodyphus mimosarum]
uce-612		XP_021001249.1	115.161	WD repeat-containing protein 47-like [Parasteatoda tepidariorum]
uce-612		XP_002435417.1	114.005	WD-repeat protein, putative [Ixodes scapularis]
uce-612		XP_022244469.1	112.079	WD repeat-containing protein 47-like [Limulus polyphemus]
uce-612		KFM69109.1	92.8189	WD repeat-containing protein 47, partial [Stegodyphus mimosarum]
uce-612		XP_021004248.1	92.8189	WD repeat-containing protein 47 [Parasteatoda tepidariorum]
uce-612		XP_022253242.1	89.3521	WD repeat-containing protein 47-like [Limulus polyphemus]
uce-612		XP_022235196.1	88.1965	WD repeat-containing protein 47-like isoform X2 [Limulus polyphemus]
uce-612		XP_022247486.1	80.8777	WD repeat-containing protein 47-like isoform X2 [Limulus polyphemus]
uce-612		XP_022239191.1	77.411	WD repeat-containing protein 47-like [Limulus polyphemus]
uce-628	ctl	XP_013792512.2	96.6709	ATP synthase subunit alpha, mitochondrial-like [Limulus polyphemus]
uce-628		XP_013783716.1	94.7449	ATP synthase subunit alpha, mitochondrial-like [Limulus polyphemus]
uce-628		KFM78517.1	94.7449	ATP synthase subunit alpha, mitochondrial, partial [Stegodyphus mimosarum]
uce-628		XP_002413266.1	93.9745	F0F1-type ATP synthase, alpha subunit, putative [Ixodes scapularis]
uce-628		XP_015922668.1	92.8189	ATP synthase subunit alpha, mitochondrial isoform X1 [Parasteatoda tepidariorum]
uce-628		XP_002408500.1	65.855	F0F1-type ATP synthase, alpha subunit, putative [Ixodes scapularis]
uce-629	ctl	XP_022249328.1	70.4774	leucine-rich repeat serine/threonine-protein kinase 1-like [Limulus polyphemus]
uce-629		XP_015925068.1	72.0182	leucine-rich repeat serine/threonine-protein kinase 1 isoform X1 [Parasteatoda tepidariorum]
uce-629		KFM57032.1	76.2554	Leucine-rich repeat serine/threonine-protein kinase 1, partial [Stegodyphus mimosarum]
uce-641	ctl	XP_013788362.1	66.2402	uncharacterized protein LOC106472278 isoform X1 [Limulus polyphemus]
uce-641		XP_022251991.1	95.9005	protein BCL9 homolog isoform X1 [Limulus polyphemus]
uce-641		XP_013785210.1	109.383	protein BCL9 homolog [Limulus polyphemus]
uce-641		KFM59870.1	143.665	Protein BCL9-like protein, partial [Stegodyphus mimosarum]
uce-641		XP_015903565.1	147.902	protein BCL9 homolog [Parasteatoda tepidariorum]
uce-666	ctl	XP_015918534.1	83.9593	60S ribosomal protein L23 [Parasteatoda tepidariorum]
uce-666		XP_013774082.1	81.6481	60S ribosomal protein L23 [Limulus polyphemus]
uce-666		KFM71204.1	79.7221	60S ribosomal protein L23, partial [Stegodyphus mimosarum]
uce-681	paralogs	XP_022258209.1	68.5514	uncharacterized protein LOC106474138, partial [Limulus polyphemus]
uce-681		XP_015907174.1	64.3142	uncharacterized protein LOC107439184 isoform X1 [Parasteatoda tepidariorum]
uce-682		KFM75841.1	76.2554	Transformation/transcription domain-associated protein, partial [Stegodyphus mimosarum]
uce-682		XP_021003106.1	76.2554	transformation/transcription domain-associated protein [Parasteatoda tepidariorum]
uce-682		XP_022242493.1	80.4925	transformation/transcription domain-associated protein-like [Limulus polyphemus]
uce-686		XP_022242493.1	95.1301	transformation/transcription domain-associated protein-like [Limulus polyphemus]
uce-686		KFM75841.1	90.1225	Transformation/transcription domain-associated protein, partial [Stegodyphus mimosarum]
uce-686		XP_021003106.1	90.1225	transformation/transcription domain-associated protein [Parasteatoda tepidariorum]
uce-687	ctl	KFM69694.1	77.411	Transformation/transcription domain-associated protein, partial [Stegodyphus mimosarum]
uce-687		XP_021003106.1	110.153	transformation/transcription domain-associated protein [Parasteatoda tepidariorum]
uce-687		XP_022242493.1	110.538	transformation/transcription domain-associated protein-like [Limulus polyphemus]
uce-689		XP_022242493.1	111.694	transformation/transcription domain-associated protein-like [Limulus polyphemus]
uce-689		KFM75843.1	111.694	Transformation/transcription domain-associated protein, partial [Stegodyphus mimosarum]
uce-689		XP_021003106.1	111.694	transformation/transcription domain-associated protein [Parasteatoda tepidariorum]
uce-694	ctl	XP_015930544.1	110.153	luc7-like protein 3 [Parasteatoda tepidariorum]
uce-694		KFM61900.1	109.768	Luc7-like protein 3, partial [Stegodyphus mimosarum]
uce-694		XP_013783290.1	107.457	luc7-like protein 3 [Limulus polyphemus]
uce-694		XP_022256653.1	105.531	luc7-like protein 3 isoform X1 [Limulus polyphemus]
uce-694		XP_002434553.1	99.7525	cisplatin resistance-associated overexpressed protein, putative, partial [Ixodes scapularis]
uce-747	ctl	XP_013784333.1	176.407	S-phase kinase-associated protein 1 [Limulus polyphemus]
uce-747		XP_015910563.1	177.563	S-phase kinase-associated protein 1 [Parasteatoda tepidariorum]
uce-747		KFM75314.1	182.185	S-phase kinase-associated protein 1, partial [Stegodyphus mimosarum]
uce-750	ctl	XP_013793034.2	116.316	striatin-3-like [Limulus polyphemus]
uce-750		XP_022248719.1	122.094	striatin-like isoform X1 [Limulus polyphemus]
uce-750		KFM63760.1	122.865	Striatin-3, partial [Stegodyphus mimosarum]
uce-750		XP_015919058.1	124.405	striatin-3 isoform X1 [Parasteatoda tepidariorum]
uce-752	ctl	XP_013787026.2	78.9518	GTP cyclohydrolase 1-like [Limulus polyphemus]
uce-752		XP_015911082.1	82.8037	GTP cyclohydrolase 1 isoform X1 [Parasteatoda tepidariorum]
uce-752		KFM68493.1	85.1149	GTP cyclohydrolase 1, partial [Stegodyphus mimosarum]
uce-753	paralogs	KFM82180.1	229.18	AP-2 complex subunit mu, partial [Stegodyphus mimosarum]
uce-753		XP_015919890.1	229.18	AP-2 complex subunit mu [Parasteatoda tepidariorum]
uce-753		XP_015919889.1	229.18	AP-2 complex subunit mu [Parasteatoda tepidariorum]
uce-753		XP_013784085.2	222.246	AP-2 complex subunit mu [Limulus polyphemus]
uce-753		XP_002412443.1	221.861	clathrin-adaptor protein, putative, partial [Ixodes scapularis]
uce-753		XP_013784812.1	211.075	AP-2 complex subunit mu-like [Limulus polyphemus]
uce-753		XP_015904820.1	137.887	AP-1 complex subunit mu-1 isoform X3 [Parasteatoda tepidariorum]
uce-753		KFM71138.1	90.5077	AP-3 complex subunit mu-1, partial [Stegodyphus mimosarum]
uce-753		XP_015919896.1	90.1225	AP-3 complex subunit mu-2 [Parasteatoda tepidariorum]
uce-753		XP_013786991.1	88.5817	AP-3 complex subunit mu-1 [Limulus polyphemus]
uce-753		XP_013793027.2	73.1738	AP-1 complex subunit mu-1-like [Limulus polyphemus]
uce-757	ctl	XP_022240544.1	74.7146	dedicator of cytokinesis protein 7-like isoform X2 [Limulus polyphemus]
uce-757		XP_015930029.2	79.7221	dedicator of cytokinesis protein 7-like [Parasteatoda tepidariorum]
uce-757		KFM57331.1	85.1149	Dedicator of cytokinesis protein 7, partial [Stegodyphus mimosarum]
uce-761	paralogs	XP_015931227.1	205.682	muscarinic acetylcholine receptor M2-like [Parasteatoda tepidariorum]
uce-761		XP_013772215.1	200.675	muscarinic acetylcholine receptor M2-like [Limulus polyphemus]
uce-761		XP_013788422.1	197.208	muscarinic acetylcholine receptor M5-like [Limulus polyphemus]
uce-761		XP_002416160.1	194.512	G-protein-linked acetylcholine receptor gar-2A, putative [Ixodes scapularis]
uce-761		XP_013780524.1	194.512	muscarinic acetylcholine receptor M3-like [Limulus polyphemus]
uce-761		XP_013777637.1	194.512	muscarinic acetylcholine receptor M2-like [Limulus polyphemus]
uce-761		XP_013777837.1	192.586	muscarinic acetylcholine receptor M2-like [Limulus polyphemus]
uce-761		XP_013786679.1	188.734	probable muscarinic acetylcholine receptor gar-2 [Limulus polyphemus]
uce-761		XP_015909634.1	84.3445	muscarinic acetylcholine receptor DM1-like [Parasteatoda tepidariorum]
uce-761		XP_022249259.1	82.4185	muscarinic acetylcholine receptor DM1-like [Limulus polyphemus]
uce-761		KFM67419.1	81.2629	Muscarinic acetylcholine receptor M5, partial [Stegodyphus mimosarum]
uce-761		XP_013781550.1	80.8777	muscarinic acetylcholine receptor DM1-like [Limulus polyphemus]
uce-761		XP_022251147.1	79.337	muscarinic acetylcholine receptor DM1-like [Limulus polyphemus]
uce-761		XP_022251143.1	79.337	muscarinic acetylcholine receptor DM1-like [Limulus polyphemus]
uce-761		XP_022251139.1	79.337	muscarinic acetylcholine receptor DM1-like [Limulus polyphemus]
uce-761		XP_013782550.1	79.337	muscarinic acetylcholine receptor DM1-like [Limulus polyphemus]
uce-761		XP_022257491.1	77.0258	muscarinic acetylcholine receptor DM1-like [Limulus polyphemus]
uce-761		KFM83634.1	76.6406	hypothetical protein X975_21077, partial [Stegodyphus mimosarum]
uce-761		XP_015911723.1	76.6406	muscarinic acetylcholine receptor M1-like [Parasteatoda tepidariorum]
uce-761		XP_013775403.1	75.8702	muscarinic acetylcholine receptor DM1-like [Limulus polyphemus]
uce-761		XP_013789766.1	75.0998	histamine H1 receptor-like [Limulus polyphemus]
uce-761		XP_015925366.1	73.559	histamine H1 receptor-like [Parasteatoda tepidariorum]
uce-761		XP_013779925.1	73.1738	histamine H1 receptor-like [Limulus polyphemus]
uce-761		XP_002403135.1	71.633	muscarinic acetylcholine receptor, putative [Ixodes scapularis]
uce-761		XP_013789076.2	70.4774	histamine H1 receptor-like [Limulus polyphemus]
uce-761		XP_013787558.2	69.707	histamine H1 receptor-like [Limulus polyphemus]
uce-761		XP_013776219.1	69.707	dopamine receptor 1-like [Limulus polyphemus]
uce-761		XP_013791385.1	68.5514	beta-2 adrenergic receptor-like [Limulus polyphemus]
uce-761		XP_013787099.1	68.1662	beta-2 adrenergic receptor-like [Limulus polyphemus]
uce-761		XP_022235169.1	67.0106	5-hydroxytryptamine receptor 1-like [Limulus polyphemus]
uce-761		XP_021003801.1	67.0106	5-hydroxytryptamine receptor 2A-like [Parasteatoda tepidariorum]
uce-761		KFM81921.1	66.6254	putative tyramine receptor 2, partial [Stegodyphus mimosarum]
uce-761		XP_022255119.1	65.855	5-hydroxytryptamine receptor 1-like [Limulus polyphemus]
uce-761		XP_013793516.1	65.855	alpha-2A adrenergic receptor-like [Limulus polyphemus]
uce-761		XP_002400445.1	65.855	G-protein coupled receptor, putative [Ixodes scapularis]
uce-761		KFM63867.1	65.855	Dopamine receptor 1, partial [Stegodyphus mimosarum]
uce-761		KFM59046.1	65.855	putative tyramine receptor 2, partial [Stegodyphus mimosarum]
uce-761		XP_015905615.1	65.0846	beta-2 adrenergic receptor [Parasteatoda tepidariorum]
uce-761		XP_022258761.1	64.6994	dopamine receptor 1-like [Limulus polyphemus]
uce-761		XP_013790897.2	64.6994	dopamine receptor 1-like [Limulus polyphemus]
uce-761		XP_015927542.1	64.6994	dopamine receptor 1 [Parasteatoda tepidariorum]
uce-761		XP_002409287.1	64.3142	dopamine D1/beta receptor, putative [Ixodes scapularis]
uce-761		XP_022243499.1	63.929	alpha-2C adrenergic receptor-like [Limulus polyphemus]
uce-761		XP_022243498.1	63.929	alpha-2C adrenergic receptor-like [Limulus polyphemus]
uce-761		XP_022243497.1	63.929	alpha-2C adrenergic receptor-like [Limulus polyphemus]
uce-763	ctl	KFM77993.1	70.4774	40S ribosomal protein S5, partial [Stegodyphus mimosarum]
uce-763		XP_013779576.1	80.8777	40S ribosomal protein S5 [Limulus polyphemus]
uce-763		XP_015913713.1	82.0333	40S ribosomal protein S5 [Parasteatoda tepidariorum]
uce-772	ctl	XP_015917471.1	107.457	E3 ubiquitin-protein ligase UBR3 isoform X1 [Parasteatoda tepidariorum]
uce-772		KFM58298.1	113.62	E3 ubiquitin-protein ligase UBR3, partial [Stegodyphus mimosarum]
uce-772		XP_022251421.1	115.931	E3 ubiquitin-protein ligase UBR3-like, partial [Limulus polyphemus]
uce-774	ctl	KFM69666.1	83.5741	T-complex protein 1 subunit zeta, partial [Stegodyphus mimosarum]
uce-774		XP_015909199.1	83.1889	T-complex protein 1 subunit zeta [Parasteatoda tepidariorum]
uce-774		XP_022253029.1	78.9518	T-complex protein 1 subunit zeta-like [Limulus polyphemus]
uce-774		XP_002404469.1	77.7962	chaperonin complex component, TCP-1 delta subunit, putative [Ixodes scapularis]
uce-778	ctl	XP_013792386.1	94.7449	anaphase-promoting complex subunit 11-like isoform X1 [Limulus polyphemus]
uce-778		KFM73788.1	95.1301	Anaphase-promoting complex subunit 11, partial [Stegodyphus mimosarum]
uce-791		KFM60577.1	111.694	Acetyl-CoA carboxylase, partial [Stegodyphus mimosarum]
uce-791		XP_022238316.1	104.375	acetyl-CoA carboxylase-like [Limulus polyphemus]
uce-791		XP_022251458.1	100.138	acetyl-CoA carboxylase isoform X3 [Limulus polyphemus]
uce-791		XP_015920095.1	97.0561	acetyl-CoA carboxylase isoform X8 [Parasteatoda tepidariorum]
uce-791		XP_002412555.1	93.5893	acetyl-CoA carboxylase, putative, partial [Ixodes scapularis]
uce-792	ctl	XP_022238316.1	172.555	acetyl-CoA carboxylase-like [Limulus polyphemus]
uce-792		XP_013783366.1	172.94	acetyl-CoA carboxylase isoform X1 [Limulus polyphemus]
uce-792		KFM64514.1	180.644	Acetyl-CoA carboxylase 1, partial [Stegodyphus mimosarum]
uce-792		XP_015920086.1	181.8	acetyl-CoA carboxylase isoform X1 [Parasteatoda tepidariorum]
uce-793	ctl	XP_013782651.1	102.064	RNA-binding protein Nova-1-like isoform X3 [Limulus polyphemus]
uce-793		XP_022250668.1	100.523	RNA-binding protein Nova-1-like isoform X2 [Limulus polyphemus]
uce-793		XP_022251646.1	99.7525	RNA-binding protein Nova-2-like isoform X3 [Limulus polyphemus]
uce-793		KFM79567.1	99.7525	RNA-binding protein Nova-1, partial [Stegodyphus mimosarum]
uce-793		XP_015920229.1	98.9821	RNA-binding protein Nova-1 isoform X2 [Parasteatoda tepidariorum]
uce-793		XP_013783582.1	98.5969	RNA-binding protein Nova-2-like isoform X1 [Limulus polyphemus]
uce-793		XP_002436065.1	95.5153	RNA-binding protein Nova-1, putative, partial [Ixodes scapularis]
uce-793		XP_022239992.1	95.1301	RNA-binding protein Nova-1-like [Limulus polyphemus]
uce-793		XP_022251783.1	93.9745	RNA-binding protein Nova-1-like isoform X2 [Limulus polyphemus]
uce-793		XP_022251782.1	93.9745	RNA-binding protein Nova-1-like isoform X1 [Limulus polyphemus]
uce-793		XP_022238664.1	93.2041	RNA-binding protein Nova-1-like [Limulus polyphemus]
uce-793		XP_015917970.1	91.6633	RNA-binding protein Nova-1-like [Parasteatoda tepidariorum]
uce-794	ctl	KFM77951.1	55.8398	Guanine nucleotide-binding protein subunit beta-5, partial [Stegodyphus mimosarum]
uce-794		XP_015906972.1	56.225	guanine nucleotide-binding protein subunit beta-5 [Parasteatoda tepidariorum]
uce-794		XP_013775848.1	94.7449	guanine nucleotide-binding protein G(I)/G(S)/G(T) subunit beta-1-like [Limulus polyphemus]
uce-794		XP_013783560.1	95.5153	guanine nucleotide-binding protein G(I)/G(S)/G(T) subunit beta-1-like, partial [Limulus polyphemus]
uce-794		XP_022254148.1	96.6709	guanine nucleotide-binding protein G(I)/G(S)/G(T) subunit beta-1 [Limulus polyphemus]
uce-794		XP_013774148.1	97.8265	guanine nucleotide-binding protein G(I)/G(S)/G(T) subunit beta-1-like [Limulus polyphemus]
uce-794		KFM80559.1	98.5969	Guanine nucleotide-binding protein G(I)/G(S)/G(T) subunit beta-1, partial [Stegodyphus mimosarum]
uce-794		XP_021001432.1	98.5969	guanine nucleotide-binding protein G(I)/G(S)/G(T) subunit beta-1 [Parasteatoda tepidariorum]
uce-839	paralogs	KFM74141.1	143.28	Plasma membrane calcium-transporting ATPase 3, partial [Stegodyphus mimosarum]
uce-839		XP_022242529.1	140.584	plasma membrane calcium-transporting ATPase 2-like [Limulus polyphemus]
uce-839		XP_022258939.1	135.191	plasma membrane calcium-transporting ATPase 1-like, partial [Limulus polyphemus]
uce-839		XP_015903637.1	134.42	plasma membrane calcium-transporting ATPase 1 isoform X7 [Parasteatoda tepidariorum]
uce-839		XP_002405704.1	133.265	plasma membrane ca-ATPase B2, putative [Ixodes scapularis]
uce-839		XP_022240050.1	132.88	plasma membrane calcium-transporting ATPase 2-like [Limulus polyphemus]
uce-839		XP_015905743.1	129.798	plasma membrane calcium-transporting ATPase 2 isoform X4 [Parasteatoda tepidariorum]
uce-840		XP_013793614.1	139.428	nipped-B-like protein A [Limulus polyphemus]
uce-840		XP_015917396.1	144.436	nipped-B-like protein [Parasteatoda tepidariorum]
uce-840		KFM78619.1	151.754	Nipped-B-like protein, partial [Stegodyphus mimosarum]
uce-854	ctl	XP_022243266.1	140.198	WD repeat-containing protein 7-like isoform X1 [Limulus polyphemus]
uce-854		XP_015924419.1	142.124	WD repeat-containing protein 7 [Parasteatoda tepidariorum]
uce-856	ctl	XP_015913707.1	130.954	pyruvate carboxylase, mitochondrial [Parasteatoda tepidariorum]
uce-856		XP_013779859.1	129.413	pyruvate carboxylase, mitochondrial-like [Limulus polyphemus]
uce-856		KFM65987.1	137.887	Pyruvate carboxylase, mitochondrial, partial [Stegodyphus mimosarum]
uce-857		XP_013779859.1	119.013	pyruvate carboxylase, mitochondrial-like [Limulus polyphemus]
uce-857		XP_015913707.1	119.013	pyruvate carboxylase, mitochondrial [Parasteatoda tepidariorum]
uce-857		KFM65987.1	123.635	Pyruvate carboxylase, mitochondrial, partial [Stegodyphus mimosarum]
uce-875	ctl	XP_013778611.1	90.1225	E3 ubiquitin-protein ligase TRIP12-like isoform X1 [Limulus polyphemus]
uce-875		KFM64798.1	100.908	putative E3 ubiquitin-protein ligase TRIP12, partial [Stegodyphus mimosarum]
uce-887	ctl	XP_015913965.1	125.176	nuclear export mediator factor NEMF-like [Parasteatoda tepidariorum]
uce-887		KFM68260.1	132.109	Nuclear export mediator factor Nemf, partial [Stegodyphus mimosarum]
uce-887		XP_013772570.1	135.961	nuclear export mediator factor NEMF-like [Limulus polyphemus]
uce-890	ctl	XP_022256947.1	76.2554	glycogen debranching enzyme-like, partial [Limulus polyphemus]
uce-890		XP_015914685.1	81.6481	glycogen debranching enzyme [Parasteatoda tepidariorum]
uce-894		KFM78063.1	56.9954	Histone acetyltransferase KAT8, partial [Stegodyphus mimosarum]
uce-894		XP_015907388.1	62.3882	histone acetyltransferase KAT8 [Parasteatoda tepidariorum]
uce-894		XP_013772135.1	62.3882	histone acetyltransferase KAT8-like [Limulus polyphemus]
uce-894		XP_013779738.1	82.8037	histone acetyltransferase KAT5-like isoform X1 [Limulus polyphemus]
uce-894		KFM57827.1	85.1149	Histone acetyltransferase KAT5, partial [Stegodyphus mimosarum]
uce-894		XP_015908854.1	87.0409	histone acetyltransferase KAT5 [Parasteatoda tepidariorum]
uce-897		KFM78178.1	115.931	Tetratricopeptide repeat protein 8, partial [Stegodyphus mimosarum]
uce-897		XP_015913001.1	118.242	tetratricopeptide repeat protein 8-like [Parasteatoda tepidariorum]
uce-916	paralogs	XP_015931104.1	94.3597	inhibitor of growth protein 4-like [Parasteatoda tepidariorum]
uce-916		KFM60716.1	93.9745	Inhibitor of growth protein 4, partial [Stegodyphus mimosarum]
uce-916		XP_013790819.1	90.1225	inhibitor of growth protein 4-like [Limulus polyphemus]
uce-916		XP_002407397.1	87.4261	conserved hypothetical protein [Ixodes scapularis]
uce-926	ctl	XP_022244174.1	135.961	cGMP-inhibited 3',5'-cyclic phosphodiesterase A-like isoform X4 [Limulus polyphemus]
uce-926		XP_022238555.1	133.265	cGMP-inhibited 3',5'-cyclic phosphodiesterase A-like [Limulus polyphemus]
uce-926		XP_022240383.1	132.88	cGMP-inhibited 3',5'-cyclic phosphodiesterase A-like [Limulus polyphemus]
uce-926		XP_002434488.1	123.25	cGMP-inhibited 3,5-cyclic phosphodiesterase, putative [Ixodes scapularis]
uce-926		KFM78831.1	122.865	cGMP-inhibited 3',5'-cyclic phosphodiesterase A, partial [Stegodyphus mimosarum]
uce-926		XP_015904147.1	122.479	cGMP-inhibited 3',5'-cyclic phosphodiesterase A-like isoform X2 [Parasteatoda tepidariorum]
uce-926		XP_015930887.2	112.849	cGMP-inhibited 3',5'-cyclic phosphodiesterase A-like [Parasteatoda tepidariorum]
uce-926		XP_002412738.1	69.707	3'5' cyclic nucleotide phosphodiesterase, putative, partial [Ixodes scapularis]
uce-926		KFM79429.1	65.855	Calcium/calmodulin-dependent 3',5'-cyclic nucleotide phosphodiesterase 1C, partial [Stegodyphus mimosarum]
uce-926		XP_013776992.1	63.929	calcium/calmodulin-dependent 3',5'-cyclic nucleotide phosphodiesterase 1-like isoform X1 [Limulus polyphemus]
uce-939	ctl	KFM71369.1	87.4261	Enhancer of polycomb-like protein, partial [Stegodyphus mimosarum]
uce-939		XP_022241033.1	92.0485	enhancer of polycomb homolog 1-like isoform X1 [Limulus polyphemus]
uce-939		XP_021000242.1	92.4337	enhancer of polycomb homolog 1-like [Parasteatoda tepidariorum]
uce-939		XP_013776085.1	93.9745	enhancer of polycomb homolog 1-like isoform X1 [Limulus polyphemus]
uce-945	same @ 3834	XP_022241553.1	125.561	eukaryotic peptide chain release factor subunit 1 isoform X2 [Limulus polyphemus]
uce-945		KFM68186.1	125.561	Eukaryotic peptide chain release factor subunit 1, partial [Stegodyphus mimosarum]
uce-945		XP_015903448.1	125.561	eukaryotic peptide chain release factor subunit 1 [Parasteatoda tepidariorum]
uce-945		XP_013791677.1	124.02	eukaryotic peptide chain release factor subunit 1 [Limulus polyphemus]
uce-945		XP_002400993.1	121.709	eukaryotic peptide chain release factor subunit, putative [Ixodes scapularis]
uce-953	ctl	XP_015927001.1	75.485	glucose-6-phosphatase 2 isoform X1 [Parasteatoda tepidariorum]
uce-953		XP_013781778.1	78.5666	glucose-6-phosphatase 2-like isoform X1 [Limulus polyphemus]
uce-953		XP_015914975.1	79.7221	glucose-6-phosphatase-like [Parasteatoda tepidariorum]
uce-953		KFM63746.1	91.2781	Glucose-6-phosphatase, partial [Stegodyphus mimosarum]
uce-953		XP_022254985.1	94.3597	glucose-6-phosphatase-like [Limulus polyphemus]
uce-953		XP_022245203.1	95.9005	glucose-6-phosphatase-like isoform X1 [Limulus polyphemus]
uce-953		XP_013786929.2	96.6709	glucose-6-phosphatase-like [Limulus polyphemus]
uce-971	ctl	XP_015920065.1	120.939	alpha-mannosidase 2C1 [Parasteatoda tepidariorum]
uce-971		KFM70079.1	118.242	Alpha-mannosidase 2C1, partial [Stegodyphus mimosarum]
uce-971		XP_022251811.1	94.7449	alpha-mannosidase 2C1-like [Limulus polyphemus]
uce-980	ctl	XP_013781086.2	109.383	uncharacterized protein LOC106465405 [Limulus polyphemus]
uce-980		XP_013780386.1	111.309	cytohesin-interacting protein-like isoform X1 [Limulus polyphemus]
uce-980		XP_015921954.1	111.309	general receptor for phosphoinositides 1-associated scaffold protein-like isoform X1 [Parasteatoda tepidariorum]
uce-986	ctl	XP_015921599.1	76.6406	tRNA-dihydrouridine(47) synthase [NAD(P)(+)]-like [Parasteatoda tepidariorum]
uce-986		KFM61995.1	80.8777	tRNA-dihydrouridine(47) synthase [NAD(P)(+)]-like protein, partial [Stegodyphus mimosarum]
uce-1012	ctl	KFM67417.1	64.6994	Cell division cycle protein 20-like protein, partial [Stegodyphus mimosarum]
uce-1012		XP_021001548.1	73.1738	cell division cycle protein 20 homolog [Parasteatoda tepidariorum]
uce-1012		XP_013783667.1	78.1814	cell division cycle protein 20 homolog [Limulus polyphemus]
uce-1012		XP_013781669.1	130.183	fizzy-related protein homolog [Limulus polyphemus]
uce-1012		XP_022258859.1	137.887	fizzy-related protein homolog, partial [Limulus polyphemus]
uce-1012		XP_015917764.1	150.984	fizzy-related protein homolog [Parasteatoda tepidariorum]
uce-1012		KFM76169.1	151.369	Fizzy-related protein-like protein, partial [Stegodyphus mimosarum]
uce-1018	ctl	KFM71239.1	63.1586	Zinc finger protein 583, partial [Stegodyphus mimosarum]
uce-1018		KFM80013.1	65.0846	Protein glass, partial [Stegodyphus mimosarum]
uce-1018		KFM66700.1	65.4698	Zinc finger protein 84, partial [Stegodyphus mimosarum]
uce-1018		KFM72204.1	65.4698	Zinc finger protein 782, partial [Stegodyphus mimosarum]
uce-1018		XP_021003011.1	65.4698	zinc finger protein 271-like, partial [Parasteatoda tepidariorum]
uce-1018		KFM65569.1	65.855	Zinc finger protein 84, partial [Stegodyphus mimosarum]
uce-1018		KFM68030.1	66.2402	Zinc finger protein 595, partial [Stegodyphus mimosarum]
uce-1018		KFM65119.1	66.6254	Zinc finger protein 221, partial [Stegodyphus mimosarum]
uce-1018		XP_015926352.1	66.6254	protein krueppel [Parasteatoda tepidariorum]
uce-1018		KFM65125.1	66.6254	Zinc finger protein 782, partial [Stegodyphus mimosarum]
uce-1018		KFM65080.1	66.6254	Zinc finger protein 430, partial [Stegodyphus mimosarum]
uce-1018		XP_015912921.1	67.0106	gastrula zinc finger protein XlCGF71.1 [Parasteatoda tepidariorum]
uce-1018		KFM62178.1	67.0106	Histone-lysine N-methyltransferase PRDM9, partial [Stegodyphus mimosarum]
uce-1018		KFM63380.1	67.0106	Zinc finger protein 732, partial [Stegodyphus mimosarum]
uce-1018		KFM83336.1	67.3958	Zinc finger protein 782, partial [Stegodyphus mimosarum]
uce-1018		KFM71727.1	67.3958	Zinc finger protein 271, partial [Stegodyphus mimosarum]
uce-1018		KFM83390.1	67.3958	Zinc finger protein 271, partial [Stegodyphus mimosarum]
uce-1018		KFM75097.1	67.781	Zinc finger protein 311, partial [Stegodyphus mimosarum]
uce-1018		KFM76331.1	67.781	Zinc finger protein 585A, partial [Stegodyphus mimosarum]
uce-1018		KFM69229.1	67.781	Zinc finger protein 681, partial [Stegodyphus mimosarum]
uce-1018		KFM83166.1	67.781	Zinc finger protein 84, partial [Stegodyphus mimosarum]
uce-1018		KFM63380.1	67.781	Zinc finger protein 732, partial [Stegodyphus mimosarum]
uce-1018		KFM74304.1	67.781	Zinc finger protein 98, partial [Stegodyphus mimosarum]
uce-1018		KFM57759.1	67.781	Zinc finger protein 570, partial [Stegodyphus mimosarum]
uce-1018		KFM72628.1	67.781	Zinc finger protein 235, partial [Stegodyphus mimosarum]
uce-1018		KFM68000.1	67.781	Zinc finger protein 84, partial [Stegodyphus mimosarum]
uce-1018		KFM83257.1	68.1662	Zinc finger protein 732, partial [Stegodyphus mimosarum]
uce-1018		KFM83257.1	68.1662	Zinc finger protein 732, partial [Stegodyphus mimosarum]
uce-1018		KFM83161.1	68.1662	Zinc finger protein 836, partial [Stegodyphus mimosarum]
uce-1018		KFM62178.1	68.1662	Histone-lysine N-methyltransferase PRDM9, partial [Stegodyphus mimosarum]
uce-1018		KFM76331.1	68.1662	Zinc finger protein 585A, partial [Stegodyphus mimosarum]
uce-1018		KFM83263.1	68.1662	Zinc finger protein 235, partial [Stegodyphus mimosarum]
uce-1018		KFM72628.1	68.1662	Zinc finger protein 235, partial [Stegodyphus mimosarum]
uce-1018		XP_021003547.1	68.1662	zinc finger protein 271-like isoform X1 [Parasteatoda tepidariorum]
uce-1018		KFM59715.1	68.5514	Zinc finger protein 91, partial [Stegodyphus mimosarum]
uce-1018		XP_021004358.1	68.5514	zinc finger protein 850-like isoform X1 [Parasteatoda tepidariorum]
uce-1018		KFM59713.1	68.9366	Zinc finger protein 98, partial [Stegodyphus mimosarum]
uce-1018		KFM65607.1	68.9366	Zinc finger protein 84, partial [Stegodyphus mimosarum]
uce-1018		KFM83407.1	68.9366	Zinc finger protein 726, partial [Stegodyphus mimosarum]
uce-1018		XP_022251166.1	68.9366	zinc finger protein 271-like, partial [Limulus polyphemus]
uce-1018		KFM69226.1	68.9366	Zinc finger protein 91, partial [Stegodyphus mimosarum]
uce-1018		KFM76924.1	68.9366	Zinc finger protein 271, partial [Stegodyphus mimosarum]
uce-1018		KFM74277.1	69.3218	Zinc finger protein 99, partial [Stegodyphus mimosarum]
uce-1018		KFM66829.1	69.3218	Zinc finger protein 26, partial [Stegodyphus mimosarum]
uce-1018		XP_015927579.1	69.707	zinc finger protein 271-like [Parasteatoda tepidariorum]
uce-1018		KFM74928.1	69.707	Zinc finger protein 160, partial [Stegodyphus mimosarum]
uce-1018		KFM73609.1	70.0922	Zinc finger protein 27, partial [Stegodyphus mimosarum]
uce-1018		KFM71430.1	70.0922	Zinc finger protein 271, partial [Stegodyphus mimosarum]
uce-1018		KFM72972.1	70.4774	Zinc finger protein 583, partial [Stegodyphus mimosarum]
uce-1018		KFM62356.1	70.4774	Zinc finger protein 729, partial [Stegodyphus mimosarum]
uce-1018		KFM83351.1	70.4774	Zinc finger protein 26, partial [Stegodyphus mimosarum]
uce-1018		KFM63382.1	70.4774	Zinc finger protein 585B, partial [Stegodyphus mimosarum]
uce-1018		KFM83351.1	70.4774	Zinc finger protein 26, partial [Stegodyphus mimosarum]
uce-1018		XP_015922850.1	70.8626	zinc finger protein 271 [Parasteatoda tepidariorum]
uce-1018		KFM72193.1	71.2478	Zinc finger protein 271, partial [Stegodyphus mimosarum]
uce-1018		KFM68424.1	71.2478	Zinc finger protein 112-like protein, partial [Stegodyphus mimosarum]
uce-1018		KFM83390.1	71.2478	Zinc finger protein 271, partial [Stegodyphus mimosarum]
uce-1018		KFM74128.1	71.633	Zinc finger protein 84, partial [Stegodyphus mimosarum]
uce-1018		KFM68029.1	71.633	Zinc finger protein 658, partial [Stegodyphus mimosarum]
uce-1018		KFM73610.1	71.633	Zinc finger protein 271, partial [Stegodyphus mimosarum]
uce-1018		KFM78423.1	73.1738	Zinc finger protein 271, partial [Stegodyphus mimosarum]
uce-1018		KFM56972.1	73.1738	Zinc finger protein 347, partial [Stegodyphus mimosarum]
uce-1018		XP_015922835.1	73.559	zinc finger protein OZF-like [Parasteatoda tepidariorum]
uce-1018		KFM68036.1	77.7962	Zinc finger protein 726, partial [Stegodyphus mimosarum]
uce-1018		XP_013777398.1	101.293	zinc finger protein 2 homolog [Limulus polyphemus]
uce-1018		XP_013790515.1	110.923	zinc finger protein 391-like [Limulus polyphemus]
uce-1018		XP_022251505.1	114.39	zinc finger protein 2-like [Limulus polyphemus]
uce-1018		XP_022256409.1	117.472	zinc finger protein 558-like [Limulus polyphemus]
uce-1018		XP_022251675.1	117.857	zinc finger and SCAN domain-containing protein 21-like [Limulus polyphemus]
uce-1018		XP_022258526.1	118.242	zinc finger protein 2 homolog [Limulus polyphemus]
uce-1018		XP_022245201.1	120.168	zinc finger protein 287-like [Limulus polyphemus]
uce-1018		KFM65160.1	122.479	Zinc finger protein 227, partial [Stegodyphus mimosarum]
uce-1018		XP_021002081.1	125.946	zinc finger protein 672 [Parasteatoda tepidariorum]
uce-1019	paralogs	KFM73124.1	198.749	Serine/threonine-protein kinase minibrain, partial [Stegodyphus mimosarum]
uce-1019		XP_015903390.1	194.897	dual specificity tyrosine-phosphorylation-regulated kinase 1B isoform X3 [Parasteatoda tepidariorum]
uce-1019		XP_015903389.1	194.897	dual specificity tyrosine-phosphorylation-regulated kinase 1B isoform X2 [Parasteatoda tepidariorum]
uce-1019		XP_015903388.1	194.897	dual specificity tyrosine-phosphorylation-regulated kinase 1B isoform X1 [Parasteatoda tepidariorum]
uce-1019		XP_002413581.1	191.815	cyclin T-dependent kinase CDK9, putative, partial [Ixodes scapularis]
uce-1019		XP_015917191.1	187.963	dual specificity tyrosine-phosphorylation-regulated kinase 1A-like [Parasteatoda tepidariorum]
uce-1019		KFM66757.1	187.193	Serine/threonine-protein kinase minibrain, partial [Stegodyphus mimosarum]
uce-1019		XP_022256640.1	182.57	dual specificity tyrosine-phosphorylation-regulated kinase 1B-like [Limulus polyphemus]
uce-1019		XP_022245018.1	182.185	serine/threonine-protein kinase minibrain-like isoform X4 [Limulus polyphemus]
uce-1019		XP_022236949.1	182.185	dual specificity tyrosine-phosphorylation-regulated kinase 1A-like [Limulus polyphemus]
uce-1019		XP_022235642.1	177.948	dual specificity tyrosine-phosphorylation-regulated kinase 1B-like [Limulus polyphemus]
uce-1019		XP_013787704.2	177.948	serine/threonine-protein kinase minibrain-like [Limulus polyphemus]
uce-1019		XP_022239492.1	105.145	dual specificity tyrosine-phosphorylation-regulated kinase 2-like [Limulus polyphemus]
uce-1019		XP_013772656.1	105.145	dual specificity tyrosine-phosphorylation-regulated kinase 2-like [Limulus polyphemus]
uce-1019		KFM56935.1	104.375	Dual specificity tyrosine-phosphorylation-regulated kinase 2, partial [Stegodyphus mimosarum]
uce-1019		XP_015931169.1	104.375	dual specificity tyrosine-phosphorylation-regulated kinase 2-like [Parasteatoda tepidariorum]
uce-1019		XP_015928681.1	103.99	dual specificity tyrosine-phosphorylation-regulated kinase 2-like [Parasteatoda tepidariorum]
uce-1019		XP_013790925.1	102.834	dual specificity tyrosine-phosphorylation-regulated kinase 2-like [Limulus polyphemus]
uce-1019		XP_002401439.1	102.834	mitogen-activated protein kinase, putative, partial [Ixodes scapularis]
uce-1019		XP_021000107.1	102.449	dual specificity tyrosine-phosphorylation-regulated kinase 4-like [Parasteatoda tepidariorum]
uce-1019		XP_022253547.1	102.064	dual specificity tyrosine-phosphorylation-regulated kinase 4-like isoform X3 [Limulus polyphemus]
uce-1019		XP_022253546.1	102.064	dual specificity tyrosine-phosphorylation-regulated kinase 4-like isoform X2 [Limulus polyphemus]
uce-1019		XP_022253545.1	102.064	dual specificity tyrosine-phosphorylation-regulated kinase 4-like isoform X1 [Limulus polyphemus]
uce-1019		KFM68593.1	102.064	Dual specificity tyrosine-phosphorylation-regulated kinase 2, partial [Stegodyphus mimosarum]
uce-1019		XP_013777857.1	101.293	dual specificity tyrosine-phosphorylation-regulated kinase 2-like [Limulus polyphemus]
uce-1019		XP_013793123.1	100.523	dual specificity tyrosine-phosphorylation-regulated kinase 4-like [Limulus polyphemus]
uce-1019		XP_022243053.1	100.138	dual specificity tyrosine-phosphorylation-regulated kinase 2-like [Limulus polyphemus]
uce-1019		XP_022251332.1	97.8265	dual specificity tyrosine-phosphorylation-regulated kinase 2-like [Limulus polyphemus]
uce-1019		XP_021003184.1	91.2781	dual specificity tyrosine-phosphorylation-regulated kinase 4-like [Parasteatoda tepidariorum]
uce-1019		KFM77468.1	85.5001	Homeodomain-interacting protein kinase 2, partial [Stegodyphus mimosarum]
uce-1019		XP_022245806.1	82.8037	homeodomain-interacting protein kinase 2-like [Limulus polyphemus]
uce-1019		XP_013787996.1	82.8037	homeodomain-interacting protein kinase 2-like, partial [Limulus polyphemus]
uce-1019		XP_015929843.1	82.8037	homeodomain-interacting protein kinase 2 [Parasteatoda tepidariorum]
uce-1019		XP_015913642.1	81.2629	homeodomain-interacting protein kinase 2 isoform X2 [Parasteatoda tepidariorum]
uce-1019		XP_015913641.1	81.2629	homeodomain-interacting protein kinase 2 isoform X1 [Parasteatoda tepidariorum]
uce-1019		XP_002405512.1	80.4925	hipk, putative [Ixodes scapularis]
uce-1019		XP_002404601.1	80.4925	dual specificity phosphorylation-regulated tyrosine kinase, putative, partial [Ixodes scapularis]
uce-1019		KFM81362.1	67.0106	Serine/threonine-protein kinase PRP4-like protein, partial [Stegodyphus mimosarum]
uce-1019		XP_002399646.1	66.2402	cyclin T-dependent kinase CDK9, putative [Ixodes scapularis]
uce-1019		XP_015909521.2	66.2402	dual specificity protein kinase CLK2-like isoform X4 [Parasteatoda tepidariorum]
uce-1019		XP_022242138.1	65.4698	serine/threonine-protein kinase PRP4 homolog [Limulus polyphemus]
uce-1019		XP_013774997.1	65.4698	serine/threonine-protein kinase PRP4 homolog [Limulus polyphemus]
uce-1019		XP_015909520.2	65.4698	dual specificity protein kinase CLK2-like isoform X3 [Parasteatoda tepidariorum]
uce-1019		XP_015910892.1	65.0846	serine/threonine-protein kinase PRP4 homolog [Parasteatoda tepidariorum]
uce-1019		XP_013775053.1	63.929	dual specificity protein kinase CLK2-like isoform X1 [Limulus polyphemus]
uce-1048	ctl	KFM82910.1	28.1054	Elongation factor G, mitochondrial, partial [Stegodyphus mimosarum]
uce-1048		XP_021004649.1	28.1054	elongation factor G, mitochondrial-like [Parasteatoda tepidariorum]
uce-1048		XP_022243188.1	24.2534	LOW QUALITY PROTEIN: elongation factor G, mitochondrial-like [Limulus polyphemus]
uce-1048		XP_002436019.1	21.1718	translation elongation factor G, putative, partial [Ixodes scapularis]
uce-1055	ctl	XP_015910558.1	80.4925	importin subunit beta-1-like [Parasteatoda tepidariorum]
uce-1055		KFM60240.1	92.4337	Importin subunit beta-1, partial [Stegodyphus mimosarum]
uce-1055		XP_013779228.1	96.2857	importin subunit beta-1-like isoform X1 [Limulus polyphemus]
uce-1061	ctl	XP_013786826.1	111.694	signal recognition particle receptor subunit alpha-like isoform X1 [Limulus polyphemus]
uce-1061		XP_013772842.1	115.546	signal recognition particle receptor subunit alpha homolog [Limulus polyphemus]
uce-1061		KFM82908.1	124.405	Signal recognition particle receptor subunit alpha, partial [Stegodyphus mimosarum]
uce-1061		XP_015914861.1	125.946	signal recognition particle receptor subunit alpha isoform X1 [Parasteatoda tepidariorum]
uce-1091	ctl	XP_002433761.1	100.523	lysyl-tRNA synthetase, putative [Ixodes scapularis]
uce-1091		XP_013785142.1	102.449	lysine--tRNA ligase-like isoform X1 [Limulus polyphemus]
uce-1091		KFM80493.1	104.76	Lysine--tRNA ligase, partial [Stegodyphus mimosarum]
uce-1091		XP_015917437.1	105.916	lysine--tRNA ligase [Parasteatoda tepidariorum]
uce-1099	paralogs	XP_015909486.1	78.9518	merlin-like [Parasteatoda tepidariorum]
uce-1099		XP_022258530.1	80.4925	merlin-like [Limulus polyphemus]
uce-1099		KFM73866.1	81.2629	Merlin, partial [Stegodyphus mimosarum]
uce-1099		XP_013794693.1	102.834	moesin/ezrin/radixin homolog 1-like [Limulus polyphemus]
uce-1099		XP_022253344.1	103.219	moesin/ezrin/radixin homolog 1-like isoform X1 [Limulus polyphemus]
uce-1099		XP_013781090.1	103.605	moesin/ezrin/radixin homolog 1-like [Limulus polyphemus]
uce-1099		KFM62699.1	104.76	Radixin, partial [Stegodyphus mimosarum]
uce-1099		XP_015929578.1	106.686	moesin/ezrin/radixin homolog 1 [Parasteatoda tepidariorum]
uce-1100	ctl	XP_022238019.1	100.523	moesin/ezrin/radixin homolog 1-like [Limulus polyphemus]
uce-1100		XP_013781090.1	103.219	moesin/ezrin/radixin homolog 1-like [Limulus polyphemus]
uce-1100		XP_022253345.1	103.605	moesin/ezrin/radixin homolog 1-like isoform X1 [Limulus polyphemus]
uce-1100		XP_015929578.1	108.997	moesin/ezrin/radixin homolog 1 [Parasteatoda tepidariorum]
uce-1100		KFM62700.1	110.153	Moesin/ezrin/radixin-like protein, partial [Stegodyphus mimosarum]
uce-1108	ctl	KFM58032.1	97.8265	WD repeat-containing protein 20, partial [Stegodyphus mimosarum]
uce-1108		XP_013771772.2	246.514	LOW QUALITY PROTEIN: WD repeat-containing protein 20-like [Limulus polyphemus]
uce-1108		XP_015915059.1	260.381	WD repeat-containing protein 20 [Parasteatoda tepidariorum]
uce-1121	ctl	XP_021002778.1	58.5362	eukaryotic translation initiation factor 4 gamma 3 [Parasteatoda tepidariorum]
uce-1121		XP_013779883.1	58.5362	eukaryotic translation initiation factor 4 gamma 3-like [Limulus polyphemus]
uce-1121		XP_015920777.1	60.8474	eukaryotic translation initiation factor 4 gamma 3-like, partial [Parasteatoda tepidariorum]
uce-1121		KFM57183.1	63.1586	Eukaryotic translation initiation factor 4 gamma 3, partial [Stegodyphus mimosarum]
uce-1121		XP_021003838.1	64.3142	eukaryotic translation initiation factor 4 gamma 3 [Parasteatoda tepidariorum]
uce-1121		XP_022255636.1	161.384	eukaryotic translation initiation factor 4 gamma 2-like isoform X1 [Limulus polyphemus]
uce-1121		XP_015903142.1	174.481	eukaryotic translation initiation factor 4 gamma 2-like [Parasteatoda tepidariorum]
uce-1121		KFM57634.1	176.407	hypothetical protein X975_15012, partial [Stegodyphus mimosarum]
uce-1133	ctl	XP_013776393.1	81.2629	mitogen-activated protein kinase kinase kinase 7-like isoform X1 [Limulus polyphemus]
uce-1133		XP_015922325.1	83.5741	mitogen-activated protein kinase kinase kinase 7 [Parasteatoda tepidariorum]
uce-1133		KFM59726.1	87.0409	Mitogen-activated protein kinase kinase kinase 7, partial [Stegodyphus mimosarum]
uce-1137	ctl	XP_002410756.1	25.7942	26S proteasome non-ATPase regulatory subunit, putative [Ixodes scapularis]
uce-1137		XP_002410756.1	23.8682	26S proteasome non-ATPase regulatory subunit, putative [Ixodes scapularis]
uce-1137		KFM72629.1	25.7942	26S proteasome non-ATPase regulatory subunit 14, partial [Stegodyphus mimosarum]
uce-1137		XP_015910060.1	25.7942	26S proteasome non-ATPase regulatory subunit 14 [Parasteatoda tepidariorum]
uce-1137		KFM72629.1	23.8682	26S proteasome non-ATPase regulatory subunit 14, partial [Stegodyphus mimosarum]
uce-1137		XP_015910060.1	23.8682	26S proteasome non-ATPase regulatory subunit 14 [Parasteatoda tepidariorum]
uce-1137		XP_013789696.1	25.7942	26S proteasome non-ATPase regulatory subunit 14 [Limulus polyphemus]
uce-1137		XP_013789696.1	23.8682	26S proteasome non-ATPase regulatory subunit 14 [Limulus polyphemus]
uce-1150	ctl	XP_002415425.1	102.834	tubulin gamma chain, putative [Ixodes scapularis]
uce-1150		KFM79400.1	100.523	Tubulin gamma-1 chain, partial [Stegodyphus mimosarum]
uce-1150		XP_021001121.1	100.523	tubulin gamma-1 chain [Parasteatoda tepidariorum]
uce-1180	paralogs	XP_013783175.1	85.1149	RING finger and SPRY domain-containing protein 1-like [Limulus polyphemus]
uce-1180		KFM72317.1	82.8037	RING finger and SPRY domain-containing protein 1, partial [Stegodyphus mimosarum]
uce-1180		XP_015912571.1	81.6481	RING finger and SPRY domain-containing protein 1-like [Parasteatoda tepidariorum]
uce-1180		XP_015912570.1	81.6481	RING finger and SPRY domain-containing protein 1-like [Parasteatoda tepidariorum]
uce-1182	ctl	XP_002411702.1	140.969	DNA replication factor/protein phosphatase inhibitor SET/SPR-2, putative [Ixodes scapularis]
uce-1182		KFM71851.1	137.887	Protein SET, partial [Stegodyphus mimosarum]
uce-1182		XP_015923984.1	137.117	protein SET [Parasteatoda tepidariorum]
uce-1182		XP_013772044.1	135.191	protein SET-like isoform X1 [Limulus polyphemus]
uce-1182		XP_013786758.1	131.339	protein SET-like isoform X2 [Limulus polyphemus]
uce-1182		XP_013779842.1	130.183	protein SET-like [Limulus polyphemus]
uce-1182		XP_013780809.1	127.102	protein SET-like [Limulus polyphemus]
uce-1182		XP_013779974.1	124.405	protein SET-like [Limulus polyphemus]
uce-1195		XP_022242608.1	86.2705	inositol 1,4,5-trisphosphate receptor type 1-like [Limulus polyphemus]
uce-1195		XP_022242147.1	92.0485	inositol 1,4,5-trisphosphate receptor-like isoform X1 [Limulus polyphemus]
uce-1195		XP_015908140.1	92.0485	inositol 1,4,5-trisphosphate receptor [Parasteatoda tepidariorum]
uce-1195		KFM80938.1	94.3597	Inositol 1,4,5-trisphosphate receptor type 1, partial [Stegodyphus mimosarum]
uce-1197	ctl	KFM80939.1	100.908	Inositol 1,4,5-trisphosphate receptor, partial [Stegodyphus mimosarum]
uce-1197		XP_022242147.1	109.768	inositol 1,4,5-trisphosphate receptor-like isoform X1 [Limulus polyphemus]
uce-1197	same @ 4084	XP_022242608.1	109.768	inositol 1,4,5-trisphosphate receptor type 1-like [Limulus polyphemus]
uce-1197		XP_015908140.1	112.849	inositol 1,4,5-trisphosphate receptor [Parasteatoda tepidariorum]
uce-1198		XP_022242147.1	109.383	inositol 1,4,5-trisphosphate receptor-like isoform X1 [Limulus polyphemus]
uce-1198		XP_015908140.1	107.071	inositol 1,4,5-trisphosphate receptor [Parasteatoda tepidariorum]
uce-1198		XP_002415751.1	100.908	type 3 inositol 1,4,5-trisphosphate receptor, putative [Ixodes scapularis]
uce-1198		KFM80940.1	70.4774	Inositol 1,4,5-trisphosphate receptor, partial [Stegodyphus mimosarum]
uce-1203	ctl	XP_021002656.1	100.138	mediator of RNA polymerase II transcription subunit 12-like protein [Parasteatoda tepidariorum]
uce-1203		XP_022254050.1	101.679	mediator of RNA polymerase II transcription subunit 12-like protein [Limulus polyphemus]
uce-1203		KFM81956.1	112.079	Mediator of RNA polymerase II transcription subunit 12, partial [Stegodyphus mimosarum]
uce-1205	paralogs	XP_015911861.1	152.14	sodium/potassium-transporting ATPase subunit beta-like [Parasteatoda tepidariorum]
uce-1205		XP_013785750.1	139.043	sodium/potassium-transporting ATPase subunit beta-like [Limulus polyphemus]
uce-1205		XP_013773290.1	135.576	sodium/potassium-transporting ATPase subunit beta-like [Limulus polyphemus]
uce-1205		XP_013785037.1	129.028	sodium/potassium-transporting ATPase subunit beta-like [Limulus polyphemus]
uce-1205		XP_013772104.1	127.872	sodium/potassium-transporting ATPase subunit beta-like isoform X1 [Limulus polyphemus]
uce-1205		XP_002415756.1	119.013	sodium/potassium-dependent ATPase beta-2 subunit, putative [Ixodes scapularis]
uce-1205		XP_002410791.1	113.235	Na+/K+ ATPase, beta subunit, putative [Ixodes scapularis]
uce-1205		KFM76729.1	105.916	Sodium/potassium-transporting ATPase subunit beta-2, partial [Stegodyphus mimosarum]
uce-1205		XP_021002558.1	101.679	sodium/potassium-transporting ATPase subunit beta-2-like [Parasteatoda tepidariorum]
uce-1205		XP_022245619.1	73.1738	sodium/potassium-transporting ATPase subunit beta-2-like [Limulus polyphemus]
uce-1205		XP_022253917.1	71.2478	sodium/potassium-transporting ATPase subunit beta-like [Limulus polyphemus]
uce-1205		KFM64190.1	65.4698	Sodium/potassium-transporting ATPase subunit beta, partial [Stegodyphus mimosarum]
uce-1205		XP_015930297.1	65.4698	sodium/potassium-transporting ATPase subunit beta-1-like [Parasteatoda tepidariorum]
uce-1206	ctl	XP_013776574.1	55.8398	methylcrotonoyl-CoA carboxylase subunit alpha, mitochondrial-like [Limulus polyphemus]
uce-1206		XP_013778229.1	72.4034	propionyl-CoA carboxylase alpha chain, mitochondrial-like [Limulus polyphemus]
uce-1206		KFM62552.1	78.1814	Propionyl-CoA carboxylase alpha chain, mitochondrial, partial [Stegodyphus mimosarum]
uce-1206		XP_015923066.1	79.337	propionyl-CoA carboxylase alpha chain, mitochondrial [Parasteatoda tepidariorum]
uce-1220	ctl	KFM62912.1	125.176	NADH dehydrogenase [ubiquinone] iron-sulfur protein 8, mitochondrial, partial [Stegodyphus mimosarum]
uce-1220		XP_013786762.1	124.405	NADH-ubiquinone oxidoreductase subunit 8-like [Limulus polyphemus]
uce-1220		XP_015929145.1	122.094	NADH dehydrogenase [ubiquinone] iron-sulfur protein 8, mitochondrial-like [Parasteatoda tepidariorum]
uce-1220		XP_002400836.1	115.161	NADH:ubiquinone oxidoreductase, NDUFS8/23 kDa subunit, putative, partial [Ixodes scapularis]
uce-1228	ctl	XP_015907029.1	78.9518	cleavage and polyadenylation specificity factor subunit 2 [Parasteatoda tepidariorum]
uce-1228		XP_022244622.1	82.4185	cleavage and polyadenylation specificity factor subunit 2-like isoform X1 [Limulus polyphemus]
uce-1228		KFM58192.1	82.8037	Cleavage and polyadenylation specificity factor subunit 2, partial [Stegodyphus mimosarum]
uce-1238	ctl	XP_015920860.1	103.99	mannose-1-phosphate guanyltransferase beta [Parasteatoda tepidariorum]
uce-1238	same @ 3236	KFM70041.1	107.842	Mannose-1-phosphate guanyltransferase beta-A, partial [Stegodyphus mimosarum]
uce-1241	ctl	XP_002434050.1	88.5817	60S ribosomal protein L5, putative [Ixodes scapularis]
uce-1241		XP_015913982.1	88.5817	60S ribosomal protein L5-A [Parasteatoda tepidariorum]
uce-1241		XP_013774820.1	88.1965	60S ribosomal protein L5-A-like [Limulus polyphemus]
uce-1241		KFM66007.1	88.1965	60S ribosomal protein L5-A, partial [Stegodyphus mimosarum]
uce-1245		XP_013778179.1	59.6918	protein PRRC2C-like isoform X1 [Limulus polyphemus]
uce-1245		XP_015914916.1	67.781	protein PRRC2C isoform X1 [Parasteatoda tepidariorum]
uce-1246	ctl	XP_013778179.1	98.2117	protein PRRC2C-like isoform X1 [Limulus polyphemus]
uce-1246		XP_015914916.1	105.916	protein PRRC2C isoform X1 [Parasteatoda tepidariorum]
uce-1247		XP_015914918.1	128.257	protein PRRC2C isoform X3 [Parasteatoda tepidariorum]
uce-1247		XP_013778179.1	113.62	protein PRRC2C-like isoform X1 [Limulus polyphemus]
uce-1247		XP_002433513.1	104.76	bat2, putative, partial [Ixodes scapularis]
uce-1250		XP_015930022.1	105.145	splicing factor 3B subunit 4 [Parasteatoda tepidariorum]
uce-1250		XP_022254234.1	109.383	splicing factor 3B subunit 4-like [Limulus polyphemus]
uce-1250		KFM68815.1	113.235	Splicing factor 3B subunit 4, partial [Stegodyphus mimosarum]
uce-1251	ctl	XP_015911136.1	124.405	splicing factor 3B subunit 4-like [Parasteatoda tepidariorum]
uce-1251		XP_015930022.1	128.642	splicing factor 3B subunit 4 [Parasteatoda tepidariorum]
uce-1251		XP_022254234.1	128.642	splicing factor 3B subunit 4-like [Limulus polyphemus]
uce-1251		KFM68815.1	130.183	Splicing factor 3B subunit 4, partial [Stegodyphus mimosarum]
uce-1252		XP_015913086.2	60.077	transcriptional regulator ATRX homolog [Parasteatoda tepidariorum]
uce-1252		XP_013783692.2	63.929	calcium/calmodulin-dependent protein kinase kinase 2-like [Limulus polyphemus]
uce-1252		XP_021004196.1	81.6481	DNA repair and recombination protein RAD54B [Parasteatoda tepidariorum]
uce-1252		XP_013777941.1	97.8265	DNA repair and recombination protein RAD54B-like, partial [Limulus polyphemus]
uce-1252		XP_015917010.1	125.176	DNA repair and recombination protein RAD54-like [Parasteatoda tepidariorum]
uce-1252		XP_013783608.1	135.191	DNA repair and recombination protein RAD54-like [Limulus polyphemus]
uce-1252		KFM59190.1	137.887	DNA repair and recombination protein RAD54-like protein, partial [Stegodyphus mimosarum]
uce-1254	ctl	XP_015917010.1	338.961	DNA repair and recombination protein RAD54-like [Parasteatoda tepidariorum]
uce-1254		KFM59190.1	335.88	DNA repair and recombination protein RAD54-like protein, partial [Stegodyphus mimosarum]
uce-1254		XP_013783608.1	296.204	DNA repair and recombination protein RAD54-like [Limulus polyphemus]
uce-1254		XP_002410926.1	244.202	conserved hypothetical protein, partial [Ixodes scapularis]
uce-1254		XP_013777941.1	162.54	DNA repair and recombination protein RAD54B-like, partial [Limulus polyphemus]
uce-1254		XP_002405194.1	159.844	DNA repair and recombination protein RAD54B, putative, partial [Ixodes scapularis]
uce-1254		KFM58605.1	152.14	DNA repair and recombination protein RAD54B, partial [Stegodyphus mimosarum]
uce-1254		XP_021004196.1	146.362	DNA repair and recombination protein RAD54B [Parasteatoda tepidariorum]
uce-1254		XP_021000692.1	126.331	DNA excision repair protein ERCC-6 [Parasteatoda tepidariorum]
uce-1254		XP_002410509.1	125.946	conserved hypothetical protein [Ixodes scapularis]
uce-1254		KFM67945.1	125.561	DNA excision repair protein ERCC-6, partial [Stegodyphus mimosarum]
uce-1254		XP_015913086.2	124.405	transcriptional regulator ATRX homolog [Parasteatoda tepidariorum]
uce-1254		KFM57756.1	122.865	Transcriptional regulator ATRX, partial [Stegodyphus mimosarum]
uce-1254		KFM79283.1	115.931	Helicase ARIP4, partial [Stegodyphus mimosarum]
uce-1254		XP_015904971.2	115.931	uncharacterized protein LOC107437471 [Parasteatoda tepidariorum]
uce-1254		XP_022237826.1	115.546	helicase ARIP4-like isoform X3 [Limulus polyphemus]
uce-1254		XP_022237825.1	115.546	helicase ARIP4-like isoform X2 [Limulus polyphemus]
uce-1254		XP_013794504.2	115.546	helicase ARIP4-like isoform X1 [Limulus polyphemus]
uce-1254		XP_002435939.1	112.464	DNA excision repair protein ERCC-6, putative, partial [Ixodes scapularis]
uce-1254		XP_022245505.1	112.079	LOW QUALITY PROTEIN: helicase ARIP4-like [Limulus polyphemus]
uce-1254		XP_002412008.1	110.923	steroid receptor-interacting snf2 domain protein, putative [Ixodes scapularis]
uce-1254		XP_013789879.2	110.153	transcriptional regulator ATRX homolog, partial [Limulus polyphemus]
uce-1254		XP_015915720.2	106.301	DNA excision repair protein ERCC-6-like [Parasteatoda tepidariorum]
uce-1254		XP_015915718.2	106.301	DNA excision repair protein ERCC-6-like [Parasteatoda tepidariorum]
uce-1254		XP_015925521.1	103.605	DNA excision repair protein ERCC-6-like [Parasteatoda tepidariorum]
uce-1254		XP_022256927.1	103.219	DNA excision repair protein ERCC-6-like [Limulus polyphemus]
uce-1254		XP_013776904.1	102.449	LOW QUALITY PROTEIN: DNA excision repair protein ERCC-6-like [Limulus polyphemus]
uce-1254		XP_022255226.1	101.293	probable global transcription activator SNF2L2 [Limulus polyphemus]
uce-1254		XP_022255160.1	101.293	probable global transcription activator SNF2L2 isoform X5 [Limulus polyphemus]
uce-1254		XP_022255145.1	101.293	transcription activator BRG1-like isoform X1 [Limulus polyphemus]
uce-1254		KFM82780.1	100.523	Transcription activator BRG1, partial [Stegodyphus mimosarum]
uce-1254		XP_022239171.1	99.7525	chromodomain-helicase-DNA-binding protein 1-like [Limulus polyphemus]
uce-1254		XP_015906861.1	98.5969	probable global transcription activator SNF2L2 [Parasteatoda tepidariorum]
uce-1254		XP_022254678.1	98.2117	lymphoid-specific helicase-like [Limulus polyphemus]
uce-1254		XP_015913292.1	97.0561	lymphoid-specific helicase-like [Parasteatoda tepidariorum]
uce-1254		XP_015910444.1	97.0561	DNA helicase INO80 isoform X3 [Parasteatoda tepidariorum]
uce-1254		XP_002408725.1	96.6709	conserved hypothetical protein [Ixodes scapularis]
uce-1254		XP_002434698.1	96.2857	chromodomain helicase DNA binding protein, putative [Ixodes scapularis]
uce-1254		XP_022245679.1	95.5153	chromodomain-helicase-DNA-binding protein Mi-2 homolog isoform X2 [Limulus polyphemus]
uce-1254		KFM81435.1	95.5153	hypothetical protein X975_03670, partial [Stegodyphus mimosarum]
uce-1254		XP_015904649.1	95.1301	transcription termination factor 2-like [Parasteatoda tepidariorum]
uce-1254		XP_013780563.1	94.7449	TATA-binding protein-associated factor 172-like [Limulus polyphemus]
uce-1254		XP_021002240.1	94.7449	helicase domino isoform X1 [Parasteatoda tepidariorum]
uce-1254		KFM71097.1	94.3597	Helicase domino, partial [Stegodyphus mimosarum]
uce-1254		XP_015913009.1	94.3597	chromodomain-helicase-DNA-binding protein Mi-2 homolog isoform X5 [Parasteatoda tepidariorum]
uce-1254		XP_021001512.1	93.9745	chromatin-remodeling complex ATPase chain Iswi [Parasteatoda tepidariorum]
uce-1254		XP_021001398.1	93.9745	chromodomain-helicase-DNA-binding protein 1-like [Parasteatoda tepidariorum]
uce-1254		XP_021001512.1	93.9745	chromatin-remodeling complex ATPase chain Iswi [Parasteatoda tepidariorum]
uce-1254		XP_013776880.1	93.5893	SWI/SNF-related matrix-associated actin-dependent regulator of chromatin subfamily A containing DEAD/H box 1-like [Limulus polyphemus]
uce-1254		KFM56746.1	92.8189	hypothetical protein X975_21529, partial [Stegodyphus mimosarum]
uce-1254		XP_022250926.1	92.4337	helicase domino-like [Limulus polyphemus]
uce-1254		KFM58087.1	92.4337	TATA-binding protein-associated factor 172, partial [Stegodyphus mimosarum]
uce-1254		XP_002403274.1	92.0485	chromodomain helicase DNA binding protein, putative, partial [Ixodes scapularis]
uce-1254		XP_002414557.1	91.2781	helicase, putative, partial [Ixodes scapularis]
uce-1254		XP_015920850.1	91.2781	TATA-binding protein-associated factor 172-like [Parasteatoda tepidariorum]
uce-1254		XP_021002497.1	90.8929	chromodomain-helicase-DNA-binding protein 7 [Parasteatoda tepidariorum]
uce-1254		KFM59802.1	90.5077	hypothetical protein X975_06629, partial [Stegodyphus mimosarum]
uce-1254		XP_022250612.1	89.7373	LOW QUALITY PROTEIN: chromodomain-helicase-DNA-binding protein 8-like [Limulus polyphemus]
uce-1254		XP_002399349.1	89.7373	helicase, putative, partial [Ixodes scapularis]
uce-1254		XP_002407938.1	89.3521	helicase, putative [Ixodes scapularis]
uce-1254		XP_022256205.1	88.9669	transcription termination factor 2-like [Limulus polyphemus]
uce-1254		XP_002413614.1	88.1965	E1A-binding protein p400, putative, partial [Ixodes scapularis]
uce-1254		KFM81717.1	88.1965	Lymphocyte-specific helicase, partial [Stegodyphus mimosarum]
uce-1254		XP_022248337.1	86.6557	SWI/SNF-related matrix-associated actin-dependent regulator of chromatin subfamily A containing DEAD/H box 1-like [Limulus polyphemus]
uce-1254		XP_022248336.1	86.6557	SWI/SNF-related matrix-associated actin-dependent regulator of chromatin subfamily A containing DEAD/H box 1-like [Limulus polyphemus]
uce-1254		XP_013792817.1	86.6557	transcriptional regulator ATRX-like, partial [Limulus polyphemus]
uce-1254		XP_022245989.1	85.5001	chromodomain-helicase-DNA-binding protein 7-like isoform X4 [Limulus polyphemus]
uce-1254		XP_022245988.1	85.5001	chromodomain-helicase-DNA-binding protein 7-like isoform X2 [Limulus polyphemus]
uce-1254		XP_022245987.1	85.5001	chromodomain-helicase-DNA-binding protein 7-like isoform X1 [Limulus polyphemus]
uce-1254		XP_022245986.1	85.5001	chromodomain-helicase-DNA-binding protein 7-like isoform X1 [Limulus polyphemus]
uce-1254		XP_013778295.1	85.5001	chromodomain-helicase-DNA-binding protein 7-like isoform X3 [Limulus polyphemus]
uce-1254		KFM67843.1	84.7297	DNA helicase INO80, partial [Stegodyphus mimosarum]
uce-1254		KFM65528.1	83.5741	SWI/SNF-related matrix-associated actin-dependent regulator of chromatin subfamily A containing DEAD/H box 1, partial [Stegodyphus mimosarum]
uce-1254		XP_015918939.1	80.4925	SWI/SNF-related matrix-associated actin-dependent regulator of chromatin subfamily A containing DEAD/H box 1 homolog isoform X2 [Parasteatoda tepidariorum]
uce-1254		XP_015918938.1	80.4925	SWI/SNF-related matrix-associated actin-dependent regulator of chromatin subfamily A containing DEAD/H box 1 homolog isoform X1 [Parasteatoda tepidariorum]
uce-1254		XP_002400839.1	78.9518	DNA repair and recombination protein RAD54B, putative [Ixodes scapularis]
uce-1254		KFM63248.1	78.5666	SWI/SNF-related matrix-associated actin-dependent regulator of chromatin subfamily A member 5, partial [Stegodyphus mimosarum]
uce-1254		XP_002434428.1	75.0998	conserved hypothetical protein [Ixodes scapularis]
uce-1254		XP_013789929.2	70.0922	SWI/SNF-related matrix-associated actin-dependent regulator of chromatin subfamily A member 5-like [Limulus polyphemus]
uce-1274	ctl	XP_013781146.1	114.775	DCN1-like protein 3 [Limulus polyphemus]
uce-1274		XP_015903481.1	121.324	DCN1-like protein 3 [Parasteatoda tepidariorum]
uce-1274		KFM79080.1	123.25	DCN1-like protein 3, partial [Stegodyphus mimosarum]
uce-1285		XP_022246811.1	61.2326	neurobeachin-like [Limulus polyphemus]
uce-1285		XP_013791939.2	72.7886	lipopolysaccharide-responsive and beige-like anchor protein, partial [Limulus polyphemus]
uce-1285		XP_021001513.1	83.1889	neurobeachin [Parasteatoda tepidariorum]
uce-1285		KFM61720.1	83.1889	Neurobeachin, partial [Stegodyphus mimosarum]
uce-1285		XP_015916353.1	83.5741	neurobeachin-like, partial [Parasteatoda tepidariorum]
uce-1306	ctl	XP_022248878.1	87.4261	UDP-glucose:glycoprotein glucosyltransferase 1-like isoform X3 [Limulus polyphemus]
uce-1306		XP_002407508.1	81.6481	killer toxin-resistance protein, putative [Ixodes scapularis]
uce-1306		KFM80237.1	81.2629	UDP-glucose:glycoprotein glucosyltransferase 1, partial [Stegodyphus mimosarum]
uce-1306		XP_021002653.1	77.411	UDP-glucose:glycoprotein glucosyltransferase 1-like [Parasteatoda tepidariorum]
uce-1308	ctl	XP_022245435.1	64.6994	F-box/SPRY domain-containing protein 1-like isoform X1 [Limulus polyphemus]
uce-1308		KFM82020.1	65.4698	hypothetical protein X975_19303, partial [Stegodyphus mimosarum]
uce-1308		XP_013782867.1	65.855	F-box/SPRY domain-containing protein 1-like [Limulus polyphemus]
uce-1308		XP_015923059.1	65.855	F-box/SPRY domain-containing protein 1-like isoform X1 [Parasteatoda tepidariorum]
uce-1308		XP_022236740.1	160.229	protein gustavus-like [Limulus polyphemus]
uce-1308		XP_015903195.1	162.54	protein gustavus-like [Parasteatoda tepidariorum]
uce-1308		KFM76860.1	170.629	SPRY domain-containing SOCS box protein 1, partial [Stegodyphus mimosarum]
uce-1347	paralogs	KFM67267.1	102.834	Catenin delta-2, partial [Stegodyphus mimosarum]
uce-1347		XP_022244183.1	101.679	catenin delta-2-like isoform X5 [Limulus polyphemus]
uce-1347		XP_002416547.1	97.0561	armadillo repeat protein, putative [Ixodes scapularis]
uce-1347		XP_022239801.1	93.9745	catenin delta-2-like isoform X1 [Limulus polyphemus]
uce-1347		XP_022256138.1	92.8189	DNA-directed RNA polymerase II subunit 1-like, partial [Limulus polyphemus]
uce-1347		XP_015927845.1	91.2781	catenin delta-2 [Parasteatoda tepidariorum]
uce-1368	same @ 2596	XP_022244023.1	66.6254	catenin beta-like isoform X1 [Limulus polyphemus]
uce-1368		XP_015914886.1	82.4185	armadillo segment polarity protein-like isoform X1 [Parasteatoda tepidariorum]
uce-1368		KFM82593.1	82.4185	Armadillo segment polarity protein, partial [Stegodyphus mimosarum]
uce-1368		XP_013783265.1	84.7297	armadillo segment polarity protein-like isoform X1 [Limulus polyphemus]
uce-1369		XP_013783265.1	97.4413	armadillo segment polarity protein-like isoform X1 [Limulus polyphemus]
uce-1369		XP_002414424.1	97.4413	armadillo, putative, partial [Ixodes scapularis]
uce-1369		XP_015914901.1	95.9005	armadillo segment polarity protein-like isoform X2 [Parasteatoda tepidariorum]
uce-1369		XP_015914894.1	95.9005	armadillo segment polarity protein-like isoform X1 [Parasteatoda tepidariorum]
uce-1369		XP_015914886.1	95.9005	armadillo segment polarity protein-like isoform X1 [Parasteatoda tepidariorum]
uce-1369		KFM82593.1	93.9745	Armadillo segment polarity protein, partial [Stegodyphus mimosarum]
uce-1369		XP_022244023.1	93.2041	catenin beta-like isoform X1 [Limulus polyphemus]
uce-1369		XP_022244022.1	93.2041	catenin beta-like isoform X1 [Limulus polyphemus]
uce-1369		XP_022244021.1	93.2041	catenin beta-like isoform X1 [Limulus polyphemus]
uce-1369		XP_013776640.1	93.2041	catenin beta-like isoform X2 [Limulus polyphemus]
uce-1372	ctl	KFM67046.1	108.997	Hypothetical protein phosphatase 2C T23F11.1, partial [Stegodyphus mimosarum]
uce-1372		XP_015918850.1	107.071	probable protein phosphatase 2C T23F11.1 [Parasteatoda tepidariorum]
uce-1372		XP_022257166.1	92.8189	probable protein phosphatase 2C T23F11.1 isoform X4 [Limulus polyphemus]
uce-1372		XP_002407635.1	91.2781	PP2C, putative [Ixodes scapularis]
uce-1372		XP_022257927.1	84.3445	probable protein phosphatase 2C T23F11.1 isoform X4 [Limulus polyphemus]
uce-1382	ctl	KFM82283.1	108.612	Alpha-aminoadipic semialdehyde dehydrogenase, partial [Stegodyphus mimosarum]
uce-1382		XP_015926392.1	115.161	alpha-aminoadipic semialdehyde dehydrogenase-like [Parasteatoda tepidariorum]
uce-1382		XP_013780249.1	116.701	alpha-aminoadipic semialdehyde dehydrogenase-like [Limulus polyphemus]
uce-1408	ctl	XP_013792338.1	125.946	proteasome subunit beta type-3-like [Limulus polyphemus]
uce-1408		KFM57092.1	114.005	Proteasome subunit beta type-3, partial [Stegodyphus mimosarum]
uce-1408		XP_002406585.1	100.908	20S proteasome, regulatory subunit beta, putative [Ixodes scapularis]
uce-1408		XP_015911341.1	96.2857	proteasome subunit beta type-3-like isoform X2 [Parasteatoda tepidariorum]
uce-1408		XP_015911333.1	96.2857	proteasome subunit beta type-3-like isoform X1 [Parasteatoda tepidariorum]
uce-1411	ctl	KFM81569.1	100.138	putative cytosolic iron-sulfur protein assembly protein CIAO1, partial [Stegodyphus mimosarum]
uce-1411		XP_015911178.1	102.449	probable cytosolic iron-sulfur protein assembly protein CIAO1 homolog [Parasteatoda tepidariorum]
uce-1439	paralogs	XP_021002048.1	59.3066	LOW QUALITY PROTEIN: ATP-binding cassette sub-family D member 3-like [Parasteatoda tepidariorum]
uce-1439		XP_013786213.1	62.3882	ATP-binding cassette sub-family D member 1-like [Limulus polyphemus]
uce-1439		XP_015927732.1	63.1586	ATP-binding cassette sub-family D member 2 [Parasteatoda tepidariorum]
uce-1439		XP_015930768.1	67.781	ATP-binding cassette sub-family D member 3-like [Parasteatoda tepidariorum]
uce-1439		KFM62420.1	78.5666	ATP-binding cassette sub-family D member 3, partial [Stegodyphus mimosarum]
uce-1439		XP_013781261.1	78.5666	ATP-binding cassette sub-family D member 3-like [Limulus polyphemus]
uce-1448	ctl	XP_021000380.1	87.0409	neuropathy target esterase sws [Parasteatoda tepidariorum]
uce-1448		KFM61021.1	91.2781	Neuropathy target esterase, partial [Stegodyphus mimosarum]
uce-1448		XP_022239982.1	101.293	neuropathy target esterase sws-like isoform X1 [Limulus polyphemus]
uce-1453	paralogs	KFM68614.1	45.0542	Sodium channel protein para, partial [Stegodyphus mimosarum]
uce-1453		XP_015931258.2	47.3654	LOW QUALITY PROTEIN: sodium channel protein para [Parasteatoda tepidariorum]
uce-1453		XP_015927082.1	43.5134	sodium channel protein para-like [Parasteatoda tepidariorum]
uce-1453		XP_022248143.1	42.3578	sodium channel protein para-like isoform X2 [Limulus polyphemus]
uce-1453		XP_022248142.1	42.3578	sodium channel protein para-like isoform X1 [Limulus polyphemus]
uce-1453		XP_022248144.1	42.3578	sodium channel protein para-like isoform X3 [Limulus polyphemus]
uce-1453		XP_022248145.1	42.3578	sodium channel protein para-like isoform X4 [Limulus polyphemus]
uce-1453		KFM78741.1	42.3578	Sodium channel protein para, partial [Stegodyphus mimosarum]
uce-1453		XP_022256515.1	41.9726	sodium channel protein para-like isoform X2 [Limulus polyphemus]
uce-1453		XP_022256512.1	41.9726	sodium channel protein para-like isoform X1 [Limulus polyphemus]
uce-1453		XP_022256534.1	41.9726	sodium channel protein para-like isoform X6 [Limulus polyphemus]
uce-1453		XP_022256519.1	41.9726	sodium channel protein para-like isoform X3 [Limulus polyphemus]
uce-1453		XP_022256525.1	41.9726	sodium channel protein para-like isoform X4 [Limulus polyphemus]
uce-1453		XP_022256531.1	41.9726	sodium channel protein para-like isoform X5 [Limulus polyphemus]
uce-1453		XP_013785136.1	41.9726	sodium channel protein para-like, partial [Limulus polyphemus]
uce-1453		XP_002407119.1	41.5874	skeletal muscle sodium channel alpha subunit, putative, partial [Ixodes scapularis]
uce-1453		XP_022238318.1	41.9726	sodium channel protein para-like isoform X2 [Limulus polyphemus]
uce-1453		XP_022238311.1	41.9726	sodium channel protein para-like isoform X1 [Limulus polyphemus]
uce-1453		XP_022236849.1	38.891	sodium channel protein para-like [Limulus polyphemus]
uce-1453		XP_022243584.1	40.0466	sodium channel protein para-like [Limulus polyphemus]
uce-1453		KFM60100.1	29.6462	Sodium channel protein 60E, partial [Stegodyphus mimosarum]
uce-1453		XP_015925585.1	28.1054	sodium channel protein para-like [Parasteatoda tepidariorum]
uce-1453		XP_015914101.1	29.6462	sodium channel protein 60E [Parasteatoda tepidariorum]
uce-1455		XP_015908039.1	64.3142	1-phosphatidylinositol 4,5-bisphosphate phosphodiesterase epsilon-1 [Parasteatoda tepidariorum]
uce-1455		KFM62794.1	72.0182	1-phosphatidylinositol-4,5-bisphosphate phosphodiesterase epsilon-1, partial [Stegodyphus mimosarum]
uce-1464		XP_022236784.1	76.2554	myotubularin-related protein 8-like, partial [Limulus polyphemus]
uce-1464		XP_021004531.1	82.4185	myotubularin-related protein 6 [Parasteatoda tepidariorum]
uce-1464		KFM81390.1	85.1149	Myotubularin-related protein 8, partial [Stegodyphus mimosarum]
uce-1469	ctl	KFM57871.1	81.2629	BTB/POZ domain-containing protein 3, partial [Stegodyphus mimosarum]
uce-1469		XP_013775195.1	82.4185	BTB/POZ domain-containing protein 6-like isoform X1 [Limulus polyphemus]
uce-1469		XP_015907566.1	82.8037	BTB/POZ domain-containing protein 6-B-like [Parasteatoda tepidariorum]
uce-1469		XP_013792151.1	158.303	BTB/POZ domain-containing protein 2-like [Limulus polyphemus]
uce-1469		KFM81331.1	164.851	BTB/POZ domain-containing protein 2, partial [Stegodyphus mimosarum]
uce-1469		XP_015919763.1	164.851	BTB/POZ domain-containing protein 2 [Parasteatoda tepidariorum]
uce-1498		XP_015916009.1	106.686	COP9 signalosome complex subunit 1-like isoform X1 [Parasteatoda tepidariorum]
uce-1498		KFM79956.1	110.538	COP9 signalosome complex subunit 1, partial [Stegodyphus mimosarum]
uce-1501	ctl	KFM61068.1	104.375	Polyphosphoinositide phosphatase, partial [Stegodyphus mimosarum]
uce-1501		XP_002434910.1	113.235	SAC domain-containing protein, putative, partial [Ixodes scapularis]
uce-1501		XP_015918441.1	114.775	polyphosphoinositide phosphatase [Parasteatoda tepidariorum]
uce-1507	paralogs	XP_015923373.1	46.9802	glutamate receptor ionotropic, kainate 2 isoform X1 [Parasteatoda tepidariorum]
uce-1507		XP_015923374.1	46.9802	glutamate receptor ionotropic, kainate 2 isoform X2 [Parasteatoda tepidariorum]
uce-1507		KFM80329.1	46.9802	Glutamate receptor, ionotropic kainate 2, partial [Stegodyphus mimosarum]
uce-1507		XP_015922166.1	46.9802	glutamate receptor ionotropic, kainate 1-like [Parasteatoda tepidariorum]
uce-1507		XP_002415471.1	46.9802	EAA5, putative, partial [Ixodes scapularis]
uce-1507		KFM75323.1	45.4394	Glutamate receptor, ionotropic kainate 2, partial [Stegodyphus mimosarum]
uce-1507		XP_022237656.1	46.595	glutamate receptor ionotropic, kainate 2-like isoform X1 [Limulus polyphemus]
uce-1507		XP_022237657.1	46.595	glutamate receptor ionotropic, kainate 2-like isoform X2 [Limulus polyphemus]
uce-1507		XP_022237659.1	46.595	glutamate receptor ionotropic, kainate 2-like isoform X3 [Limulus polyphemus]
uce-1507		XP_013792143.1	46.9802	glutamate receptor ionotropic, kainate 2-like, partial [Limulus polyphemus]
uce-1507		XP_013789376.2	28.8758	glutamate receptor ionotropic, kainate 2-like [Limulus polyphemus]
uce-1507		XP_013791388.2	28.8758	glutamate receptor ionotropic, kainate 2-like isoform X2 [Limulus polyphemus]
uce-1507		XP_015922296.1	28.8758	glutamate receptor ionotropic, kainate 2 [Parasteatoda tepidariorum]
uce-1507		XP_022255411.1	27.335	glutamate receptor ionotropic, kainate 2-like [Limulus polyphemus]
uce-1507		XP_022253148.1	29.6462	glutamate receptor ionotropic, kainate 2-like, partial [Limulus polyphemus]
uce-1507		XP_022241144.1	27.7202	glutamate receptor ionotropic, kainate 2-like [Limulus polyphemus]
uce-1507		KFM57368.1	27.335	Glutamate receptor, ionotropic kainate 2, partial [Stegodyphus mimosarum]
uce-1507		XP_022249395.1	27.335	glutamate receptor ionotropic, kainate 2-like [Limulus polyphemus]
uce-1507		KFM67217.1	23.483	Glutamate receptor, ionotropic kainate 2, partial [Stegodyphus mimosarum]
uce-1507		XP_022241842.1	25.7942	glutamate receptor ionotropic, kainate 2-like isoform X1 [Limulus polyphemus]
uce-1507		XP_022241844.1	25.7942	glutamate receptor ionotropic, kainate 2-like isoform X2 [Limulus polyphemus]
uce-1507		XP_022241843.1	25.7942	glutamate receptor ionotropic, kainate 2-like isoform X2 [Limulus polyphemus]
uce-1507		XP_015914480.1	25.7942	glutamate receptor ionotropic, kainate 2-like [Parasteatoda tepidariorum]
uce-1507		XP_015911050.1	23.483	glutamate receptor ionotropic, kainate 1-like [Parasteatoda tepidariorum]
uce-1507		XP_013787893.1	25.7942	glutamate receptor ionotropic, kainate 2-like [Limulus polyphemus]
uce-1507		KFM73260.1	25.409	Glutamate receptor, ionotropic kainate 2, partial [Stegodyphus mimosarum]
uce-1507		XP_002410444.1	27.7202	excitatory amino acid transporter, putative [Ixodes scapularis]
uce-1507		KFM59945.1	29.261	Glutamate receptor, ionotropic kainate 2, partial [Stegodyphus mimosarum]
uce-1507		XP_022247281.1	29.6462	glutamate receptor ionotropic, kainate 1-like [Limulus polyphemus]
uce-1507		XP_015925654.1	25.409	glutamate receptor ionotropic, kainate 2 isoform X1 [Parasteatoda tepidariorum]
uce-1507		XP_022248258.1	27.7202	glutamate receptor ionotropic, kainate 2-like isoform X3 [Limulus polyphemus]
uce-1507		XP_002409756.1	27.335	ionotropic glutamate receptor, putative [Ixodes scapularis]
uce-1507		XP_022243231.1	28.1054	glutamate receptor ionotropic, kainate 2-like isoform X1 [Limulus polyphemus]
uce-1507		XP_013794351.2	23.0978	glutamate receptor ionotropic, kainate 2-like [Limulus polyphemus]
uce-1547	ctl	KFM78427.1	153.295	E3 ubiquitin-protein ligase RING2-A, partial [Stegodyphus mimosarum]
uce-1547		XP_015914323.1	153.295	E3 ubiquitin-protein ligase RING2 [Parasteatoda tepidariorum]
uce-1547		XP_022255979.1	153.68	E3 ubiquitin-protein ligase RING2-like [Limulus polyphemus]
uce-1552	same @ 5403	XP_002400699.1	133.265	conserved hypothetical protein [Ixodes scapularis]
uce-1552		XP_015916018.2	135.576	striatin-interacting protein 1 homolog [Parasteatoda tepidariorum]
uce-1552		KFM82509.1	137.117	Protein FAM40A, partial [Stegodyphus mimosarum]
uce-1559	ctl	XP_013787894.1	54.299	sorting nexin-3-like [Limulus polyphemus]
uce-1559		XP_002409435.1	60.8474	sorting nexin, putative [Ixodes scapularis]
uce-1559		XP_013782836.1	63.5438	sorting nexin-3-like [Limulus polyphemus]
uce-1559		KFM67926.1	64.6994	Sorting nexin-12, partial [Stegodyphus mimosarum]
uce-1559		XP_015929976.1	64.6994	sorting nexin-3 isoform X1 [Parasteatoda tepidariorum]
uce-1571	paralogs	XP_013776112.1	85.5001	splicing factor U2AF 50 kDa subunit-like [Limulus polyphemus]
uce-1571		XP_013774977.1	85.5001	splicing factor U2AF 50 kDa subunit-like isoform X1 [Limulus polyphemus]
uce-1571		KFM61156.1	86.6557	Splicing factor U2AF subunit, partial [Stegodyphus mimosarum]
uce-1571		XP_015919835.1	86.6557	splicing factor U2AF 50 kDa subunit [Parasteatoda tepidariorum]
uce-1582	ctl	XP_013789852.1	101.679	protein unc-13 homolog A-like, partial [Limulus polyphemus]
uce-1582		XP_002400331.1	103.99	Munc13-3, putative, partial [Ixodes scapularis]
uce-1582		KFM78554.1	105.145	Protein unc-13-like protein, partial [Stegodyphus mimosarum]
uce-1582		XP_015913830.2	105.145	protein unc-13 homolog A-like [Parasteatoda tepidariorum]
uce-1584	paralogs	KFM64026.1	108.997	Protein argonaute-2, partial [Stegodyphus mimosarum]
uce-1584		XP_015929998.1	107.842	protein argonaute-2-like isoform X2 [Parasteatoda tepidariorum]
uce-1584		XP_022254839.1	107.071	protein argonaute-2-like [Limulus polyphemus]
uce-1584		XP_002413188.1	107.071	translation initiation factor 2C, putative [Ixodes scapularis]
uce-1584		KFM56904.1	105.916	Protein argonaute-3, partial [Stegodyphus mimosarum]
uce-1584		XP_022248353.1	105.145	protein argonaute-2-like [Limulus polyphemus]
uce-1584		KFM79527.1	64.6994	Protein argonaute-3, partial [Stegodyphus mimosarum]
uce-1585	paralogs	XP_022254839.1	69.707	protein argonaute-2-like [Limulus polyphemus]
uce-1585		XP_022248353.1	69.707	protein argonaute-2-like [Limulus polyphemus]
uce-1585		XP_002413188.1	69.707	translation initiation factor 2C, putative [Ixodes scapularis]
uce-1585		KFM64026.1	69.707	Protein argonaute-2, partial [Stegodyphus mimosarum]
uce-1585		XP_015929998.1	69.707	protein argonaute-2-like isoform X2 [Parasteatoda tepidariorum]
uce-1585		XP_015929997.1	69.707	protein argonaute-2-like isoform X1 [Parasteatoda tepidariorum]
uce-1601	ctl	XP_013794808.1	114.005	DNA-directed RNA polymerase II subunit RPB3-like [Limulus polyphemus]
uce-1601		XP_002415909.1	116.701	RNA polymerase II, subunit POLR2C/RPB3, putative [Ixodes scapularis]
uce-1601		XP_015928678.1	118.242	DNA-directed RNA polymerase II subunit RPB3 [Parasteatoda tepidariorum]
uce-1601		KFM80578.1	120.939	DNA-directed RNA polymerase II subunit RPB3, partial [Stegodyphus mimosarum]
uce-1602		KFM80578.1	110.538	DNA-directed RNA polymerase II subunit RPB3, partial [Stegodyphus mimosarum]
uce-1602		XP_015928679.1	108.227	DNA-directed RNA polymerase II subunit RPB3 [Parasteatoda tepidariorum]
uce-1602		XP_015928678.1	108.227	DNA-directed RNA polymerase II subunit RPB3 [Parasteatoda tepidariorum]
uce-1602		XP_002415909.1	107.071	RNA polymerase II, subunit POLR2C/RPB3, putative [Ixodes scapularis]
uce-1602		XP_013794808.1	104.375	DNA-directed RNA polymerase II subunit RPB3-like [Limulus polyphemus]
uce-1605	ctl	XP_013794812.1	168.703	40S ribosomal protein SA-like [Limulus polyphemus]
uce-1605		XP_021004466.1	164.851	40S ribosomal protein SA [Parasteatoda tepidariorum]
uce-1609	ctl	XP_002415239.1	140.584	eph receptor tyrosine kinase, putative [Ixodes scapularis]
uce-1609		XP_022246398.1	140.969	ephrin type-B receptor 3-like, partial [Limulus polyphemus]
uce-1609		XP_013786838.2	142.124	ephrin type-B receptor 2-like, partial [Limulus polyphemus]
uce-1609		XP_022244546.1	142.51	ephrin type-B receptor 1-B-like isoform X1 [Limulus polyphemus]
uce-1609		XP_022238397.1	142.51	ephrin type-B receptor 1-B-like [Limulus polyphemus]
uce-1609		XP_022243643.1	143.665	ephrin type-A receptor 4-like isoform X1 [Limulus polyphemus]
uce-1609		XP_022239231.1	143.665	ephrin type-B receptor 1-B-like [Limulus polyphemus]
uce-1609		XP_013792888.1	144.821	ephrin type-B receptor 1-like, partial [Limulus polyphemus]
uce-1609		XP_015922717.1	149.443	ephrin type-B receptor 1-B isoform X1 [Parasteatoda tepidariorum]
uce-1613	paralogs	XP_021001466.1	113.235	SH3 domain-containing RING finger protein 3 [Parasteatoda tepidariorum]
uce-1613		KFM81841.1	112.849	SH3 domain-containing RING finger protein 3, partial [Stegodyphus mimosarum]
uce-1613		XP_022256645.1	112.079	SH3 domain-containing RING finger protein 3-like, partial [Limulus polyphemus]
uce-1613		XP_002416605.1	108.997	conserved hypothetical protein, partial [Ixodes scapularis]
uce-1620	ctl	XP_002413267.1	66.6254	translation elongation factor EF-1 alpha/Tu, putative [Ixodes scapularis]
uce-1620		XP_021001963.1	67.781	HBS1-like protein [Parasteatoda tepidariorum]
uce-1620		XP_013773845.1	68.1662	HBS1-like protein [Limulus polyphemus]
uce-1620		XP_022244630.1	102.449	eukaryotic peptide chain release factor GTP-binding subunit ERF3A-like [Limulus polyphemus]
uce-1620		XP_013776208.1	102.449	eukaryotic peptide chain release factor GTP-binding subunit ERF3A-like isoform X1 [Limulus polyphemus]
uce-1620		XP_002434554.1	107.457	translation elongation factor EF-1 alpha/Tu, putative [Ixodes scapularis]
uce-1620		KFM61899.1	107.457	Eukaryotic peptide chain release factor GTP-binding subunit ERF3A, partial [Stegodyphus mimosarum]
uce-1620		XP_015930491.1	107.457	eukaryotic peptide chain release factor GTP-binding subunit ERF3A-like [Parasteatoda tepidariorum]
uce-1639	ctl	XP_015903334.1	83.1889	ATP-dependent RNA helicase DDX39A-like [Parasteatoda tepidariorum]
uce-1639		XP_013787089.2	82.0333	ATP-dependent RNA helicase DDX39A, partial [Limulus polyphemus]
uce-1639		KFM82349.1	82.0333	Spliceosome RNA helicase DDX39B, partial [Stegodyphus mimosarum]
uce-1646		XP_022241342.1	128.642	LOW QUALITY PROTEIN: E3 ubiquitin-protein ligase HECTD1-like [Limulus polyphemus]
uce-1646		XP_015925425.1	128.642	E3 ubiquitin-protein ligase HECTD1 isoform X1 [Parasteatoda tepidariorum]
uce-1647	ctl	XP_015925425.1	125.561	E3 ubiquitin-protein ligase HECTD1 isoform X1 [Parasteatoda tepidariorum]
uce-1647		XP_022241342.1	127.102	LOW QUALITY PROTEIN: E3 ubiquitin-protein ligase HECTD1-like [Limulus polyphemus]
uce-1654	ctl	XP_022250645.1	97.4413	drebrin-like protein isoform X2 [Limulus polyphemus]
uce-1654		XP_013782619.1	97.4413	drebrin-like protein B isoform X1 [Limulus polyphemus]
uce-1654		XP_021000384.1	97.0561	drebrin-like protein [Parasteatoda tepidariorum]
uce-1654		XP_002408275.1	96.6709	conserved hypothetical protein, partial [Ixodes scapularis]
uce-1654		KFM82126.1	94.7449	Drebrin-like protein, partial [Stegodyphus mimosarum]
uce-1654		XP_022256004.1	70.8626	src substrate cortactin-like [Limulus polyphemus]
uce-1654		XP_022236226.1	70.0922	src substrate cortactin-like [Limulus polyphemus]
uce-1654		XP_015909936.1	67.0106	src substrate cortactin-like isoform X5 [Parasteatoda tepidariorum]
uce-1654		XP_015909935.1	67.0106	src substrate cortactin-like isoform X4 [Parasteatoda tepidariorum]
uce-1654		XP_015909934.1	67.0106	src substrate protein p85-like isoform X3 [Parasteatoda tepidariorum]
uce-1654		XP_015909933.1	67.0106	src substrate cortactin-like isoform X2 [Parasteatoda tepidariorum]
uce-1654		XP_015909932.1	67.0106	src substrate protein p85-like isoform X1 [Parasteatoda tepidariorum]
uce-1654		XP_015909931.1	67.0106	src substrate protein p85-like isoform X1 [Parasteatoda tepidariorum]
uce-1656	ctl	XP_013775820.1	114.39	poly(U)-binding-splicing factor half pint-like isoform X1 [Limulus polyphemus]
uce-1656		XP_002408027.1	115.931	RNA-binding protein, putative, partial [Ixodes scapularis]
uce-1656		XP_013772536.1	118.242	poly(U)-binding-splicing factor PUF60-like [Limulus polyphemus]
uce-1656		KFM76220.1	122.094	Poly(U)-binding-splicing factor half pint, partial [Stegodyphus mimosarum]
uce-1656		XP_015908873.1	122.094	poly(U)-binding-splicing factor PUF60 isoform X1 [Parasteatoda tepidariorum]
uce-1672	same @ 2668	XP_002412040.1	102.064	AP-2 complex subunit beta-1, putative [Ixodes scapularis]
uce-1672		XP_013791193.1	110.153	AP-1 complex subunit beta-1-like [Limulus polyphemus]
uce-1672		KFM70822.1	110.153	AP-1 complex subunit beta-1, partial [Stegodyphus mimosarum]
uce-1672		XP_015907384.1	113.62	AP-1 complex subunit beta-1 [Parasteatoda tepidariorum]
uce-1682		XP_022244560.1	88.1965	pre-mRNA 3' end processing protein WDR33-like [Limulus polyphemus]
uce-1682		XP_015930832.1	91.6633	pre-mRNA 3' end processing protein WDR33 [Parasteatoda tepidariorum]
uce-1682		KFM79198.1	92.0485	hypothetical protein X975_27120, partial [Stegodyphus mimosarum]
uce-1683	ctl	XP_022244560.1	101.293	pre-mRNA 3' end processing protein WDR33-like [Limulus polyphemus]
uce-1683		KFM79198.1	107.457	hypothetical protein X975_27120, partial [Stegodyphus mimosarum]
uce-1683		XP_015930832.1	107.457	pre-mRNA 3' end processing protein WDR33 [Parasteatoda tepidariorum]
uce-1692	ctl	KFM73694.1	68.1662	Phosphatidylinositol-4,5-bisphosphate 3-kinase catalytic subunit alpha isoform, partial [Stegodyphus mimosarum]
uce-1692		XP_002415312.1	80.8777	phosphatidylinositol 3-kinase catalytic subunit, putative, partial [Ixodes scapularis]
uce-1692		XP_013776261.1	123.635	phosphatidylinositol 4,5-bisphosphate 3-kinase catalytic subunit alpha isoform-like [Limulus polyphemus]
uce-1692		XP_021004440.1	126.716	phosphatidylinositol 4,5-bisphosphate 3-kinase catalytic subunit alpha isoform-like [Parasteatoda tepidariorum]
uce-1693		KFM73694.1	107.457	Phosphatidylinositol-4,5-bisphosphate 3-kinase catalytic subunit alpha isoform, partial [Stegodyphus mimosarum]
uce-1693		XP_021004440.1	108.227	phosphatidylinositol 4,5-bisphosphate 3-kinase catalytic subunit alpha isoform-like [Parasteatoda tepidariorum]
uce-1693		XP_002415312.1	110.923	phosphatidylinositol 3-kinase catalytic subunit, putative, partial [Ixodes scapularis]
uce-1693		XP_013776261.1	112.079	phosphatidylinositol 4,5-bisphosphate 3-kinase catalytic subunit alpha isoform-like [Limulus polyphemus]
uce-1708	ctl	XP_015907787.1	91.2781	protein transport protein Sec61 subunit alpha [Parasteatoda tepidariorum]
uce-1708		XP_013789199.1	93.5893	protein transport protein Sec61 subunit alpha-like [Limulus polyphemus]
uce-1708		XP_013775305.1	93.5893	protein transport protein Sec61 subunit alpha [Limulus polyphemus]
uce-1708		XP_002403755.1	93.5893	protein transport protein SEC61 alpha subunit, putative [Ixodes scapularis]
uce-1708		KFM79307.1	93.5893	Protein transport protein Sec61 subunit alpha isoform 2, partial [Stegodyphus mimosarum]
uce-1715	ctl	XP_013781343.1	108.612	LOW QUALITY PROTEIN: protein furry-like [Limulus polyphemus]
uce-1715		XP_002406892.1	114.005	HEAT repeat-containing protein [Ixodes scapularis]
uce-1715		XP_015908646.1	119.398	protein furry-like [Parasteatoda tepidariorum]
uce-1715		KFM83448.1	123.635	Protein furry, partial [Stegodyphus mimosarum]
uce-1718		XP_002406892.1	129.028	HEAT repeat-containing protein [Ixodes scapularis]
uce-1718		XP_013781343.1	134.035	LOW QUALITY PROTEIN: protein furry-like [Limulus polyphemus]
uce-1718		XP_015908646.1	140.969	protein furry-like [Parasteatoda tepidariorum]
uce-1718		KFM83448.1	145.976	Protein furry, partial [Stegodyphus mimosarum]
uce-1720		XP_015908646.1	232.646	protein furry-like [Parasteatoda tepidariorum]
uce-1720		XP_013781343.1	201.445	LOW QUALITY PROTEIN: protein furry-like [Limulus polyphemus]
uce-1720		XP_002406892.1	173.326	HEAT repeat-containing protein [Ixodes scapularis]
uce-1720		KFM83447.1	85.5001	Protein furry, partial [Stegodyphus mimosarum]
uce-1721		XP_015908646.1	233.417	protein furry-like [Parasteatoda tepidariorum]
uce-1721		XP_013781343.1	208.764	LOW QUALITY PROTEIN: protein furry-like [Limulus polyphemus]
uce-1721		XP_002406892.1	196.823	HEAT repeat-containing protein [Ixodes scapularis]
uce-1725	ctl	XP_002404468.1	88.9669	conserved hypothetical protein, partial [Ixodes scapularis]
uce-1725		XP_015923742.1	89.3521	RUS1 family protein C16orf58 homolog [Parasteatoda tepidariorum]
uce-1725		KFM62107.1	89.7373	hypothetical protein X975_25741, partial [Stegodyphus mimosarum]
uce-1725		XP_022249993.1	92.4337	RUS1 family protein C16orf58-like isoform X1 [Limulus polyphemus]
uce-1743	ctl	XP_015924886.1	129.798	polycomb protein SCMH1 isoform X1 [Parasteatoda tepidariorum]
uce-1743		XP_002435493.1	138.658	polycomb protein SCMH1, putative, partial [Ixodes scapularis]
uce-1743		XP_022247720.1	144.436	polycomb protein Scm-like [Limulus polyphemus]
uce-1743		XP_015925676.1	145.591	polycomb protein SCMH1 isoform X1 [Parasteatoda tepidariorum]
uce-1743		XP_013775899.2	155.221	polycomb protein SCMH1-like isoform X1 [Limulus polyphemus]
uce-1743		KFM83575.1	155.606	Polycomb protein SCMH1, partial [Stegodyphus mimosarum]
uce-1744	ctl	XP_015924509.2	95.5153	serine/threonine-protein kinase 40 [Parasteatoda tepidariorum]
uce-1744		KFM79511.1	98.5969	Serine/threonine-protein kinase 40, partial [Stegodyphus mimosarum]
uce-1744		XP_002414766.1	100.523	ser/thr protein kinase-lyk4, putative [Ixodes scapularis]
uce-1744		XP_022239433.1	102.834	serine/threonine-protein kinase 40-like [Limulus polyphemus]
uce-1752		XP_015920056.1	64.6994	116 kDa U5 small nuclear ribonucleoprotein component-like [Parasteatoda tepidariorum]
uce-1752		XP_013784466.1	119.398	translation elongation factor 2-like [Limulus polyphemus]
uce-1752		XP_013782396.1	119.398	elongation factor 2 [Limulus polyphemus]
uce-1752		XP_002400289.1	123.635	elongation factor, putative [Ixodes scapularis]
uce-1752		XP_015931017.1	125.561	elongation factor 2 [Parasteatoda tepidariorum]
uce-1752		KFM81685.1	129.413	Elongation factor 2, partial [Stegodyphus mimosarum]
uce-1753	ctl	XP_015931017.1	130.954	elongation factor 2 [Parasteatoda tepidariorum]
uce-1753		XP_013784466.1	129.028	translation elongation factor 2-like [Limulus polyphemus]
uce-1753		XP_002400289.1	128.642	elongation factor, putative [Ixodes scapularis]
uce-1753		XP_013782396.1	127.102	elongation factor 2 [Limulus polyphemus]
uce-1763	ctl	XP_002407240.1	85.1149	protein transport protein Sec31A, putative, partial [Ixodes scapularis]
uce-1763		XP_021001566.1	97.8265	protein transport protein Sec31A-like [Parasteatoda tepidariorum]
uce-1763		XP_013780411.2	102.834	protein transport protein Sec31A-like [Limulus polyphemus]
uce-1763		KFM73376.1	104.375	hypothetical protein X975_10054, partial [Stegodyphus mimosarum]
uce-1768	paralogs	XP_013784079.1	90.8929	adapter molecule Crk-like isoform X1 [Limulus polyphemus]
uce-1768		XP_013781887.1	105.145	adapter molecule Crk-like [Limulus polyphemus]
uce-1768		XP_002410940.1	105.145	adaptor protein Crk, putative, partial [Ixodes scapularis]
uce-1768		XP_013789102.1	106.686	adapter molecule Crk-like [Limulus polyphemus]
uce-1768		XP_013791188.1	107.071	adapter molecule Crk-like isoform X1 [Limulus polyphemus]
uce-1768		KFM59908.1	107.071	Adapter molecule Crk, partial [Stegodyphus mimosarum]
uce-1768		XP_015918364.1	111.694	adapter molecule Crk [Parasteatoda tepidariorum]
uce-1772	ctl	XP_002436065.1	201.445	RNA-binding protein Nova-1, putative, partial [Ixodes scapularis]
uce-1772		XP_013783582.1	203.756	RNA-binding protein Nova-2-like isoform X1 [Limulus polyphemus]
uce-1772		XP_022251783.1	204.142	RNA-binding protein Nova-1-like isoform X2 [Limulus polyphemus]
uce-1772		XP_022238664.1	204.527	RNA-binding protein Nova-1-like [Limulus polyphemus]
uce-1772		XP_013782650.1	214.927	RNA-binding protein Nova-1-like isoform X1 [Limulus polyphemus]
uce-1772		XP_015917970.1	216.083	RNA-binding protein Nova-1-like [Parasteatoda tepidariorum]
uce-1772		KFM79567.1	250.366	RNA-binding protein Nova-1, partial [Stegodyphus mimosarum]
uce-1792	paralogs	XP_015914853.1	115.931	uncharacterized protein LOC107445052 [Parasteatoda tepidariorum]
uce-1792		KFM82720.1	117.472	hypothetical protein X975_14293, partial [Stegodyphus mimosarum]
uce-1792		XP_002403501.1	121.709	suppressor of cytokine signaling-5, putative [Ixodes scapularis]
uce-1792		XP_013780541.1	124.79	suppressor of cytokine signaling 5-like [Limulus polyphemus]
uce-1794		KFM71067.1	93.5893	Actin-related protein 6, partial [Stegodyphus mimosarum]
uce-1794		XP_015918747.1	95.1301	actin-related protein 6 [Parasteatoda tepidariorum]
uce-1794		XP_013779892.1	95.5153	actin-related protein 6-like [Limulus polyphemus]
uce-1797	ctl	KFM73090.1	125.561	Ubiquitin carboxyl-terminal hydrolase 34, partial [Stegodyphus mimosarum]
uce-1797		XP_022239150.1	123.25	LOW QUALITY PROTEIN: ubiquitin carboxyl-terminal hydrolase 34-like [Limulus polyphemus]
uce-1797		XP_021004118.1	123.25	ubiquitin carboxyl-terminal hydrolase 34 [Parasteatoda tepidariorum]
uce-1797		XP_002407152.1	122.094	ubiquitin specific protease, putative [Ixodes scapularis]
uce-1801	ctl	KFM57000.1	64.3142	Vesicular inhibitory amino acid transporter, partial [Stegodyphus mimosarum]
uce-1801		XP_002413742.1	75.8702	amino acid transporter, putative [Ixodes scapularis]
uce-1801		XP_013787432.1	113.235	vesicular inhibitory amino acid transporter-like [Limulus polyphemus]
uce-1801		XP_015917789.1	115.161	vesicular inhibitory amino acid transporter-like [Parasteatoda tepidariorum]
uce-1803		XP_015917789.1	62.003	vesicular inhibitory amino acid transporter-like [Parasteatoda tepidariorum]
uce-1803		XP_013787432.1	79.337	vesicular inhibitory amino acid transporter-like [Limulus polyphemus]
uce-1803		XP_002413742.1	80.8777	amino acid transporter, putative [Ixodes scapularis]
uce-1804	ctl	XP_015913086.2	88.5817	transcriptional regulator ATRX homolog [Parasteatoda tepidariorum]
uce-1804		KFM57756.1	92.4337	Transcriptional regulator ATRX, partial [Stegodyphus mimosarum]
uce-1804		XP_013789249.1	97.8265	transcriptional regulator ATRX-like [Limulus polyphemus]
uce-1804		XP_002410509.1	102.064	conserved hypothetical protein [Ixodes scapularis]
uce-1804		XP_013792817.1	104.76	transcriptional regulator ATRX-like, partial [Limulus polyphemus]
uce-1804		XP_013794504.2	147.132	helicase ARIP4-like isoform X1 [Limulus polyphemus]
uce-1804		XP_022245505.1	148.288	LOW QUALITY PROTEIN: helicase ARIP4-like [Limulus polyphemus]
uce-1804		XP_002412008.1	150.984	steroid receptor-interacting snf2 domain protein, putative [Ixodes scapularis]
uce-1804		KFM79283.1	162.925	Helicase ARIP4, partial [Stegodyphus mimosarum]
uce-1804		XP_015918872.1	162.925	helicase ARIP4 [Parasteatoda tepidariorum]
uce-1804		XP_015904971.2	162.925	uncharacterized protein LOC107437471 [Parasteatoda tepidariorum]
uce-1810		XP_002400840.1	162.54	conserved hypothetical protein [Ixodes scapularis]
uce-1810		XP_015906134.1	185.652	ankyrin-3 [Parasteatoda tepidariorum]
uce-1810		XP_013787392.2	187.963	ankyrin-3-like [Limulus polyphemus]
uce-1810		KFM61071.1	196.438	putative ankyrin repeat protein, partial [Stegodyphus mimosarum]
uce-1812	ctl	XP_002400840.1	311.227	conserved hypothetical protein [Ixodes scapularis]
uce-1812		XP_015906134.1	337.421	ankyrin-3 [Parasteatoda tepidariorum]
uce-1812		XP_013787392.2	348.206	ankyrin-3-like [Limulus polyphemus]
uce-1812		KFM61071.1	361.303	putative ankyrin repeat protein, partial [Stegodyphus mimosarum]
uce-1824	ctl	XP_002412596.1	98.9821	threonyl-tRNA synthetase, putative, partial [Ixodes scapularis]
uce-1824		XP_015913259.1	100.908	threonine--tRNA ligase, cytoplasmic isoform X1 [Parasteatoda tepidariorum]
uce-1824		XP_022251643.1	102.449	threonine--tRNA ligase, cytoplasmic-like isoform X1 [Limulus polyphemus]
uce-1824		KFM74402.1	105.531	Threonine--tRNA ligase, cytoplasmic, partial [Stegodyphus mimosarum]
uce-1826	no annotation			no annotation
uce-1848	ctl	XP_002434448.1	169.859	antiviral helicase Slh1, putative [Ixodes scapularis]
uce-1848		XP_013782023.2	169.474	U5 small nuclear ribonucleoprotein 200 kDa helicase-like [Limulus polyphemus]
uce-1848		KFM69174.1	166.392	U5 small nuclear ribonucleoprotein helicase, partial [Stegodyphus mimosarum]
uce-1848		XP_015924847.1	164.851	U5 small nuclear ribonucleoprotein 200 kDa helicase-like [Parasteatoda tepidariorum]
uce-1848	same @ 2480	KFM77627.1	83.5741	Activating signal cointegrator 1 complex subunit 3, partial [Stegodyphus mimosarum]
uce-1848		XP_021003702.1	78.1814	activating signal cointegrator 1 complex subunit 3 [Parasteatoda tepidariorum]
uce-1848		XP_022238465.1	63.929	activating signal cointegrator 1 complex subunit 3-like [Limulus polyphemus]
uce-1849		XP_015924847.1	198.749	U5 small nuclear ribonucleoprotein 200 kDa helicase-like [Parasteatoda tepidariorum]
uce-1849		XP_013782023.2	197.978	U5 small nuclear ribonucleoprotein 200 kDa helicase-like [Limulus polyphemus]
uce-1849		KFM69174.1	195.282	U5 small nuclear ribonucleoprotein helicase, partial [Stegodyphus mimosarum]
uce-1849		XP_002434448.1	182.956	antiviral helicase Slh1, putative [Ixodes scapularis]
uce-1849		XP_022238465.1	98.9821	activating signal cointegrator 1 complex subunit 3-like [Limulus polyphemus]
uce-1849		XP_002414494.1	79.337	activating signal cointegrator 1 complex subunit 3, helc1, putative, partial [Ixodes scapularis]
uce-1849		KFM77627.1	73.1738	Activating signal cointegrator 1 complex subunit 3, partial [Stegodyphus mimosarum]
uce-1849		XP_021003702.1	67.781	activating signal cointegrator 1 complex subunit 3 [Parasteatoda tepidariorum]
uce-1850	ctl - should have been excluded	XP_002414494.1	65.855	activating signal cointegrator 1 complex subunit 3, helc1, putative, partial [Ixodes scapularis]
uce-1850		KFM77628.1	65.855	Activating signal cointegrator 1 complex subunit 3, partial [Stegodyphus mimosarum]
uce-1850		XP_022238465.1	70.0922	activating signal cointegrator 1 complex subunit 3-like [Limulus polyphemus]
uce-1850		XP_013782023.2	114.775	U5 small nuclear ribonucleoprotein 200 kDa helicase-like [Limulus polyphemus]
uce-1850		KFM69174.1	115.931	U5 small nuclear ribonucleoprotein helicase, partial [Stegodyphus mimosarum]
uce-1850		XP_015924847.1	115.931	U5 small nuclear ribonucleoprotein 200 kDa helicase-like [Parasteatoda tepidariorum]
uce-1850		XP_002434448.1	117.087	antiviral helicase Slh1, putative [Ixodes scapularis]
uce-1855	ctl	XP_002411511.1	81.6481	kalirin, putative, partial [Ixodes scapularis]
uce-1855		XP_022243783.1	85.1149	triple functional domain protein-like [Limulus polyphemus]
uce-1855		XP_022244114.1	86.6557	triple functional domain protein-like isoform X1 [Limulus polyphemus]
uce-1855		XP_015906119.1	95.5153	kalirin isoform X2 [Parasteatoda tepidariorum]
uce-1855		XP_015906118.1	95.5153	triple functional domain protein isoform X1 [Parasteatoda tepidariorum]
uce-1858	ctl	XP_002414073.1	64.3142	conserved hypothetical protein, partial [Ixodes scapularis]
uce-1858		KFM67652.1	75.485	MOB kinase activator-like 2, partial [Stegodyphus mimosarum]
uce-1858		XP_015930606.1	75.485	MOB kinase activator-like 2 isoform X5 [Parasteatoda tepidariorum]
uce-1858		XP_015930601.1	75.485	MOB kinase activator 2 isoform X1 [Parasteatoda tepidariorum]
uce-1862	ctl	XP_015917573.1	72.4034	PHD finger protein 14-like [Parasteatoda tepidariorum]
uce-1862		XP_022238240.1	73.559	PHD finger protein 14-like, partial [Limulus polyphemus]
uce-1873	ctl	KFM73350.1	115.546	Phosphatidylinositol 3-kinase catalytic subunit type 3, partial [Stegodyphus mimosarum]
uce-1873		XP_021001554.1	116.701	phosphatidylinositol 3-kinase catalytic subunit type 3-like [Parasteatoda tepidariorum]
uce-1873		XP_002409976.1	118.627	phosphatidylinositol 3-kinase class, putative, partial [Ixodes scapularis]
uce-1873		XP_022252339.1	119.783	phosphatidylinositol 3-kinase catalytic subunit type 3-like [Limulus polyphemus]
uce-1890	ctl	XP_013775675.1	117.857	small nuclear ribonucleoprotein Sm D2 [Limulus polyphemus]
uce-1890		XP_002411748.1	119.783	small nuclear ribonucleoprotein sm D2, putative [Ixodes scapularis]
uce-1890		KFM62717.1	119.783	putative small nuclear ribonucleoprotein Sm D2, partial [Stegodyphus mimosarum]
uce-1890		XP_021000086.1	119.783	small nuclear ribonucleoprotein Sm D2 [Parasteatoda tepidariorum]
uce-1891	ctl	XP_022247410.1	81.2629	transmembrane protein adipocyte-associated 1 homolog [Limulus polyphemus]
uce-1891		XP_002412502.1	86.2705	integral membrane protein GPR175, putative, partial [Ixodes scapularis]
uce-1891		XP_013787830.1	91.2781	transmembrane protein adipocyte-associated 1 homolog [Limulus polyphemus]
uce-1891		XP_015920217.1	92.0485	transmembrane protein adipocyte-associated 1-like isoform X1 [Parasteatoda tepidariorum]
uce-1891		KFM80418.1	93.5893	Transmembrane protein adipocyte-associated 1-like protein, partial [Stegodyphus mimosarum]
uce-1892	ctl	XP_022242258.1	98.9821	ubiquitin-conjugating enzyme E2 variant 2-like [Limulus polyphemus]
uce-1892		XP_022247320.1	100.138	ubiquitin-conjugating enzyme E2 variant 2-like isoform X1 [Limulus polyphemus]
uce-1892		XP_002435512.1	101.679	ubiquitin-conjugating enzyme, putative [Ixodes scapularis]
uce-1892		XP_022235527.1	103.219	ubiquitin-conjugating enzyme E2 variant 2-like isoform X1 [Limulus polyphemus]
uce-1892		XP_013783280.1	103.605	ubiquitin-conjugating enzyme E2 variant 2-like [Limulus polyphemus]
uce-1892		XP_013778587.2	104.76	ubiquitin-conjugating enzyme E2 variant 2-like isoform X1 [Limulus polyphemus]
uce-1892		KFM73663.1	105.531	Ubiquitin-conjugating enzyme E2 variant 2, partial [Stegodyphus mimosarum]
uce-1892		XP_015930548.1	105.531	ubiquitin-conjugating enzyme E2 variant 2 isoform X1 [Parasteatoda tepidariorum]
uce-1901	paralogs	XP_021001791.1	130.568	calcium uniporter protein, mitochondrial-like [Parasteatoda tepidariorum]
uce-1901		XP_015907693.1	130.183	calcium uniporter protein, mitochondrial [Parasteatoda tepidariorum]
uce-1901		XP_002412584.1	122.865	coiled-coil domain-containing protein 109A, putative [Ixodes scapularis]
uce-1901		XP_022240107.1	118.627	calcium uniporter protein, mitochondrial-like isoform X2 [Limulus polyphemus]
uce-1901		XP_013775041.1	114.39	calcium uniporter protein, mitochondrial-like [Limulus polyphemus]
uce-1901		XP_022239765.1	102.834	calcium uniporter protein, mitochondrial-like isoform X2 [Limulus polyphemus]
uce-1901		KFM80192.1	98.5969	Calcium uniporter protein, mitochondrial, partial [Stegodyphus mimosarum]
uce-1902	ctl	XP_022240114.1	145.591	Golgi-specific brefeldin A-resistance guanine nucleotide exchange factor 1-like isoform X1 [Limulus polyphemus]
uce-1902		XP_015907014.1	150.599	Golgi-specific brefeldin A-resistance guanine nucleotide exchange factor 1 isoform X1 [Parasteatoda tepidariorum]
uce-1902		KFM58105.1	153.295	Golgi-specific brefeldin A-resistance guanine nucleotide exchange factor 1, partial [Stegodyphus mimosarum]
uce-1919		XP_022240185.1	85.8853	E3 ubiquitin-protein ligase UBR5-like [Limulus polyphemus]
uce-1919		XP_002433418.1	91.6633	ubiquitin protein ligase edd, putative, partial [Ixodes scapularis]
uce-1919		KFM73984.1	93.9745	hypothetical protein X975_07965, partial [Stegodyphus mimosarum]
uce-1919		XP_015929428.1	95.9005	E3 ubiquitin-protein ligase UBR5 isoform X1 [Parasteatoda tepidariorum]
uce-1920	ctl	XP_002433418.1	155.992	ubiquitin protein ligase edd, putative, partial [Ixodes scapularis]
uce-1920		KFM73984.1	162.925	hypothetical protein X975_07965, partial [Stegodyphus mimosarum]
uce-1920		XP_015929469.1	166.392	E3 ubiquitin-protein ligase UBR5 isoform X7 [Parasteatoda tepidariorum]
uce-1920		XP_015929428.1	166.392	E3 ubiquitin-protein ligase UBR5 isoform X1 [Parasteatoda tepidariorum]
uce-1920		XP_022240185.1	167.933	E3 ubiquitin-protein ligase UBR5-like [Limulus polyphemus]
uce-1921		XP_002433418.1	68.5514	ubiquitin protein ligase edd, putative, partial [Ixodes scapularis]
uce-1921		XP_022240185.1	125.176	E3 ubiquitin-protein ligase UBR5-like [Limulus polyphemus]
uce-1921		XP_015929428.1	127.102	E3 ubiquitin-protein ligase UBR5 isoform X1 [Parasteatoda tepidariorum]
uce-1921		KFM73984.1	136.346	hypothetical protein X975_07965, partial [Stegodyphus mimosarum]
uce-1923	ctl	XP_013778077.1	71.633	alpha-actinin-like [Limulus polyphemus]
uce-1923	same @ 2010, 4027, 4175	KFM73660.1	77.411	Alpha-actinin, sarcomeric, partial [Stegodyphus mimosarum]
uce-1923		XP_015905765.1	77.411	alpha-actinin isoform X1 [Parasteatoda tepidariorum]
uce-1923		XP_022253656.1	77.7962	alpha-actinin-like, partial [Limulus polyphemus]
uce-1923		XP_022257753.1	79.337	alpha-actinin-like isoform X1 [Limulus polyphemus]
uce-1923		XP_002415333.1	80.8777	alpha-actinin, putative [Ixodes scapularis]
uce-1923		XP_013775721.1	168.703	spectrin alpha chain-like isoform X1 [Limulus polyphemus]
uce-1923		XP_002433506.1	171.4	spectrin alpha chain, putative [Ixodes scapularis]
uce-1923		XP_022239602.1	175.637	spectrin alpha chain-like [Limulus polyphemus]
uce-1923		XP_013791118.1	177.563	spectrin alpha chain, non-erythrocytic 1-like [Limulus polyphemus]
uce-1923		KFM64386.1	187.578	hypothetical protein X975_19997, partial [Stegodyphus mimosarum]
uce-1923		XP_021000807.1	187.578	spectrin alpha chain [Parasteatoda tepidariorum]
uce-1936	ctl	KFM56611.1	96.6709	Dynamin-1-like protein, partial [Stegodyphus mimosarum]
uce-1936		XP_015916258.1	98.9821	dynamin-1-like protein [Parasteatoda tepidariorum]
uce-1936		XP_002435740.1	103.219	dynamin, putative, partial [Ixodes scapularis]
uce-1960	ctl	KFM71442.1	82.4185	Protein still life, isoforms C/SIF type 2, partial [Stegodyphus mimosarum]
uce-1960		XP_015917223.1	82.4185	protein still life, isoform SIF type 1-like isoform X4 [Parasteatoda tepidariorum]
uce-1960		KFM57340.1	80.8777	Protein still life, isoforms C/SIF type 2, partial [Stegodyphus mimosarum]
uce-1960		XP_015930469.1	80.8777	protein still life, isoform SIF type 1 isoform X4 [Parasteatoda tepidariorum]
uce-1960		XP_022244027.1	79.7221	LOW QUALITY PROTEIN: protein still life, isoforms C/SIF type 2-like [Limulus polyphemus]
uce-1965	paralogs	KFM69496.1	55.4546	Coiled-coil domain-containing protein, partial [Stegodyphus mimosarum]
uce-1965		XP_021004082.1	56.9954	coiled-coil domain-containing protein AGAP005037 isoform X1 [Parasteatoda tepidariorum]
uce-1965		XP_022246287.1	44.669	coiled-coil domain-containing protein CG32809-like isoform X1 [Limulus polyphemus]
uce-1965		XP_002403458.1	34.2686	hypothetical protein IscW_ISCW021092 [Ixodes scapularis]
uce-1970		XP_002416642.1	71.2478	tetratricopeptide repeat protein, putative [Ixodes scapularis]
uce-1970		KFM78434.1	83.1889	Tetratricopeptide repeat protein 30A, partial [Stegodyphus mimosarum]
uce-1970		XP_015914325.1	83.1889	tetratricopeptide repeat protein 30A [Parasteatoda tepidariorum]
uce-1970		XP_013787939.1	85.1149	tetratricopeptide repeat protein 30A-like isoform X1 [Limulus polyphemus]
uce-1971	ctl	XP_002416642.1	64.6994	tetratricopeptide repeat protein, putative [Ixodes scapularis]
uce-1971		XP_015914325.1	88.5817	tetratricopeptide repeat protein 30A [Parasteatoda tepidariorum]
uce-1971		KFM78434.1	89.7373	Tetratricopeptide repeat protein 30A, partial [Stegodyphus mimosarum]
uce-1971		XP_013787939.1	93.2041	tetratricopeptide repeat protein 30A-like isoform X1 [Limulus polyphemus]
uce-1976	ctl	XP_002414128.1	100.138	GTP-binding protein DRG2, putative [Ixodes scapularis]
uce-1976		XP_013772625.1	102.834	GTP-binding protein 128up-like [Limulus polyphemus]
uce-1976		XP_015910673.1	103.219	developmentally-regulated GTP-binding protein 1 [Parasteatoda tepidariorum]
uce-1976		KFM71106.1	105.916	GTP-binding protein 128up, partial [Stegodyphus mimosarum]
uce-1990	ctl	KFM69767.1	219.164	SNF-related serine/threonine-protein kinase, partial [Stegodyphus mimosarum]
uce-1990		XP_015910517.1	218.394	serine/threonine-protein kinase MARK2 [Parasteatoda tepidariorum]
uce-1990		XP_022241365.1	208.379	hormonally up-regulated neu tumor-associated kinase-like [Limulus polyphemus]
uce-1990		XP_002413917.1	205.682	serine/threonine protein kinase, putative [Ixodes scapularis]
uce-1990		XP_013790034.2	202.601	SNF-related serine/threonine-protein kinase-like [Limulus polyphemus]
uce-1990		XP_022250355.1	112.464	MAP/microtubule affinity-regulating kinase 3-like isoform X3 [Limulus polyphemus]
uce-1990		XP_022250354.1	112.464	MAP/microtubule affinity-regulating kinase 3-like isoform X1 [Limulus polyphemus]
uce-1990		XP_013782358.1	112.464	MAP/microtubule affinity-regulating kinase 3-like isoform X2 [Limulus polyphemus]
uce-1990		KFM72440.1	111.694	MAP/microtubule affinity-regulating kinase 3, partial [Stegodyphus mimosarum]
uce-1990		XP_015905880.1	111.694	MAP/microtubule affinity-regulating kinase 3 isoform X2 [Parasteatoda tepidariorum]
uce-1990		XP_015905873.1	111.694	MAP/microtubule affinity-regulating kinase 3 isoform X1 [Parasteatoda tepidariorum]
uce-1990		XP_022242813.1	111.309	MAP/microtubule affinity-regulating kinase 3-like isoform X5 [Limulus polyphemus]
uce-1990		XP_022242812.1	111.309	MAP/microtubule affinity-regulating kinase 3-like isoform X4 [Limulus polyphemus]
uce-1990		XP_022242810.1	111.309	MAP/microtubule affinity-regulating kinase 3-like isoform X3 [Limulus polyphemus]
uce-1990		XP_022242809.1	111.309	MAP/microtubule affinity-regulating kinase 3-like isoform X2 [Limulus polyphemus]
uce-1990		XP_022242808.1	111.309	MAP/microtubule affinity-regulating kinase 3-like isoform X1 [Limulus polyphemus]
uce-1990		XP_022242807.1	111.309	MAP/microtubule affinity-regulating kinase 3-like isoform X1 [Limulus polyphemus]
uce-1990		XP_002415812.1	109.768	map/microtubule affinity-regulating kinase 2,4, putative [Ixodes scapularis]
uce-1990		XP_022253891.1	108.612	serine/threonine-protein kinase MARK1-like isoform X1 [Limulus polyphemus]
uce-1990		XP_013785563.1	108.612	serine/threonine-protein kinase MARK1-like isoform X2 [Limulus polyphemus]
uce-1990		XP_002410911.1	104.375	serine/threonine protein kinase, putative [Ixodes scapularis]
uce-1990		KFM77241.1	103.99	5'-AMP-activated protein kinase catalytic subunit alpha-2, partial [Stegodyphus mimosarum]
uce-1990		XP_015921251.1	103.99	5'-AMP-activated protein kinase catalytic subunit alpha-2-like [Parasteatoda tepidariorum]
uce-1990		XP_015921250.1	103.99	5'-AMP-activated protein kinase catalytic subunit alpha-2-like [Parasteatoda tepidariorum]
uce-1990		XP_015921248.1	103.99	5'-AMP-activated protein kinase catalytic subunit alpha-2-like [Parasteatoda tepidariorum]
uce-1990		XP_013788233.1	103.605	5'-AMP-activated protein kinase catalytic subunit alpha-2-like [Limulus polyphemus]
uce-1990		XP_013777026.2	102.449	5'-AMP-activated protein kinase catalytic subunit alpha-2-like [Limulus polyphemus]
uce-1990		XP_022249658.1	98.9821	serine/threonine-protein kinase SIK3-like isoform X1 [Limulus polyphemus]
uce-1990		XP_002414435.1	97.8265	serine/threonine protein kinase, putative, partial [Ixodes scapularis]
uce-1990		XP_022250689.1	96.2857	serine/threonine-protein kinase SIK3-like isoform X2 [Limulus polyphemus]
uce-1990		XP_022250688.1	96.2857	serine/threonine-protein kinase SIK3-like isoform X1 [Limulus polyphemus]
uce-1990		XP_013782665.2	96.2857	serine/threonine-protein kinase SIK3-like isoform X3 [Limulus polyphemus]
uce-1990		XP_015925670.1	95.5153	rho-associated protein kinase 2-like isoform X3 [Parasteatoda tepidariorum]
uce-1990		XP_015925669.1	95.5153	rho-associated protein kinase 2-like isoform X2 [Parasteatoda tepidariorum]
uce-1990		XP_015925668.1	95.5153	rho-associated protein kinase 2-like isoform X1 [Parasteatoda tepidariorum]
uce-1990		XP_022254623.1	95.1301	serine/threonine-protein kinase SIK3-like isoform X2 [Limulus polyphemus]
uce-1990		XP_022254622.1	95.1301	serine/threonine-protein kinase SIK3-like isoform X2 [Limulus polyphemus]
uce-1990		XP_013786308.1	95.1301	serine/threonine-protein kinase SIK3-like isoform X1 [Limulus polyphemus]
uce-1990		XP_020999847.1	93.9745	serine/threonine-protein kinase SIK3 [Parasteatoda tepidariorum]
uce-1990		XP_022251404.1	93.5893	5'-AMP-activated protein kinase catalytic subunit alpha-2-like [Limulus polyphemus]
uce-1990		XP_022249659.1	93.5893	serine/threonine-protein kinase SIK3-like isoform X2 [Limulus polyphemus]
uce-1990		XP_015911658.1	93.5893	serine/threonine-protein kinase BRSK2 isoform X2 [Parasteatoda tepidariorum]
uce-1990		XP_015911657.1	93.5893	serine/threonine-protein kinase BRSK2 isoform X1 [Parasteatoda tepidariorum]
uce-1990		XP_015923409.1	92.4337	serine/threonine-protein kinase BRSK2-like isoform X2 [Parasteatoda tepidariorum]
uce-1990		XP_015923408.1	92.4337	serine/threonine-protein kinase BRSK2-like isoform X1 [Parasteatoda tepidariorum]
uce-1990		XP_013793398.2	92.0485	serine/threonine-protein kinase SIK3-like, partial [Limulus polyphemus]
uce-1990		XP_021001755.1	92.0485	maternal embryonic leucine zipper kinase-like [Parasteatoda tepidariorum]
uce-1990		XP_022243434.1	91.6633	serine/threonine kinase SAD-1-like isoform X5 [Limulus polyphemus]
uce-1990		XP_022243433.1	91.6633	serine/threonine kinase SAD-1-like isoform X4 [Limulus polyphemus]
uce-1990		XP_022243432.1	91.6633	serine/threonine-protein kinase BRSK2-like isoform X3 [Limulus polyphemus]
uce-1990		XP_022243431.1	91.6633	serine/threonine-protein kinase BRSK2-like isoform X2 [Limulus polyphemus]
uce-1990		XP_022243430.1	91.6633	serine/threonine-protein kinase BRSK2-like isoform X1 [Limulus polyphemus]
uce-1990		XP_022248505.1	90.5077	serine/threonine-protein kinase SIK2-like isoform X2 [Limulus polyphemus]
uce-1990		XP_013780610.1	90.5077	serine/threonine-protein kinase SIK1-like isoform X1 [Limulus polyphemus]
uce-1990		XP_022236163.1	88.9669	serine/threonine-protein kinase BRSK2-like, partial [Limulus polyphemus]
uce-1990		XP_002404970.1	88.1965	serine/threonine protein kinase, putative [Ixodes scapularis]
uce-1990		XP_022254820.1	87.0409	uncharacterized protein LOC106470502, partial [Limulus polyphemus]
uce-1990		XP_013787277.2	86.6557	serine/threonine-protein kinase BRSK2-like isoform X1 [Limulus polyphemus]
uce-1990		XP_022251602.1	86.2705	probable serine/threonine-protein kinase HSL1, partial [Limulus polyphemus]
uce-1990		XP_022237898.1	86.2705	serine/threonine-protein kinase SIK2-like isoform X1 [Limulus polyphemus]
uce-1990		XP_013783629.1	85.8853	serine/threonine-protein kinase SIK2-like isoform X2 [Limulus polyphemus]
uce-1990		KFM82497.1	85.8853	Maternal embryonic leucine zipper kinase, partial [Stegodyphus mimosarum]
uce-1990		XP_021002117.1	85.8853	serine/threonine-protein kinase HSL1-like isoform X2 [Parasteatoda tepidariorum]
uce-1990		XP_021002116.1	85.8853	uncharacterized protein LOC107441821 isoform X1 [Parasteatoda tepidariorum]
uce-1990		XP_002435789.1	85.5001	maternal embryonic leucine zipper kinase, putative [Ixodes scapularis]
uce-1990		XP_022251077.1	85.1149	uncharacterized protein LOC106467233, partial [Limulus polyphemus]
uce-1990		XP_022246120.1	84.3445	maternal embryonic leucine zipper kinase-like, partial [Limulus polyphemus]
uce-1990		XP_002406901.1	82.4185	serine/threonine protein kinase, putative, partial [Ixodes scapularis]
uce-1990		KFM80600.1	82.4185	Cyclin-dependent kinase-like 1, partial [Stegodyphus mimosarum]
uce-1990		XP_022251703.1	82.0333	serine/threonine-protein kinase SIK2-like isoform X1 [Limulus polyphemus]
uce-1990		KFM70359.1	81.6481	PAS domain-containing serine/threonine-protein kinase, partial [Stegodyphus mimosarum]
uce-1990		XP_022240135.1	81.2629	cyclin-dependent kinase-like 1 isoform X3 [Limulus polyphemus]
uce-1990		XP_021001850.1	81.2629	cGMP-dependent protein kinase 1-like [Parasteatoda tepidariorum]
uce-1990		XP_022250176.1	80.8777	cGMP-dependent protein kinase, isozyme 2 forms cD4/T1/T3A/T3B-like isoform X1 [Limulus polyphemus]
uce-1990		XP_022237900.1	80.8777	serine/threonine-protein kinase SIK2-like isoform X2 [Limulus polyphemus]
uce-1990		XP_013782200.1	80.8777	cGMP-dependent protein kinase, isozyme 2 forms cD4/T1/T3A/T3B-like isoform X2 [Limulus polyphemus]
uce-1990		XP_022242517.1	80.4925	PAS domain-containing serine/threonine-protein kinase-like [Limulus polyphemus]
uce-1990		XP_022242516.1	80.4925	PAS domain-containing serine/threonine-protein kinase-like [Limulus polyphemus]
uce-1990		XP_021001802.1	80.1073	cGMP-dependent protein kinase 1-like [Parasteatoda tepidariorum]
uce-1990		XP_013777890.1	79.7221	testis-specific serine/threonine-protein kinase 1-like [Limulus polyphemus]
uce-1990		XP_015921947.1	79.7221	cyclin-dependent kinase-like 4 isoform X2 [Parasteatoda tepidariorum]
uce-1990		XP_015921946.1	79.7221	cyclin-dependent kinase-like 4 isoform X2 [Parasteatoda tepidariorum]
uce-1990		XP_015921945.1	79.7221	cyclin-dependent kinase-like 4 isoform X2 [Parasteatoda tepidariorum]
uce-1990		XP_015921944.1	79.7221	cyclin-dependent kinase-like 4 isoform X1 [Parasteatoda tepidariorum]
uce-1990		XP_022258120.1	79.337	cGMP-dependent protein kinase 1-like [Limulus polyphemus]
uce-1990		XP_022237901.1	78.9518	serine/threonine-protein kinase SIK2-like isoform X3 [Limulus polyphemus]
uce-1990		XP_022236826.1	78.9518	PAS domain-containing serine/threonine-protein kinase-like [Limulus polyphemus]
uce-1990		XP_021000960.1	78.1814	PAS domain-containing serine/threonine-protein kinase-like [Parasteatoda tepidariorum]
uce-1990		XP_022251998.1	77.411	cyclin-dependent kinase-like 1 isoform X3 [Limulus polyphemus]
uce-1998	ctl	XP_002400290.1	120.168	amyloid beta A4 precursor protein (APP)-binding protein, putative [Ixodes scapularis]
uce-1998		XP_022246540.1	121.324	uncharacterized protein LOC106463357 isoform X1 [Limulus polyphemus]
uce-1998		KFM73481.1	121.324	hypothetical protein X975_09242, partial [Stegodyphus mimosarum]
uce-1998		XP_015928594.1	121.324	uncharacterized protein LOC107455513 isoform X1 [Parasteatoda tepidariorum]
uce-2002	ctl	KFM62013.1	99.7525	NAD-dependent lysine demalonylase and desuccinylase sirtuin-5, mitochondrial, partial [Stegodyphus mimosarum]
uce-2002		XP_015907555.1	97.0561	NAD-dependent protein deacylase sirtuin-5, mitochondrial-like [Parasteatoda tepidariorum]
uce-2002		XP_022254666.1	96.2857	NAD-dependent protein deacylase sirtuin-5, mitochondrial-like [Limulus polyphemus]
uce-2002		XP_013788223.1	95.1301	NAD-dependent protein deacylase sirtuin-5, mitochondrial-like [Limulus polyphemus]
uce-2002		XP_002411743.1	93.9745	chromatin regulatory protein sir2, putative, partial [Ixodes scapularis]
uce-2004	ctl	XP_021001506.1	71.2478	E3 ubiquitin-protein ligase Nedd-4-like [Parasteatoda tepidariorum]
uce-2004		XP_022249557.1	71.633	E3 ubiquitin-protein ligase NEDD4-like isoform X1 [Limulus polyphemus]
uce-2004		KFM78518.1	72.0182	E3 ubiquitin-protein ligase Nedd-4, partial [Stegodyphus mimosarum]
uce-2004		XP_022255905.1	74.3294	E3 ubiquitin-protein ligase Su(dx)-like [Limulus polyphemus]
uce-2004		XP_022237721.1	74.3294	NEDD4-like E3 ubiquitin-protein ligase WWP1 [Limulus polyphemus]
uce-2004		XP_013794411.2	74.3294	NEDD4-like E3 ubiquitin-protein ligase WWP1 [Limulus polyphemus]
uce-2004		XP_002412402.1	76.6406	ubiquitin protein ligase, putative [Ixodes scapularis]
uce-2004		KFM65951.1	76.6406	E3 ubiquitin-protein ligase Su(dx), partial [Stegodyphus mimosarum]
uce-2004		XP_015912196.1	76.6406	E3 ubiquitin-protein ligase Su(dx)-like [Parasteatoda tepidariorum]
uce-2004		XP_013779767.1	77.411	NEDD4-like E3 ubiquitin-protein ligase WWP1 [Limulus polyphemus]
uce-2004		XP_022240927.1	78.1814	NEDD4-like E3 ubiquitin-protein ligase WWP1 isoform X1 [Limulus polyphemus]
uce-2004		XP_022254448.1	100.138	uncharacterized protein LOC106469402 [Limulus polyphemus]
uce-2004		XP_013786901.1	114.775	E3 ubiquitin-protein ligase HECW2-like [Limulus polyphemus]
uce-2004		XP_020999845.1	117.087	E3 ubiquitin-protein ligase HECW1 [Parasteatoda tepidariorum]
uce-2004		KFM72271.1	117.087	E3 ubiquitin-protein ligase HECW2, partial [Stegodyphus mimosarum]
uce-2004		XP_002406278.1	118.627	E3 ubiquitin ligase, putative, partial [Ixodes scapularis]
uce-2010	same @ 1923, 4027, 4175	XP_013775721.1	100.523	spectrin alpha chain-like isoform X1 [Limulus polyphemus]
uce-2010		XP_002433506.1	102.064	spectrin alpha chain, putative [Ixodes scapularis]
uce-2010		XP_013791118.1	103.219	spectrin alpha chain, non-erythrocytic 1-like [Limulus polyphemus]
uce-2010		XP_022239602.1	104.375	spectrin alpha chain-like [Limulus polyphemus]
uce-2010		KFM64386.1	117.087	hypothetical protein X975_19997, partial [Stegodyphus mimosarum]
uce-2010		XP_021000807.1	119.398	spectrin alpha chain [Parasteatoda tepidariorum]
uce-2028	ctl	XP_002409587.1	135.961	60S ribosomal protein L24, putative [Ixodes scapularis]
uce-2028		XP_013788121.1	138.272	60S ribosomal protein L24-like [Limulus polyphemus]
uce-2028		XP_015916372.1	141.354	60S ribosomal protein L24 [Parasteatoda tepidariorum]
uce-2028		KFM56591.1	142.895	60S ribosomal protein L24, partial [Stegodyphus mimosarum]
uce-2037	ctl	XP_015921052.1	95.5153	sarcosine dehydrogenase, mitochondrial-like [Parasteatoda tepidariorum]
uce-2037		XP_002407392.1	97.0561	sarcosine dehydrogenase, putative [Ixodes scapularis]
uce-2037		XP_013787690.1	99.3673	sarcosine dehydrogenase, mitochondrial-like [Limulus polyphemus]
uce-2037		KFM80467.1	103.605	Sarcosine dehydrogenase, mitochondrial, partial [Stegodyphus mimosarum]
uce-2054	paralogs	KFM58687.1	70.4774	Potassium voltage-gated channel subfamily KQT member 1, partial [Stegodyphus mimosarum]
uce-2054		XP_021003185.1	70.8626	potassium voltage-gated channel subfamily KQT member 1 [Parasteatoda tepidariorum]
uce-2054		XP_022245145.1	72.4034	potassium voltage-gated channel subfamily KQT member 1-like isoform X1 [Limulus polyphemus]
uce-2054		XP_015917707.1	73.559	potassium voltage-gated channel subfamily KQT member 1 isoform X1 [Parasteatoda tepidariorum]
uce-2054		XP_002408537.1	74.3294	voltage-gated channel, putative, partial [Ixodes scapularis]
uce-2058	ctl	KFM67401.1	247.284	putative isocitrate dehydrogenase [NAD] subunit beta, mitochondrial, partial [Stegodyphus mimosarum]
uce-2058		XP_015923176.1	244.202	probable isocitrate dehydrogenase [NAD] subunit beta, mitochondrial [Parasteatoda tepidariorum]
uce-2058		XP_013787934.1	232.646	isocitrate dehydrogenase [NAD] subunit beta, mitochondrial-like, partial [Limulus polyphemus]
uce-2058		XP_002434874.1	232.646	isocitrate dehydrogenase, putative [Ixodes scapularis]
uce-2058		KFM68325.1	176.792	Isocitrate dehydrogenase [NAD] subunit gamma 1, mitochondrial, partial [Stegodyphus mimosarum]
uce-2058		XP_015909429.1	172.94	isocitrate dehydrogenase [NAD] subunit gamma, mitochondrial [Parasteatoda tepidariorum]
uce-2058		XP_013788757.1	171.785	isocitrate dehydrogenase [NAD] subunit gamma, mitochondrial-like [Limulus polyphemus]
uce-2058		XP_002409478.1	166.777	isocitrate dehydrogenase, putative, partial [Ixodes scapularis]
uce-2058		XP_015920188.1	160.614	isocitrate dehydrogenase [NAD] subunit beta, mitochondrial-like [Parasteatoda tepidariorum]
uce-2058		XP_002435201.1	159.073	isocitrate dehydrogenase, putative, partial [Ixodes scapularis]
uce-2058		KFM66198.1	148.673	putative isocitrate dehydrogenase [NAD] subunit alpha, mitochondrial, partial [Stegodyphus mimosarum]
uce-2058		XP_015904046.1	144.821	probable isocitrate dehydrogenase [NAD] subunit alpha, mitochondrial [Parasteatoda tepidariorum]
uce-2058		XP_002403269.1	139.043	isocitrate dehydrogenase, putative, partial [Ixodes scapularis]
uce-2058		XP_002401648.1	102.064	isocitrate dehydrogenase, putative, partial [Ixodes scapularis]
uce-2058		XP_013792202.1	86.2705	isocitrate dehydrogenase [NAD] subunit alpha, mitochondrial-like, partial [Limulus polyphemus]
uce-2058		XP_002413526.1	65.4698	isocitrate dehydrogenase, putative, partial [Ixodes scapularis]
uce-2070	ctl	KFM65424.1	78.9518	hypothetical protein X975_05599, partial [Stegodyphus mimosarum]
uce-2070		XP_021004600.1	78.9518	diacylglycerol kinase 1-like [Parasteatoda tepidariorum]
uce-2070		XP_022240492.1	75.485	diacylglycerol kinase 1-like isoform X2 [Limulus polyphemus]
uce-2070		XP_022248289.1	75.0998	diacylglycerol kinase 1-like [Limulus polyphemus]
uce-2070		XP_002415416.1	67.3958	diacylglycerol kinase, putative, partial [Ixodes scapularis]
uce-2073	ctl	KFM62469.1	103.219	Integrator complex subunit 11, partial [Stegodyphus mimosarum]
uce-2073		XP_013787375.2	101.679	integrator complex subunit 11-like [Limulus polyphemus]
uce-2073		XP_015925728.1	100.908	integrator complex subunit 11 [Parasteatoda tepidariorum]
uce-2073		XP_002402434.1	97.4413	cleavage and polyadenylation specificity factor, putative [Ixodes scapularis]
uce-2079	same @ 3428	KFM78370.1	123.635	Neurofibromin, partial [Stegodyphus mimosarum]
uce-2079		XP_015909967.1	123.635	neurofibromin-like isoform X1 [Parasteatoda tepidariorum]
uce-2079		XP_022248395.1	125.946	neurofibromin-like, partial [Limulus polyphemus]
uce-2080		KFM78370.1	219.55	Neurofibromin, partial [Stegodyphus mimosarum]
uce-2080		XP_015909967.1	219.55	neurofibromin-like isoform X1 [Parasteatoda tepidariorum]
uce-2081	ctl	XP_002433719.1	119.783	pou domain transcription factor, putative [Ixodes scapularis]
uce-2081		XP_022246827.1	139.043	POU domain, class 6, transcription factor 1-like isoform X1 [Limulus polyphemus]
uce-2081		XP_022252278.1	144.05	POU domain, class 6, transcription factor 2-like isoform X1 [Limulus polyphemus]
uce-2081		XP_021003103.1	144.436	POU domain, class 6, transcription factor 1-like [Parasteatoda tepidariorum]
uce-2092	ctl	XP_013792933.1	109.768	xenotropic and polytropic retrovirus receptor 1 homolog, partial [Limulus polyphemus]
uce-2092		XP_002407245.1	109.768	xenotropic and polytropic murine leukemia virus receptor xpr1, putative, partial [Ixodes scapularis]
uce-2092		XP_013772395.1	110.153	xenotropic and polytropic retrovirus receptor 1-like [Limulus polyphemus]
uce-2092		XP_015906994.2	111.694	xenotropic and polytropic retrovirus receptor 1 homolog [Parasteatoda tepidariorum]
uce-2099	paralogs	KFM76549.1	66.2402	T-complex protein 1 subunit eta, partial [Stegodyphus mimosarum]
uce-2099		XP_022253945.1	65.0846	T-complex protein 1 subunit eta-like isoform X1 [Limulus polyphemus]
uce-2099		XP_013784954.1	65.0846	T-complex protein 1 subunit eta-like isoform X2 [Limulus polyphemus]
uce-2099		XP_015903775.1	65.0846	T-complex protein 1 subunit eta-like [Parasteatoda tepidariorum]
uce-2115	ctl	XP_002434627.1	131.724	hypothetical protein IscW_ISCW018676 [Ixodes scapularis]
uce-2115		XP_022241760.1	137.887	tubby-related protein 4-like [Limulus polyphemus]
uce-2115		XP_013785959.2	139.043	tubby-related protein 4-like, partial [Limulus polyphemus]
uce-2115		XP_015928826.1	145.206	tubby-related protein 4-like [Parasteatoda tepidariorum]
uce-2122	ctl	KFM77179.1	145.976	Proliferating cell nuclear antigen, partial [Stegodyphus mimosarum]
uce-2122		XP_013790832.1	142.895	proliferating cell nuclear antigen-like [Limulus polyphemus]
uce-2122		XP_021002956.1	141.354	proliferating cell nuclear antigen-like [Parasteatoda tepidariorum]
uce-2122		XP_002414350.1	140.969	DNA polymerase delta processivity factor, putative [Ixodes scapularis]
uce-2125	ctl	XP_015906953.1	103.99	serine/threonine-protein kinase mTOR [Parasteatoda tepidariorum]
uce-2125		KFM63533.1	105.145	hypothetical protein X975_19515, partial [Stegodyphus mimosarum]
uce-2125		XP_013784382.1	107.071	serine/threonine-protein kinase mTOR-like, partial [Limulus polyphemus]
uce-2126	ctl	XP_002433789.1	95.1301	alpha-mannosidase II, putative, partial [Ixodes scapularis]
uce-2126		XP_013780101.1	97.4413	alpha-mannosidase 2-like [Limulus polyphemus]
uce-2126		KFM79445.1	106.686	Alpha-mannosidase 2x, partial [Stegodyphus mimosarum]
uce-2126		XP_015928615.1	107.457	alpha-mannosidase 2 isoform X1 [Parasteatoda tepidariorum]
uce-2137	ctl	no annotation
uce-2138		KFM78494.1	98.9821	Golgi phosphoprotein 3, partial [Stegodyphus mimosarum]
uce-2138		XP_002414963.1	139.813	golgi protein, putative, partial [Ixodes scapularis]
uce-2138		XP_013790894.1	140.198	Golgi phosphoprotein 3 homolog sauron-like isoform X1 [Limulus polyphemus]
uce-2138		XP_013782551.1	141.354	Golgi phosphoprotein 3 homolog sauron-like [Limulus polyphemus]
uce-2138		XP_015917574.1	148.673	Golgi phosphoprotein 3 homolog sauron [Parasteatoda tepidariorum]
uce-2139	ctl	KFM78494.1	80.8777	Golgi phosphoprotein 3, partial [Stegodyphus mimosarum]
uce-2139		XP_002414963.1	169.859	golgi protein, putative, partial [Ixodes scapularis]
uce-2139		XP_013790894.1	179.104	Golgi phosphoprotein 3 homolog sauron-like isoform X1 [Limulus polyphemus]
uce-2139		XP_015917574.1	189.889	Golgi phosphoprotein 3 homolog sauron [Parasteatoda tepidariorum]
uce-2139		XP_013782551.1	192.971	Golgi phosphoprotein 3 homolog sauron-like [Limulus polyphemus]
uce-2148		XP_022256282.1	63.929	uncharacterized protein LOC106471968 isoform X1 [Limulus polyphemus]
uce-2148		XP_022235298.1	64.3142	uncharacterized protein LOC111083232, partial [Limulus polyphemus]
uce-2148		XP_022254676.1	67.0106	uncharacterized protein LOC106470363 [Limulus polyphemus]
uce-2148		XP_013787257.1	70.4774	uncharacterized protein LOC106471214 [Limulus polyphemus]
uce-2148		XP_022239639.1	71.2478	uncharacterized protein LOC111085430 [Limulus polyphemus]
uce-2148		XP_022252469.1	73.9442	uncharacterized protein LOC106468429 [Limulus polyphemus]
uce-2148		XP_022237495.1	73.9442	uncharacterized protein LOC111084986 [Limulus polyphemus]
uce-2148		XP_015911243.1	73.9442	uncharacterized protein LOC107442241 [Parasteatoda tepidariorum]
uce-2159	ctl	XP_013777216.1	112.464	histone-lysine N-methyltransferase EZH2-like [Limulus polyphemus]
uce-2159		XP_022245259.1	119.783	histone-lysine N-methyltransferase EZH2-like isoform X1 [Limulus polyphemus]
uce-2159		XP_002408953.1	124.02	enhancer of zeste, ezh, putative, partial [Ixodes scapularis]
uce-2159		XP_021000009.1	125.561	histone-lysine N-methyltransferase E(z)-like [Parasteatoda tepidariorum]
uce-2159		KFM67408.1	130.954	Histone-lysine N-methyltransferase EZH2, partial [Stegodyphus mimosarum]
uce-2185	ctl	XP_015904658.1	143.665	cytoplasmic dynein 1 heavy chain 1-like, partial [Parasteatoda tepidariorum]
uce-2185		XP_021002603.1	155.221	dynein heavy chain, cytoplasmic [Parasteatoda tepidariorum]
uce-2185		XP_002411858.1	155.606	cytoplasmic dynein heavy chain, putative, partial [Ixodes scapularis]
uce-2185		KFM80264.1	160.614	Dynein heavy chain, cytoplasmic, partial [Stegodyphus mimosarum]
uce-2185		XP_022254853.1	161.384	dynein heavy chain, cytoplasmic-like [Limulus polyphemus]
uce-2186		XP_002411858.1	102.064	cytoplasmic dynein heavy chain, putative, partial [Ixodes scapularis]
uce-2186		XP_022254853.1	107.842	dynein heavy chain, cytoplasmic-like [Limulus polyphemus]
uce-2186		XP_015904658.1	110.923	cytoplasmic dynein 1 heavy chain 1-like, partial [Parasteatoda tepidariorum]
uce-2186		XP_021002603.1	110.923	dynein heavy chain, cytoplasmic [Parasteatoda tepidariorum]
uce-2186		KFM80264.1	113.235	Dynein heavy chain, cytoplasmic, partial [Stegodyphus mimosarum]
uce-2187	ctl	XP_021002210.1	65.855	cytoplasmic dynein 2 heavy chain 1-like [Parasteatoda tepidariorum]
uce-2187		XP_002411858.1	104.76	cytoplasmic dynein heavy chain, putative, partial [Ixodes scapularis]
uce-2187		KFM80265.1	104.76	Dynein heavy chain, cytoplasmic, partial [Stegodyphus mimosarum]
uce-2187		XP_022254853.1	105.531	dynein heavy chain, cytoplasmic-like [Limulus polyphemus]
uce-2187		XP_021002603.1	105.916	dynein heavy chain, cytoplasmic [Parasteatoda tepidariorum]
uce-2191		XP_002411858.1	111.309	cytoplasmic dynein heavy chain, putative, partial [Ixodes scapularis]
uce-2191		KFM80265.1	134.806	Dynein heavy chain, cytoplasmic, partial [Stegodyphus mimosarum]
uce-2191		XP_022254853.1	135.191	dynein heavy chain, cytoplasmic-like [Limulus polyphemus]
uce-2191		XP_021002603.1	135.576	dynein heavy chain, cytoplasmic [Parasteatoda tepidariorum]
uce-2192		XP_022254853.1	125.176	dynein heavy chain, cytoplasmic-like [Limulus polyphemus]
uce-2192		XP_021002603.1	125.176	dynein heavy chain, cytoplasmic [Parasteatoda tepidariorum]
uce-2192		XP_002411858.1	125.561	cytoplasmic dynein heavy chain, putative, partial [Ixodes scapularis]
uce-2192		KFM80265.1	126.331	Dynein heavy chain, cytoplasmic, partial [Stegodyphus mimosarum]
uce-2193		KFM80265.1	117.087	Dynein heavy chain, cytoplasmic, partial [Stegodyphus mimosarum]
uce-2193		XP_021002603.1	118.627	dynein heavy chain, cytoplasmic [Parasteatoda tepidariorum]
uce-2193		XP_022254853.1	120.553	dynein heavy chain, cytoplasmic-like [Limulus polyphemus]
uce-2196		XP_021002603.1	115.546	dynein heavy chain, cytoplasmic [Parasteatoda tepidariorum]
uce-2196		XP_022254853.1	119.013	dynein heavy chain, cytoplasmic-like [Limulus polyphemus]
uce-2196		KFM80266.1	122.094	Dynein heavy chain, cytoplasmic, partial [Stegodyphus mimosarum]
uce-2208	same @ 4417	XP_013777630.1	98.9821	macoilin-1-like isoform X2 [Limulus polyphemus]
uce-2208		XP_013777629.1	98.9821	macoilin-like isoform X1 [Limulus polyphemus]
uce-2208		XP_021004185.1	100.523	macoilin-1-like [Parasteatoda tepidariorum]
uce-2208		KFM57033.1	102.449	Macoilin-1, partial [Stegodyphus mimosarum]
uce-2210		XP_002436267.1	78.1814	conserved hypothetical protein, partial [Ixodes scapularis]
uce-2210		XP_013785398.1	133.65	protein FAM46C-like [Limulus polyphemus]
uce-2210		XP_022246051.1	138.658	protein FAM46C-like isoform X1 [Limulus polyphemus]
uce-2210		KFM67492.1	146.362	Protein FAM46C, partial [Stegodyphus mimosarum]
uce-2210		XP_015903432.1	146.747	protein FAM46C-like isoform X1 [Parasteatoda tepidariorum]
uce-2216	paralogs	XP_022236658.1	81.6481	phosphatidate cytidylyltransferase, photoreceptor-specific-like [Limulus polyphemus]
uce-2216		XP_022242617.1	80.4925	phosphatidate cytidylyltransferase, photoreceptor-specific-like isoform X1 [Limulus polyphemus]
uce-2216		XP_015912788.1	78.5666	phosphatidate cytidylyltransferase, photoreceptor-specific-like isoform X1 [Parasteatoda tepidariorum]
uce-2216		XP_002414352.1	78.1814	CDP-diacylglycerol synthase, putative, partial [Ixodes scapularis]
uce-2219	ctl	XP_022237709.1	171.785	cleavage and polyadenylation specificity factor subunit 4-like [Limulus polyphemus]
uce-2219		XP_002412070.1	172.17	cleavage and polyadenylation specificity factor, putative [Ixodes scapularis]
uce-2219		XP_015928991.1	174.866	cleavage and polyadenylation specificity factor subunit 4 [Parasteatoda tepidariorum]
uce-2219		KFM74031.1	175.637	Cleavage and polyadenylation specificity factor subunit 4, partial [Stegodyphus mimosarum]
uce-2226	ctl	KFM56806.1	85.1149	Protein AF-10, partial [Stegodyphus mimosarum]
uce-2226		XP_002410800.1	86.6557	mixed-lineage leukemia protein, putative, partial [Ixodes scapularis]
uce-2226		XP_013794386.1	87.4261	protein AF-10-like isoform X1 [Limulus polyphemus]
uce-2227	paralogs	XP_002408504.1	72.4034	NADH-ubiquinone reductase, putative [Ixodes scapularis]
uce-2227		XP_022237693.1	110.923	NADH-ubiquinone oxidoreductase 75 kDa subunit, mitochondrial-like [Limulus polyphemus]
uce-2227		XP_015927820.1	114.775	NADH-ubiquinone oxidoreductase 75 kDa subunit, mitochondrial [Parasteatoda tepidariorum]
uce-2227		KFM81932.1	115.161	hypothetical protein X975_02652, partial [Stegodyphus mimosarum]
uce-2230	paralogs	XP_015929579.2	149.828	probable G-protein coupled receptor CG31760 [Parasteatoda tepidariorum]
uce-2230		KFM74544.1	147.517	putative G-protein coupled receptor, partial [Stegodyphus mimosarum]
uce-2230		XP_022237695.1	145.206	probable G-protein coupled receptor CG31760 [Limulus polyphemus]
uce-2230		XP_022239680.1	144.05	probable G-protein coupled receptor CG31760 isoform X2 [Limulus polyphemus]
uce-2230		XP_013794665.1	142.895	probable G-protein coupled receptor CG31760, partial [Limulus polyphemus]
uce-2230		XP_002405916.1	140.969	conserved hypothetical protein [Ixodes scapularis]
uce-2241	ctl	KFM64988.1	80.1073	XK-related protein 6, partial [Stegodyphus mimosarum]
uce-2241		XP_002413152.1	49.2914	conserved hypothetical protein [Ixodes scapularis]
uce-2241		XP_015909627.1	77.0258	uncharacterized protein LOC107441015 [Parasteatoda tepidariorum]
uce-2245	ctl	KFM71361.1	82.0333	Vacuolar protein sorting-associated protein 35, partial [Stegodyphus mimosarum]
uce-2245		XP_015919563.1	121.324	vacuolar protein sorting-associated protein 35 isoform X1 [Parasteatoda tepidariorum]
uce-2245		XP_002416036.1	121.709	vacuolar sorting protein, putative, partial [Ixodes scapularis]
uce-2245		XP_022256816.1	125.946	vacuolar protein sorting-associated protein 35-like isoform X1 [Limulus polyphemus]
uce-2250	paralogs	XP_002400927.1	151.369	N6-adenosine-methyltransferase 70 kDa subunit, putative [Ixodes scapularis]
uce-2250		XP_015929155.1	164.466	N6-adenosine-methyltransferase subunit METTL3-like [Parasteatoda tepidariorum]
uce-2250		XP_013776038.1	165.622	N6-adenosine-methyltransferase 70 kDa subunit-like [Limulus polyphemus]
uce-2250		KFM79549.1	171.014	N6-adenosine-methyltransferase subunit, partial [Stegodyphus mimosarum]
uce-2257	ctl	XP_013782479.1	105.916	glycine dehydrogenase (decarboxylating), mitochondrial-like isoform X1 [Limulus polyphemus]
uce-2257		XP_002436237.1	106.301	glycine dehydrogenase, putative, partial [Ixodes scapularis]
uce-2257		XP_021003868.1	117.857	glycine dehydrogenase (decarboxylating), mitochondrial-like, partial [Parasteatoda tepidariorum]
uce-2257		KFM76031.1	123.635	Glycine dehydrogenase [decarboxylating], mitochondrial, partial [Stegodyphus mimosarum]
uce-2261	ctl	XP_022243493.1	94.3597	rho GDP-dissociation inhibitor 1-like [Limulus polyphemus]
uce-2261		XP_022241937.1	95.5153	rho GDP-dissociation inhibitor 2-like [Limulus polyphemus]
uce-2261		XP_022257000.1	95.9005	rho GDP-dissociation inhibitor 2-like isoform X1 [Limulus polyphemus]
uce-2261		XP_002409713.1	99.3673	rho GDP dissociation inhibitor, putative, partial [Ixodes scapularis]
uce-2261		XP_015924790.1	113.62	rho GDP-dissociation inhibitor 2 [Parasteatoda tepidariorum]
uce-2262	ctl	XP_002399849.1	105.145	arp2/3, putative [Ixodes scapularis]
uce-2262		XP_015922590.1	114.775	actin-related protein 2/3 complex subunit 2-like isoform X1 [Parasteatoda tepidariorum]
uce-2262		XP_013789456.1	115.161	actin-related protein 2/3 complex subunit 2-like, partial [Limulus polyphemus]
uce-2262		KFM75143.1	116.316	putative actin-related protein 2/3 complex subunit 2, partial [Stegodyphus mimosarum]
uce-2280	ctl	KFM75954.1	65.0846	Coronin-6, partial [Stegodyphus mimosarum]
uce-2280		XP_013772588.1	80.4925	LOW QUALITY PROTEIN: coronin-6-like [Limulus polyphemus]
uce-2280		XP_013794715.1	88.9669	coronin-6-like [Limulus polyphemus]
uce-2280		XP_013777943.1	90.1225	coronin-1C-like [Limulus polyphemus]
uce-2280		XP_002408927.1	90.5077	Coronin-1C_i2 protein, putative [Ixodes scapularis]
uce-2280		XP_021003195.1	90.5077	coronin-6-like [Parasteatoda tepidariorum]
uce-2280		KFM70023.1	91.2781	Coronin-6, partial [Stegodyphus mimosarum]
uce-2280		XP_022254244.1	123.635	coronin-2B-like [Limulus polyphemus]
uce-2280		XP_002407052.1	134.806	Coronin, putative, partial [Ixodes scapularis]
uce-2280		XP_013783356.2	135.576	coronin-2B-like isoform X1 [Limulus polyphemus]
uce-2280		XP_015923530.1	139.428	coronin-2B-like [Parasteatoda tepidariorum]
uce-2280		XP_022256155.1	141.354	coronin-2B-like [Limulus polyphemus]
uce-2280		KFM79455.1	144.436	Coronin-2A, partial [Stegodyphus mimosarum]
uce-2281	ctl	XP_015916553.1	91.2781	sugar phosphate exchanger 3-like isoform X1 [Parasteatoda tepidariorum]
uce-2281		KFM60302.1	95.1301	Sugar phosphate exchanger 3, partial [Stegodyphus mimosarum]
uce-2281		XP_022251656.1	95.9005	sugar phosphate exchanger 3-like isoform X1 [Limulus polyphemus]
uce-2281		XP_013791109.2	98.9821	sugar phosphate exchanger 3-like, partial [Limulus polyphemus]
uce-2287	no annotation			no annotation
uce-2290	ctl	KFM75081.1	92.4337	NAD(P) transhydrogenase, mitochondrial, partial [Stegodyphus mimosarum]
uce-2290		XP_021002784.1	88.9669	NAD(P) transhydrogenase, mitochondrial-like [Parasteatoda tepidariorum]
uce-2290		XP_002409672.1	88.5817	NAD(P) transhydrogenase, putative [Ixodes scapularis]
uce-2290		XP_013771968.1	83.5741	NAD(P) transhydrogenase, mitochondrial-like [Limulus polyphemus]
uce-2296	ctl	XP_022240050.1	80.4925	plasma membrane calcium-transporting ATPase 2-like [Limulus polyphemus]
uce-2296		XP_013789247.1	105.916	plasma membrane calcium-transporting ATPase 1-like, partial [Limulus polyphemus]
uce-2296		XP_015903626.1	133.65	plasma membrane calcium-transporting ATPase 2 isoform X1 [Parasteatoda tepidariorum]
uce-2296		KFM74141.1	139.428	Plasma membrane calcium-transporting ATPase 3, partial [Stegodyphus mimosarum]
uce-2303	ctl	XP_022253037.1	68.1662	colorectal mutant cancer protein-like isoform X1 [Limulus polyphemus]
uce-2303		XP_015903715.1	77.0258	colorectal mutant cancer protein isoform X1 [Parasteatoda tepidariorum]
uce-2303		KFM80960.1	78.5666	Colorectal mutant cancer protein, partial [Stegodyphus mimosarum]
uce-2306	paralogs	KFM76517.1	153.68	PR domain zinc finger protein 1, partial [Stegodyphus mimosarum]
uce-2306		XP_021002994.1	142.895	PR domain zinc finger protein 1-like [Parasteatoda tepidariorum]
uce-2306		XP_015931061.1	141.354	PR domain zinc finger protein 1 [Parasteatoda tepidariorum]
uce-2306		XP_022249786.1	134.42	PR domain zinc finger protein 1-like [Limulus polyphemus]
uce-2306		XP_013782728.1	133.265	PR domain zinc finger protein 1-like, partial [Limulus polyphemus]
uce-2306		XP_013793257.1	119.783	zinc finger protein 235-like, partial [Limulus polyphemus]
uce-2306		XP_002414515.1	92.0485	hypothetical protein IscW_ISCW023811 [Ixodes scapularis]
uce-2306		XP_022248335.1	90.8929	PR domain zinc finger protein 2-like, partial [Limulus polyphemus]
uce-2306		XP_002413634.1	71.2478	zinc finger protein, putative [Ixodes scapularis]
uce-2306		XP_021002691.1	70.0922	zinc finger protein 845 [Parasteatoda tepidariorum]
uce-2306		XP_013785688.1	68.5514	zinc finger protein OZF-like [Limulus polyphemus]
uce-2306		XP_022254801.1	68.1662	zinc finger protein 227-like [Limulus polyphemus]
uce-2306		KFM66265.1	67.781	Zinc finger protein 227, partial [Stegodyphus mimosarum]
uce-2306		XP_015920200.1	67.781	zinc finger protein 84-like [Parasteatoda tepidariorum]
uce-2306		XP_022244224.1	67.3958	zinc finger protein 501-like [Limulus polyphemus]
uce-2306		XP_022244223.1	67.3958	zinc finger protein 501-like [Limulus polyphemus]
uce-2306		XP_022244222.1	67.3958	zinc finger protein 501-like [Limulus polyphemus]
uce-2306		XP_022244221.1	67.3958	zinc finger protein 501-like [Limulus polyphemus]
uce-2306		XP_022244220.1	67.3958	zinc finger protein 501-like [Limulus polyphemus]
uce-2306		XP_022244219.1	67.3958	zinc finger protein 501-like [Limulus polyphemus]
uce-2306		XP_022244217.1	67.3958	zinc finger protein 501-like [Limulus polyphemus]
uce-2306		XP_022244216.1	67.3958	zinc finger protein 501-like [Limulus polyphemus]
uce-2306		XP_013792171.1	67.3958	gastrula zinc finger protein xLCGF3.1-like [Limulus polyphemus]
uce-2306		XP_013786227.1	67.3958	zinc finger protein 2 homolog [Limulus polyphemus]
uce-2306		XP_013783686.2	67.3958	gastrula zinc finger protein xLCGF3.1-like [Limulus polyphemus]
uce-2306		XP_013776809.1	67.3958	zinc finger protein 501-like [Limulus polyphemus]
uce-2306		XP_013776808.1	67.3958	zinc finger protein 501-like [Limulus polyphemus]
uce-2306		XP_013776807.1	67.3958	zinc finger protein 501-like [Limulus polyphemus]
uce-2306		XP_013776806.1	67.3958	zinc finger protein 501-like [Limulus polyphemus]
uce-2306		KFM59500.1	67.3958	B-cell lymphoma 6 protein, partial [Stegodyphus mimosarum]
uce-2306		XP_021001607.1	67.3958	zinc finger protein 208-like, partial [Parasteatoda tepidariorum]
uce-2306		XP_022251765.1	67.0106	zinc finger protein 271-like isoform X4 [Limulus polyphemus]
uce-2306		XP_022251764.1	67.0106	zinc finger protein 271-like isoform X3 [Limulus polyphemus]
uce-2306		XP_022251763.1	67.0106	zinc finger protein 271-like isoform X3 [Limulus polyphemus]
uce-2306		XP_022251762.1	67.0106	zinc finger protein 271-like isoform X3 [Limulus polyphemus]
uce-2306		XP_022251761.1	67.0106	zinc finger protein 271-like isoform X2 [Limulus polyphemus]
uce-2306		XP_022251760.1	67.0106	zinc finger protein 271-like isoform X1 [Limulus polyphemus]
uce-2306		XP_022251759.1	67.0106	zinc finger protein 271-like isoform X1 [Limulus polyphemus]
uce-2306		XP_022251758.1	67.0106	zinc finger protein 271-like isoform X1 [Limulus polyphemus]
uce-2306		XP_022254076.1	66.6254	zinc finger protein 664-like [Limulus polyphemus]
uce-2306		KFM79331.1	66.6254	Zinc finger protein 268, partial [Stegodyphus mimosarum]
uce-2306		KFM74397.1	66.6254	Zinc finger protein 91, partial [Stegodyphus mimosarum]
uce-2306		KFM69154.1	66.6254	Zinc finger protein 271, partial [Stegodyphus mimosarum]
uce-2306		XP_021002435.1	66.6254	zinc finger protein 271-like [Parasteatoda tepidariorum]
uce-2306		XP_015926336.1	66.6254	zinc finger protein 2 homolog [Parasteatoda tepidariorum]
uce-2306		XP_015924378.1	66.6254	zinc finger protein 271-like [Parasteatoda tepidariorum]
uce-2306		XP_022251765.1	66.6254	zinc finger protein 271-like isoform X4 [Limulus polyphemus]
uce-2306		XP_022251764.1	66.6254	zinc finger protein 271-like isoform X3 [Limulus polyphemus]
uce-2306		XP_022251763.1	66.6254	zinc finger protein 271-like isoform X3 [Limulus polyphemus]
uce-2306		XP_022251762.1	66.6254	zinc finger protein 271-like isoform X3 [Limulus polyphemus]
uce-2306		XP_022251761.1	66.6254	zinc finger protein 271-like isoform X2 [Limulus polyphemus]
uce-2306		XP_022251760.1	66.6254	zinc finger protein 271-like isoform X1 [Limulus polyphemus]
uce-2306		XP_022251759.1	66.6254	zinc finger protein 271-like isoform X1 [Limulus polyphemus]
uce-2306		XP_022251758.1	66.6254	zinc finger protein 271-like isoform X1 [Limulus polyphemus]
uce-2306		XP_022253737.1	66.2402	gastrula zinc finger protein XlCGF26.1-like isoform X5 [Limulus polyphemus]
uce-2306		XP_022236987.1	66.2402	gastrula zinc finger protein xLCGF3.1-like, partial [Limulus polyphemus]
uce-2306		XP_013785447.2	66.2402	gastrula zinc finger protein XlCGF26.1-like isoform X6 [Limulus polyphemus]
uce-2306		KFM66268.1	66.2402	Zinc finger protein 28-like protein, partial [Stegodyphus mimosarum]
uce-2306		XP_022257477.1	65.855	zinc finger protein 501-like, partial [Limulus polyphemus]
uce-2306		XP_022256492.1	65.855	zinc finger protein 345-like isoform X2 [Limulus polyphemus]
uce-2306		XP_022256491.1	65.855	zinc finger protein 345-like isoform X1 [Limulus polyphemus]
uce-2306		XP_022256490.1	65.855	zinc finger protein 345-like isoform X1 [Limulus polyphemus]
uce-2306		XP_022256489.1	65.855	zinc finger protein 345-like isoform X1 [Limulus polyphemus]
uce-2306		XP_022253505.1	65.855	gastrula zinc finger protein xLCGF3.1-like isoform X1 [Limulus polyphemus]
uce-2306		XP_022253504.1	65.855	gastrula zinc finger protein xLCGF3.1-like isoform X1 [Limulus polyphemus]
uce-2306		XP_022244016.1	65.855	zinc finger protein 501-like isoform X4 [Limulus polyphemus]
uce-2306		XP_022244010.1	65.855	zinc finger protein 883-like isoform X1 [Limulus polyphemus]
uce-2306		XP_015928129.1	65.855	zinc finger protein 271-like [Parasteatoda tepidariorum]
uce-2306		XP_022258019.1	65.4698	zinc finger protein 345-like isoform X2 [Limulus polyphemus]
uce-2306		XP_022258018.1	65.4698	zinc finger protein 345-like isoform X2 [Limulus polyphemus]
uce-2306		XP_022256493.1	65.4698	zinc finger protein 660-like [Limulus polyphemus]
uce-2306		XP_022236219.1	65.4698	gastrula zinc finger protein xLCGF3.1-like [Limulus polyphemus]
uce-2306		XP_013790046.1	65.4698	zinc finger protein 345-like isoform X2 [Limulus polyphemus]
uce-2306		XP_013790045.1	65.4698	zinc finger protein 345-like isoform X1 [Limulus polyphemus]
uce-2306		KFM73973.1	65.4698	Zinc finger protein 271, partial [Stegodyphus mimosarum]
uce-2306		KFM60447.1	65.4698	Zinc finger protein 182, partial [Stegodyphus mimosarum]
uce-2306		XP_015922650.1	65.4698	zinc finger protein 708-like [Parasteatoda tepidariorum]
uce-2306		XP_015911820.1	65.4698	zinc finger protein 271 [Parasteatoda tepidariorum]
uce-2306		XP_022258001.1	65.0846	zinc finger protein 585A-like [Limulus polyphemus]
uce-2306		XP_022258000.1	65.0846	zinc finger protein 585A-like [Limulus polyphemus]
uce-2306		XP_022254921.1	65.0846	zinc finger protein 501-like [Limulus polyphemus]
uce-2306		XP_022251545.1	65.0846	zinc finger protein 62 homolog [Limulus polyphemus]
uce-2306		XP_022247814.1	65.0846	zinc finger protein 234-like [Limulus polyphemus]
uce-2308	ctl	XP_013787547.1	85.1149	14-3-3 protein zeta [Limulus polyphemus]
uce-2308		XP_022244986.1	83.9593	14-3-3 protein zeta-like isoform X2 [Limulus polyphemus]
uce-2308		XP_013783043.1	83.5741	14-3-3 protein zeta-like [Limulus polyphemus]
uce-2308		KFM75839.1	83.1889	14-3-3 protein zeta, partial [Stegodyphus mimosarum]
uce-2308		XP_002400423.1	82.4185	hypothetical protein IscW_ISCW014417 [Ixodes scapularis]
uce-2308		KFM56910.1	80.1073	14-3-3 protein zeta, partial [Stegodyphus mimosarum]
uce-2314	ctl	XP_013779192.1	120.168	pre-mRNA-processing factor 17-like [Limulus polyphemus]
uce-2314		XP_002402726.1	120.939	mRNA splicing factor, putative, partial [Ixodes scapularis]
uce-2314		KFM81335.1	125.176	Pre-mRNA-processing factor 17, partial [Stegodyphus mimosarum]
uce-2314		XP_021002099.1	125.176	pre-mRNA-processing factor 17-like [Parasteatoda tepidariorum]
uce-2325	ctl	XP_022242079.1	113.235	surfeit locus protein 4 homolog [Limulus polyphemus]
uce-2325		XP_013774471.1	113.62	surfeit locus protein 4 homolog isoform X1 [Limulus polyphemus]
uce-2325		XP_002405925.1	128.257	surfeit 4 protein, putative [Ixodes scapularis]
uce-2325		XP_013788265.1	137.117	surfeit locus protein 4 homolog isoform X1 [Limulus polyphemus]
uce-2325		XP_015925990.1	137.502	surfeit locus protein 4 homolog [Parasteatoda tepidariorum]
uce-2325		KFM64115.1	139.813	Surfeit locus protein 4-like protein, partial [Stegodyphus mimosarum]
uce-2337		KFM66933.1	176.792	Pre-mRNA-processing-splicing factor 8, partial [Stegodyphus mimosarum]
uce-2337		XP_015919108.1	177.948	pre-mRNA-processing-splicing factor 8 [Parasteatoda tepidariorum]
uce-2337		XP_002412787.1	179.104	pre-mRNA splicing factor Prp8, putative [Ixodes scapularis]
uce-2337		XP_013772616.1	180.259	pre-mRNA-processing-splicing factor 8 [Limulus polyphemus]
uce-2344		XP_013772616.1	114.005	pre-mRNA-processing-splicing factor 8 [Limulus polyphemus]
uce-2344		XP_002412787.1	114.005	pre-mRNA splicing factor Prp8, putative [Ixodes scapularis]
uce-2344		KFM66933.1	114.005	Pre-mRNA-processing-splicing factor 8, partial [Stegodyphus mimosarum]
uce-2344		XP_015919108.1	114.005	pre-mRNA-processing-splicing factor 8 [Parasteatoda tepidariorum]
uce-2347		XP_002412787.1	215.698	pre-mRNA splicing factor Prp8, putative [Ixodes scapularis]
uce-2347		XP_015919108.1	215.698	pre-mRNA-processing-splicing factor 8 [Parasteatoda tepidariorum]
uce-2347		KFM66933.1	216.853	Pre-mRNA-processing-splicing factor 8, partial [Stegodyphus mimosarum]
uce-2347		XP_013772616.1	221.09	pre-mRNA-processing-splicing factor 8 [Limulus polyphemus]
uce-2354	ctl	XP_013772616.1	147.517	pre-mRNA-processing-splicing factor 8 [Limulus polyphemus]
uce-2354		XP_002412787.1	148.673	pre-mRNA splicing factor Prp8, putative [Ixodes scapularis]
uce-2354		KFM66933.1	148.673	Pre-mRNA-processing-splicing factor 8, partial [Stegodyphus mimosarum]
uce-2354		XP_015919108.1	148.673	pre-mRNA-processing-splicing factor 8 [Parasteatoda tepidariorum]
uce-2355		XP_002412787.1	146.747	pre-mRNA splicing factor Prp8, putative [Ixodes scapularis]
uce-2355		XP_013772616.1	152.525	pre-mRNA-processing-splicing factor 8 [Limulus polyphemus]
uce-2355		XP_015919108.1	157.918	pre-mRNA-processing-splicing factor 8 [Parasteatoda tepidariorum]
uce-2355		KFM66933.1	158.688	Pre-mRNA-processing-splicing factor 8, partial [Stegodyphus mimosarum]
uce-2357		XP_002412787.1	122.479	pre-mRNA splicing factor Prp8, putative [Ixodes scapularis]
uce-2357		XP_015919108.1	124.405	pre-mRNA-processing-splicing factor 8 [Parasteatoda tepidariorum]
uce-2357		KFM66933.1	125.561	Pre-mRNA-processing-splicing factor 8, partial [Stegodyphus mimosarum]
uce-2357		XP_013772616.1	126.716	pre-mRNA-processing-splicing factor 8 [Limulus polyphemus]
uce-2372		XP_002399529.1	98.9821	tpr repeat nuclear phosphoprotein, putative [Ixodes scapularis]
uce-2372	excluded but should have include one of two	XP_020999997.1	101.293	RNA polymerase-associated protein CTR9 homolog [Parasteatoda tepidariorum]
uce-2372		XP_013778315.1	102.834	RNA polymerase-associated protein CTR9 homolog [Limulus polyphemus]
uce-2372		KFM58352.1	111.694	RNA polymerase-associated protein CTR9-like protein, partial [Stegodyphus mimosarum]
uce-2374		XP_013778315.1	92.0485	RNA polymerase-associated protein CTR9 homolog [Limulus polyphemus]
uce-2374		XP_002399529.1	94.3597	tpr repeat nuclear phosphoprotein, putative [Ixodes scapularis]
uce-2374		XP_020999997.1	97.4413	RNA polymerase-associated protein CTR9 homolog [Parasteatoda tepidariorum]
uce-2374		KFM58352.1	98.9821	RNA polymerase-associated protein CTR9-like protein, partial [Stegodyphus mimosarum]
uce-2393		XP_015928513.1	74.3294	E3 ubiquitin-protein ligase HUWE1 isoform X6 [Parasteatoda tepidariorum]
uce-2393		XP_022254448.1	74.7146	uncharacterized protein LOC106469402 [Limulus polyphemus]
uce-2393		KFM69569.1	75.485	E3 ubiquitin-protein ligase HUWE1, partial [Stegodyphus mimosarum]
uce-2393		XP_022249557.1	80.4925	E3 ubiquitin-protein ligase NEDD4-like isoform X1 [Limulus polyphemus]
uce-2393		XP_021001506.1	81.2629	E3 ubiquitin-protein ligase Nedd-4-like [Parasteatoda tepidariorum]
uce-2393		XP_002412402.1	81.6481	ubiquitin protein ligase, putative [Ixodes scapularis]
uce-2393		KFM78518.1	82.4185	E3 ubiquitin-protein ligase Nedd-4, partial [Stegodyphus mimosarum]
uce-2393		XP_022240927.1	131.339	NEDD4-like E3 ubiquitin-protein ligase WWP1 isoform X1 [Limulus polyphemus]
uce-2393		XP_022255905.1	140.969	E3 ubiquitin-protein ligase Su(dx)-like [Limulus polyphemus]
uce-2393		XP_022237721.1	141.739	NEDD4-like E3 ubiquitin-protein ligase WWP1 [Limulus polyphemus]
uce-2393		KFM65951.1	147.132	E3 ubiquitin-protein ligase Su(dx), partial [Stegodyphus mimosarum]
uce-2393		XP_015912196.1	147.132	E3 ubiquitin-protein ligase Su(dx)-like [Parasteatoda tepidariorum]
uce-2394		XP_022249557.1	75.0998	E3 ubiquitin-protein ligase NEDD4-like isoform X1 [Limulus polyphemus]
uce-2394		XP_022254448.1	78.1814	uncharacterized protein LOC106469402 [Limulus polyphemus]
uce-2394		XP_013786901.1	84.7297	E3 ubiquitin-protein ligase HECW2-like [Limulus polyphemus]
uce-2394		XP_002406278.1	84.7297	E3 ubiquitin ligase, putative, partial [Ixodes scapularis]
uce-2394		KFM72271.1	87.4261	E3 ubiquitin-protein ligase HECW2, partial [Stegodyphus mimosarum]
uce-2394		XP_020999845.1	88.5817	E3 ubiquitin-protein ligase HECW1 [Parasteatoda tepidariorum]
uce-2394		XP_022255905.1	120.553	E3 ubiquitin-protein ligase Su(dx)-like [Limulus polyphemus]
uce-2394		XP_022240927.1	121.709	NEDD4-like E3 ubiquitin-protein ligase WWP1 isoform X1 [Limulus polyphemus]
uce-2394		XP_013779767.1	122.865	NEDD4-like E3 ubiquitin-protein ligase WWP1 [Limulus polyphemus]
uce-2394		KFM65951.1	125.561	E3 ubiquitin-protein ligase Su(dx), partial [Stegodyphus mimosarum]
uce-2394	ctl	XP_015912196.1	125.561	E3 ubiquitin-protein ligase Su(dx)-like [Parasteatoda tepidariorum]
uce-2396	ctl	XP_015910355.1	119.783	negative elongation factor A [Parasteatoda tepidariorum]
uce-2396		XP_013790703.1	121.709	negative elongation factor A-like isoform X1 [Limulus polyphemus]
uce-2396		XP_002400446.1	121.709	negative elongation factor A, putative, partial [Ixodes scapularis]
uce-2403	paralogs	KFM74897.1	78.9518	Ras-related protein Rab-1A, partial [Stegodyphus mimosarum]
uce-2403		XP_013786664.1	76.2554	ras-related protein Rab-1A [Limulus polyphemus]
uce-2403		XP_002436250.1	77.411	GTP binding protein Rab-1A [Ixodes scapularis]
uce-2403		XP_021004031.1	81.2629	ras-related protein Rab-1A [Parasteatoda tepidariorum]
uce-2403		XP_013778822.1	80.4925	ras-related protein Rab-1A-like [Limulus polyphemus]
uce-2403		XP_013780952.1	79.7221	ras-related protein ORAB-1-like isoform X2 [Limulus polyphemus]
uce-2403		XP_013780951.1	79.7221	ras-related protein ORAB-1-like isoform X1 [Limulus polyphemus]
uce-2409	ctl	XP_022249785.1	100.138	protein lin-28 homolog [Limulus polyphemus]
uce-2409		XP_002414514.1	98.9821	cold shock domain-containing protein, putative [Ixodes scapularis]
uce-2409		KFM83491.1	98.5969	Protein lin-28-like protein, partial [Stegodyphus mimosarum]
uce-2409		XP_021003577.1	96.6709	protein lin-28 homolog isoform X2 [Parasteatoda tepidariorum]
uce-2409		XP_015917615.1	93.5893	protein lin-28 homolog [Parasteatoda tepidariorum]
uce-2409		XP_013781935.1	87.0409	protein lin-28 homolog, partial [Limulus polyphemus]
uce-2417	ctl	XP_002414264.1	64.6994	vacuolar assembly/sorting protein DID2, putative [Ixodes scapularis]
uce-2417		XP_022256798.1	70.4774	charged multivesicular body protein 1a-like [Limulus polyphemus]
uce-2417		XP_002415612.1	76.2554	vacuolar assembly/sorting protein DID2, putative, partial [Ixodes scapularis]
uce-2417		XP_021001100.1	87.4261	charged multivesicular body protein 1b-like [Parasteatoda tepidariorum]
uce-2417		XP_013789991.1	88.1965	charged multivesicular body protein 1b-like isoform X1 [Limulus polyphemus]
uce-2417		KFM61159.1	92.8189	Charged multivesicular body protein 1b, partial [Stegodyphus mimosarum]
uce-2423	ctl	XP_022240400.1	75.8702	GATA-binding factor 2-like isoform X1 [Limulus polyphemus]
uce-2423		XP_022242148.1	81.2629	endothelial transcription factor GATA-2-like isoform X3 [Limulus polyphemus]
uce-2423		XP_013774806.1	81.2629	GATA-binding factor 2-like isoform X1 [Limulus polyphemus]
uce-2423		XP_002434087.1	87.0409	endothelial transcription factor GATA-2, putative [Ixodes scapularis]
uce-2423		XP_021003354.1	109.768	endothelial transcription factor GATA-2-like isoform X1 [Parasteatoda tepidariorum]
uce-2423		NP_001310747.1	109.768	endothelial transcription factor GATA-2-like [Parasteatoda tepidariorum]
uce-2423		KFM60239.1	111.309	Endothelial transcription factor GATA-2, partial [Stegodyphus mimosarum]
uce-2426	ctl	XP_022251454.1	90.5077	WD repeat and FYVE domain-containing protein 3-like [Limulus polyphemus]
uce-2426		KFM56662.1	95.9005	WD repeat and FYVE domain-containing protein 3, partial [Stegodyphus mimosarum]
uce-2426		XP_021003748.1	96.2857	WD repeat and FYVE domain-containing protein 3 [Parasteatoda tepidariorum]
uce-2432	ctl	XP_022242138.1	78.1814	serine/threonine-protein kinase PRP4 homolog [Limulus polyphemus]
uce-2432		XP_002399646.1	75.8702	cyclin T-dependent kinase CDK9, putative [Ixodes scapularis]
uce-2432		KFM81362.1	74.7146	Serine/threonine-protein kinase PRP4-like protein, partial [Stegodyphus mimosarum]
uce-2432		XP_015910892.1	72.7886	serine/threonine-protein kinase PRP4 homolog [Parasteatoda tepidariorum]
uce-2445		XP_015920686.1	124.79	DNA-directed RNA polymerase II subunit RPB2 [Parasteatoda tepidariorum]
uce-2445		KFM76942.1	123.635	DNA-directed RNA polymerase II subunit RPB2, partial [Stegodyphus mimosarum]
uce-2445		XP_013773145.1	123.25	DNA-directed RNA polymerase II subunit RPB2 [Limulus polyphemus]
uce-2445		XP_002416483.1	122.094	DNA-directed RNA polymerase II, putative [Ixodes scapularis]
uce-2445		XP_002407492.1	74.3294	RNA polymerase III, putative, partial [Ixodes scapularis]
uce-2445		XP_022253565.1	73.9442	DNA-directed RNA polymerase III subunit RPC2-like [Limulus polyphemus]
uce-2445		XP_022253564.1	73.9442	DNA-directed RNA polymerase III subunit RPC2-like [Limulus polyphemus]
uce-2445		XP_013785303.1	73.9442	DNA-directed RNA polymerase III subunit RPC2-like [Limulus polyphemus]
uce-2445		KFM59556.1	72.4034	DNA-directed RNA polymerase III subunit RPC2, partial [Stegodyphus mimosarum]
uce-2445		XP_015905674.1	70.0922	DNA-directed RNA polymerase III subunit RPC2-like [Parasteatoda tepidariorum]
uce-2447		XP_013773145.1	88.1965	DNA-directed RNA polymerase II subunit RPB2 [Limulus polyphemus]
uce-2447		XP_002416483.1	92.0485	DNA-directed RNA polymerase II, putative [Ixodes scapularis]
uce-2447		KFM76942.1	93.2041	DNA-directed RNA polymerase II subunit RPB2, partial [Stegodyphus mimosarum]
uce-2447		XP_015920686.1	93.2041	DNA-directed RNA polymerase II subunit RPB2 [Parasteatoda tepidariorum]
uce-2450		XP_002416483.1	92.4337	DNA-directed RNA polymerase II, putative [Ixodes scapularis]
uce-2450		XP_013773145.1	97.0561	DNA-directed RNA polymerase II subunit RPB2 [Limulus polyphemus]
uce-2450		KFM76942.1	98.5969	DNA-directed RNA polymerase II subunit RPB2, partial [Stegodyphus mimosarum]
uce-2450		XP_015920686.1	98.5969	DNA-directed RNA polymerase II subunit RPB2 [Parasteatoda tepidariorum]
uce-2451	ctl	XP_013773145.1	116.316	DNA-directed RNA polymerase II subunit RPB2 [Limulus polyphemus]
uce-2451		XP_002416483.1	118.242	DNA-directed RNA polymerase II, putative [Ixodes scapularis]
uce-2451		KFM76942.1	123.25	DNA-directed RNA polymerase II subunit RPB2, partial [Stegodyphus mimosarum]
uce-2451		XP_015920686.1	123.25	DNA-directed RNA polymerase II subunit RPB2 [Parasteatoda tepidariorum]
uce-2464	ctl	XP_002408447.1	70.0922	conserved hypothetical protein, partial [Ixodes scapularis]
uce-2464		XP_015908120.2	81.6481	stomatin-like protein 2, mitochondrial [Parasteatoda tepidariorum]
uce-2464		XP_013777586.1	81.6481	stomatin-like protein 2, mitochondrial [Limulus polyphemus]
uce-2464		XP_002404399.1	82.0333	conserved hypothetical protein [Ixodes scapularis]
uce-2468	ctl	XP_002400475.1	114.775	vesicle docking protein P115, putative [Ixodes scapularis]
uce-2468		XP_015925812.1	114.39	general vesicular transport factor p115 [Parasteatoda tepidariorum]
uce-2468		XP_022246123.1	114.005	general vesicular transport factor p115-like isoform X3 [Limulus polyphemus]
uce-2480	same @ 1848	XP_002434448.1	95.1301	antiviral helicase Slh1, putative [Ixodes scapularis]
uce-2480		XP_022255650.1	95.5153	U5 small nuclear ribonucleoprotein 200 kDa helicase-like, partial [Limulus polyphemus]
uce-2480		KFM69174.1	102.064	U5 small nuclear ribonucleoprotein helicase, partial [Stegodyphus mimosarum]
uce-2480		XP_015924847.1	102.064	U5 small nuclear ribonucleoprotein 200 kDa helicase-like [Parasteatoda tepidariorum]
uce-2481	ctl	XP_002401687.1	119.398	propionyl-CoA carboxylase, putative, partial [Ixodes scapularis]
uce-2481		XP_013778374.1	126.331	propionyl-CoA carboxylase beta chain, mitochondrial-like, partial [Limulus polyphemus]
uce-2481		XP_015906713.1	128.257	propionyl-CoA carboxylase beta chain, mitochondrial-like [Parasteatoda tepidariorum]
uce-2481		KFM79259.1	128.642	Propionyl-CoA carboxylase beta chain, mitochondrial, partial [Stegodyphus mimosarum]
uce-2491	ctl	XP_015913883.1	68.5514	3-hydroxy-3-methylglutaryl-coenzyme A reductase [Parasteatoda tepidariorum]
uce-2491		KFM69136.1	69.3218	3-hydroxy-3-methylglutaryl-coenzyme A reductase, partial [Stegodyphus mimosarum]
uce-2491		XP_022249461.1	71.2478	3-hydroxy-3-methylglutaryl-coenzyme A reductase-like isoform X1 [Limulus polyphemus]
uce-2491		XP_002410562.1	73.559	hydroxymethylglutaryl-coA reductase, putative [Ixodes scapularis]
uce-2505	paralogs	KFM77426.1	216.468	2,3-bisphosphoglycerate-independent phosphoglycerate mutase, partial [Stegodyphus mimosarum]
uce-2505		XP_013774649.1	215.698	2,3-bisphosphoglycerate-independent phosphoglycerate mutase-like [Limulus polyphemus]
uce-2505		XP_013774379.1	214.542	2,3-bisphosphoglycerate-independent phosphoglycerate mutase-like [Limulus polyphemus]
uce-2505		XP_015913406.1	206.453	2,3-bisphosphoglycerate-independent phosphoglycerate mutase-like [Parasteatoda tepidariorum]
uce-2505		XP_015919560.1	189.889	2,3-bisphosphoglycerate-independent phosphoglycerate mutase-like [Parasteatoda tepidariorum]
uce-2505		XP_002408207.1	184.111	phosphoglycerate mutase, putative [Ixodes scapularis]
uce-2506	ctl	XP_002415968.1	110.538	conserved hypothetical protein, partial [Ixodes scapularis]
uce-2506		XP_013774671.1	112.079	TM2 domain-containing protein CG11103-like [Limulus polyphemus]
uce-2506		XP_015918102.1	112.464	TM2 domain-containing protein 2-like [Parasteatoda tepidariorum]
uce-2506		KFM83098.1	112.849	TM2 domain-containing protein, partial [Stegodyphus mimosarum]
uce-2514	ctl	XP_013780732.1	63.929	kelch-like protein 10 [Limulus polyphemus]
uce-2514		XP_015905137.1	65.0846	kelch-like protein 3 [Parasteatoda tepidariorum]
uce-2514		KFM82486.1	65.4698	Ring canal kelch-like protein, partial [Stegodyphus mimosarum]
uce-2514		XP_002435791.1	120.553	ring canal protein, putative, partial [Ixodes scapularis]
uce-2514		XP_013791196.1	135.576	kelch-like protein 2, partial [Limulus polyphemus]
uce-2522	ctl	XP_013785370.1	140.198	splicing factor 3B subunit 1 isoform X1 [Limulus polyphemus]
uce-2522		KFM77133.1	140.198	Splicing factor 3B subunit 1, partial [Stegodyphus mimosarum]
uce-2522		XP_015922847.1	140.198	splicing factor 3B subunit 1 isoform X1 [Parasteatoda tepidariorum]
uce-2522		XP_002406135.1	142.51	splicing factor 3B subunit, putative, partial [Ixodes scapularis]
uce-2524		XP_013785370.1	96.6709	splicing factor 3B subunit 1 isoform X1 [Limulus polyphemus]
uce-2524		XP_002406135.1	98.2117	splicing factor 3B subunit, putative, partial [Ixodes scapularis]
uce-2524		KFM77133.1	99.7525	Splicing factor 3B subunit 1, partial [Stegodyphus mimosarum]
uce-2524		XP_015922847.1	99.7525	splicing factor 3B subunit 1 isoform X1 [Parasteatoda tepidariorum]
uce-2525		XP_013785370.1	100.138	splicing factor 3B subunit 1 isoform X1 [Limulus polyphemus]
uce-2525		XP_002406135.1	100.138	splicing factor 3B subunit, putative, partial [Ixodes scapularis]
uce-2525		KFM77133.1	100.138	Splicing factor 3B subunit 1, partial [Stegodyphus mimosarum]
uce-2525		XP_015922847.1	100.138	splicing factor 3B subunit 1 isoform X1 [Parasteatoda tepidariorum]
uce-2526		XP_013785370.1	100.138	splicing factor 3B subunit 1 isoform X1 [Limulus polyphemus]
uce-2526		XP_002406135.1	101.293	splicing factor 3B subunit, putative, partial [Ixodes scapularis]
uce-2526		KFM77133.1	101.293	Splicing factor 3B subunit 1, partial [Stegodyphus mimosarum]
uce-2526		XP_015922847.1	101.293	splicing factor 3B subunit 1 isoform X1 [Parasteatoda tepidariorum]
uce-2528		XP_015922849.1	173.326	splicing factor 3B subunit 1 isoform X2 [Parasteatoda tepidariorum]
uce-2528		XP_015922847.1	173.326	splicing factor 3B subunit 1 isoform X1 [Parasteatoda tepidariorum]
uce-2528		KFM77133.1	170.629	Splicing factor 3B subunit 1, partial [Stegodyphus mimosarum]
uce-2528		XP_002406135.1	156.762	splicing factor 3B subunit, putative, partial [Ixodes scapularis]
uce-2528		XP_022253645.1	153.295	splicing factor 3B subunit 1 isoform X2 [Limulus polyphemus]
uce-2531		XP_013790076.1	86.2705	ubiquitin carboxyl-terminal hydrolase 7-like, partial [Limulus polyphemus]
uce-2531		XP_013784489.1	86.2705	ubiquitin carboxyl-terminal hydrolase 7-like [Limulus polyphemus]
uce-2531		XP_002404581.1	86.2705	ubiquitin carboxyl-terminal hydrolase, putative [Ixodes scapularis]
uce-2531		XP_015914055.1	86.2705	ubiquitin carboxyl-terminal hydrolase 7 isoform X1 [Parasteatoda tepidariorum]
uce-2531		KFM72468.1	88.5817	Ubiquitin carboxyl-terminal hydrolase 7, partial [Stegodyphus mimosarum]
uce-2532		KFM72468.1	68.5514	Ubiquitin carboxyl-terminal hydrolase 7, partial [Stegodyphus mimosarum]
uce-2532		XP_015914055.1	69.707	ubiquitin carboxyl-terminal hydrolase 7 isoform X1 [Parasteatoda tepidariorum]
uce-2533	ctl	XP_002404581.1	94.3597	ubiquitin carboxyl-terminal hydrolase, putative [Ixodes scapularis]
uce-2533		XP_015914055.1	98.5969	ubiquitin carboxyl-terminal hydrolase 7 isoform X1 [Parasteatoda tepidariorum]
uce-2533		KFM72468.1	103.99	Ubiquitin carboxyl-terminal hydrolase 7, partial [Stegodyphus mimosarum]
uce-2533		XP_013784489.1	104.375	ubiquitin carboxyl-terminal hydrolase 7-like [Limulus polyphemus]
uce-2559	ctl	KFM59731.1	83.5741	RING finger protein 113A, partial [Stegodyphus mimosarum]
uce-2559		XP_015919112.1	82.4185	RING finger protein 113A [Parasteatoda tepidariorum]
uce-2559		XP_013787655.1	80.4925	RING finger protein 113A-like isoform X2 [Limulus polyphemus]
uce-2586		XP_022239428.1	63.929	unconventional myosin-Ic-like [Limulus polyphemus]
uce-2586		XP_021002057.1	64.6994	unconventional myosin-XV-like [Parasteatoda tepidariorum]
uce-2586		KFM64721.1	65.855	Myosin-I heavy chain, partial [Stegodyphus mimosarum]
uce-2586		XP_002399377.1	115.931	myosin, putative [Ixodes scapularis]
uce-2586		XP_022246796.1	116.316	unconventional myosin-X-like, partial [Limulus polyphemus]
uce-2586		XP_022239098.1	120.168	unconventional myosin-X-like [Limulus polyphemus]
uce-2586		XP_021001594.1	135.191	myosin-I heavy chain [Parasteatoda tepidariorum]
uce-2593	ctl	XP_013784324.1	143.665	ER lumen protein-retaining receptor-like [Limulus polyphemus]
uce-2593		XP_013794090.1	144.821	ER lumen protein-retaining receptor 2-like [Limulus polyphemus]
uce-2593		XP_002413125.1	145.591	ER lumen protein retaining receptor, putative [Ixodes scapularis]
uce-2593		XP_013776479.1	150.599	ER lumen protein-retaining receptor 2-like [Limulus polyphemus]
uce-2593		KFM64850.1	155.606	ER lumen protein retaining receptor, partial [Stegodyphus mimosarum]
uce-2593		XP_015914318.1	158.688	ER lumen protein-retaining receptor [Parasteatoda tepidariorum]
uce-2595		KFM82593.1	131.339	Armadillo segment polarity protein, partial [Stegodyphus mimosarum]
uce-2595		XP_015914901.1	130.183	armadillo segment polarity protein-like isoform X2 [Parasteatoda tepidariorum]
uce-2595		XP_015914894.1	130.183	armadillo segment polarity protein-like isoform X1 [Parasteatoda tepidariorum]
[truncated: 2,397 more rows]
