# Supplementary material for: Phylogenomic analysis and revised classification of atypoid mygalomorph spiders (Araneae, Mygalomorphae), with notes on arachnid ultraconserved element loci
Source: PeerJ. 2019 May 3;7:e6864. doi: 10.7717/peerj.6864 (PMC6501763; doi:10.7717/peerj.6864)
Supplement: Table S3 — Sheet #1 includes summary of UCE loci for published arachnid datasets. Sheet #2 includes custom BLAST to Parasteotoda only. [file peerj-07-6864-s003.xlsx]

## Sheet: SharedUCEs
Derkarabetian et al 2018 Trav 50% matrix	Hedin et al 2018 Cicurina 50% published matrix	Hedin et al 2018 Hexathelid 50% published matrix	Atypoid 70% PHYLUCE matrix	Atypoid 70% PHYLUCE matrix	Parasteotoda Accession	BitScore	Hit (default = Parasteotoda)
		29	29	paralogs	XP_021001466.1	105.916	SH3 domain-containing RING finger protein 3 [Parasteatoda tepidariorum]
38			38	ctl	no annotation
44		44	44	ctl	XP_015926187.1	102.449	dihydrolipoyllysine-residue succinyltransferase component of 2-oxoglutarate dehydrogenase complex, mitochondrial [Parasteatoda tepidariorum]
	47	47	47	ctl	XP_021002015.1	107.071	small G protein signaling modulator 3 homolog [Parasteatoda tepidariorum]
			67	ctl	XP_015930612.1	68.5514	AP-2 complex subunit alpha-2-like [Parasteatoda tepidariorum]
	68	68		not in matrix; same as 67	XP_015930612.1	70.0922	AP-2 complex subunit alpha-2-like [Parasteatoda tepidariorum]
69		69		not in matrix; same as 67	XP_015930612.1	89.7373	AP-2 complex subunit alpha-2-like [Parasteatoda tepidariorum]
78	78		78	paralogs	XP_015920161.1	95.1301	voltage-dependent calcium channel type A subunit alpha-1 isoform X1 [Parasteatoda tepidariorum]
			81	paralogs	XP_015910896.1	124.79	E3 ubiquitin-protein ligase KCMF1 isoform X1 [Parasteatoda tepidariorum]
101	101	101	101	ctl	XP_021003518.1	108.997	NAD kinase [Parasteatoda tepidariorum]
116
127	127	127	127	ctl	XP_015907833.1	89.7373	SWI/SNF complex subunit SMARCC2-like isoform X1 [Parasteatoda tepidariorum]
128	128	128	128	ctl	XP_015925007.2	125.176	60S ribosomal protein L17, partial [Parasteatoda tepidariorum]
129
		131	131	ctl	XP_015919811.1	159.073	BTB/POZ domain-containing protein kctd15-like isoform X1 [Parasteatoda tepidariorum]
146
149			149	paralogs	XP_015928750.1	118.627	transmembrane protein 184B-like [Parasteatoda tepidariorum]
174	174	174	174	ctl	XP_015926722.2	65.855	CCR4-NOT transcription complex subunit 1-like [Parasteatoda tepidariorum]
	186	186	186	ctl	XP_022249518.1	107.457	filamin-A-like isoform X1 [Limulus polyphemus]
200		200	200	ctl	XP_015917383.1	85.1149	RING-box protein 2-like [Parasteatoda tepidariorum]
201		201	201	ctl	XP_015931113.1	134.42	catalase-like [Parasteatoda tepidariorum]
204	204		204	ctl	XP_021004247.1	106.686	coatomer subunit beta [Parasteatoda tepidariorum]
208
210	210	210	210	ctl	XP_015907390.1	99.3673	chloride intracellular channel exc-4 [Parasteatoda tepidariorum]
212	212		212	ctl	no annotation
217	217	217	217	ctl	XP_015920292.1	153.295	methionine aminopeptidase 2-like [Parasteatoda tepidariorum]
221	221	221	221	ctl	XP_015917274.1	105.916	son of sevenless homolog 2-like isoform X1 [Parasteatoda tepidariorum]
	222	222	222	same @ 221	XP_015917274.1	120.168	son of sevenless homolog 2-like isoform X1 [Parasteatoda tepidariorum]
229	229	229	229	ctl	XP_015913825.1	115.931	protein unc-13 homolog B-like [Parasteatoda tepidariorum]
231	231	231	231	ctl	XP_021003319.1	88.9669	cell division cycle and apoptosis regulator protein 1, partial [Parasteatoda tepidariorum]
		233			XP_015906102.1	73.1738	integrator complex subunit 3-like [Parasteatoda tepidariorum]
235	235		235	ctl	XP_015919071.1	132.109	N-acyl-phosphatidylethanolamine-hydrolyzing phospholipase D [Parasteatoda tepidariorum]
251	251	251	251	ctl	XP_015918259.1	88.9669	cullin-1 isoform X1 [Parasteatoda tepidariorum]
252
266	266	266	266	ctl	XP_021002221.1	135.576	E3 ubiquitin-protein ligase HERC2 [Parasteatoda tepidariorum]
276	276	276	276	ctl	XP_021004062.1	100.138	malignant T-cell-amplified sequence 1 [Parasteatoda tepidariorum]
	279		279	paralogs	XP_015927082.1	112.464	sodium channel protein para-like [Parasteatoda tepidariorum]
283	283	283	283	ctl	XP_015910230.1	107.457	SWI/SNF-related matrix-associated actin-dependent regulator of chromatin subfamily B member 1-A-like isoform X2 [Parasteatoda tepidariorum]
296			296	paralogs	XP_021000639.1	178.718	NACHT and WD repeat domain-containing protein 2 [Parasteatoda tepidariorum]
297
314		302	302	ctl	XP_015926308.1	164.851	uncharacterized protein LOC107453849 [Parasteatoda tepidariorum]
	314	314	314	ctl	XP_015926793.1	147.517	pumilio homolog 2 isoform X1 [Parasteatoda tepidariorum]
315	315		315	same @ 314	XP_015926793.1	98.9821	pumilio homolog 2 isoform X1 [Parasteatoda tepidariorum]
		330	330	ctl	XP_015908739.1	66.2402	YEATS domain-containing protein 4-like [Parasteatoda tepidariorum]
333
		334	334	ctl	XP_015910862.1	121.324	cleft lip and palate transmembrane protein 1 homolog [Parasteatoda tepidariorum]
335	335	335	335	ctl	XP_015905360.1	108.997	pleiotropic regulator 1-like [Parasteatoda tepidariorum]
342
		343	343	ctl	XP_021004059.1	115.161	probable ubiquitin carboxyl-terminal hydrolase FAF-X [Parasteatoda tepidariorum]
353	353		353	ctl	XP_015924999.1	114.005	calcium-binding mitochondrial carrier protein SCaMC-2 [Parasteatoda tepidariorum]
360			360	ctl	XP_015925023.2	96.6709	ubiquitin carboxyl-terminal hydrolase 47 isoform X2 [Parasteatoda tepidariorum]
	361		361	paralogs	XP_015918000.1	159.458	ATP-dependent RNA helicase DDX3Y isoform X2 [Parasteatoda tepidariorum]
			364	paralogs	XP_015907590.1	107.457	CTP synthase 1 isoform X3 [Parasteatoda tepidariorum]
368	368	368	368	same @ 369	XP_015929320.1	158.303	probable ATP-dependent RNA helicase DDX46 isoform X1 [Parasteatoda tepidariorum]
369	369	369	369	ctl	XP_015929320.1	98.5969	probable ATP-dependent RNA helicase DDX46 isoform X1 [Parasteatoda tepidariorum]
370			370	ctl	XP_015910135.1	106.301	glycogen synthase kinase-3 beta [Parasteatoda tepidariorum]
378	378
		382	382	same @ 383	XP_015909114.1	165.622	E3 ubiquitin-protein ligase MYCBP2 [Parasteatoda tepidariorum]
383	383	383	383	ctl	XP_015909114.1	114.39	E3 ubiquitin-protein ligase MYCBP2 [Parasteatoda tepidariorum]
384			384	same @ 383	XP_015909114.1	95.1301	E3 ubiquitin-protein ligase MYCBP2 [Parasteatoda tepidariorum]
		394	394	ctl	XP_021000601.1	83.5741	signal-induced proliferation-associated 1-like protein 1 [Parasteatoda tepidariorum]
			422	ctl	XP_015913768.2	137.502	phosphoenolpyruvate carboxykinase, cytosolic [GTP]-like [Parasteatoda tepidariorum]
437		437	437	ctl	XP_015922423.1	117.857	uracil phosphoribosyltransferase homolog [Parasteatoda tepidariorum]
443
449	449	449	449	same @ 450	XP_015916319.1	89.7373	eukaryotic translation initiation factor 1 [Parasteatoda tepidariorum]
450	450	450	450	ctl	XP_015916319.1	95.5153	eukaryotic translation initiation factor 1 [Parasteatoda tepidariorum]
451
459	459	459	459	ctl	XP_021004591.1	121.324	formin-like protein CG32138 [Parasteatoda tepidariorum]
463			463	paralogs	XP_015910069.1	175.252	brain tumor protein-like [Parasteatoda tepidariorum]
471		471	471	same @ 472	XP_015926421.1	113.235	brefeldin A-inhibited guanine nucleotide-exchange protein 2 [Parasteatoda tepidariorum]
472	472	472	472	ctl	XP_015926421.1	105.531	brefeldin A-inhibited guanine nucleotide-exchange protein 2 [Parasteatoda tepidariorum]
		477	477	ctl	XP_015922609.1	83.5741	cAMP-dependent protein kinase regulatory subunit isoform X1 [Parasteatoda tepidariorum]
482			482	ctl	XP_021002880.1	98.2117	uncharacterized protein LOC107440639 [Parasteatoda tepidariorum]
	484	484	484	ctl	XP_015912142.1	66.6254	E3 ubiquitin-protein ligase RNF19B isoform X1 [Parasteatoda tepidariorum]
492		492	492	ctl	XP_021003691.1	137.887	ryanodine receptor [Parasteatoda tepidariorum]
		497			KFM73890.1	131.724	hypothetical protein X975_01874, partial [Stegodyphus mimosarum]
503	503	503	503	ctl	XP_015927341.1	68.9366	cactin [Parasteatoda tepidariorum]
517	517	517	517	ctl	XP_021000792.1	89.3521	eukaryotic translation initiation factor 3 subunit D [Parasteatoda tepidariorum]
527		527	527	ctl	XP_015917281.1	103.219	RNA-binding protein 42 isoform X1 [Parasteatoda tepidariorum]
538	538	538	538	same as 3644	XP_015905153.1	103.605	YTH domain-containing family protein 3-like [Parasteatoda tepidariorum]
541		541	541	ctl	XP_015905005.1	103.605	4-hydroxyphenylpyruvate dioxygenase [Parasteatoda tepidariorum]
549			549	paralogs	XP_021001073.1	96.6709	regulating synaptic membrane exocytosis protein 1-like isoform X1 [Parasteatoda tepidariorum]
559		559	559	paralogs	XP_021002627.1	125.561	DNA-directed RNA polymerase I subunit RPA1-like [Parasteatoda tepidariorum]
563
		573	573	ctl	XP_015928118.1	184.496	DNA topoisomerase 2-alpha [Parasteatoda tepidariorum]
584
585
590	590	590	590	same as 2938	XP_015927848.1	127.872	myosin-VIIa isoform X1 [Parasteatoda tepidariorum]
594	594		594	paralogs	XP_015919278.1	136.732	AP-1 complex subunit gamma-1 [Parasteatoda tepidariorum]
595	595		595	paralogs	XP_021002343.1	120.939	spectrin beta chain [Parasteatoda tepidariorum]
597	597	597	597	paralogs, same @ 595	XP_021002343.1	113.235	spectrin beta chain [Parasteatoda tepidariorum]
607
612			612	paralogs	XP_021001249.1	115.161	WD repeat-containing protein 47-like [Parasteatoda tepidariorum]
			628	ctl	XP_015922668.1	92.8189	ATP synthase subunit alpha, mitochondrial isoform X1 [Parasteatoda tepidariorum]
629	629	629	629	ctl	XP_015925068.1	72.0182	leucine-rich repeat serine/threonine-protein kinase 1 isoform X1 [Parasteatoda tepidariorum]
630
631	631
641			641	ctl	XP_015903565.1	147.902	protein BCL9 homolog [Parasteatoda tepidariorum]
	663
666	666		666	ctl	XP_015918534.1	83.9593	60S ribosomal protein L23 [Parasteatoda tepidariorum]
681		641	681	paralogs	XP_015907174.1	64.3142	uncharacterized protein LOC107439184 isoform X1 [Parasteatoda tepidariorum]
682		682	682	same @ 687	XP_021003106.1	76.2554	transformation/transcription domain-associated protein [Parasteatoda tepidariorum]
683
685
			686	same @ 687	XP_021003106.1	90.1225	transformation/transcription domain-associated protein [Parasteatoda tepidariorum]
687		687	687	ctl	XP_021003106.1	110.153	transformation/transcription domain-associated protein [Parasteatoda tepidariorum]
689			689	same @ 687	XP_021003106.1	111.694	transformation/transcription domain-associated protein [Parasteatoda tepidariorum]
694			694	ctl	XP_015930503.1	110.153	luc7-like protein 3 [Parasteatoda tepidariorum]
711
	730
744	747	747	747	ctl	XP_015910563.1	177.563	S-phase kinase-associated protein 1 [Parasteatoda tepidariorum]
747
750	750	750	750	ctl	XP_015919058.1	124.405	striatin-3 isoform X1 [Parasteatoda tepidariorum]
752		752	752	ctl	XP_015911082.1	82.8037	GTP cyclohydrolase 1 isoform X1 [Parasteatoda tepidariorum]
			753	paralogs	XP_015919889.1	229.18	AP-2 complex subunit mu [Parasteatoda tepidariorum]
		757	757	ctl	XP_015930029.2	79.7221	dedicator of cytokinesis protein 7-like [Parasteatoda tepidariorum]
761			761	paralogs	XP_015909634.1	84.3445	muscarinic acetylcholine receptor DM1-like [Parasteatoda tepidariorum]
	763	763	763	ctl	XP_015913713.1	82.0333	40S ribosomal protein S5 [Parasteatoda tepidariorum]
772		772	772	ctl	XP_015917471.1	107.457	E3 ubiquitin-protein ligase UBR3 isoform X1 [Parasteatoda tepidariorum]
774	774		774	ctl	XP_015909199.1	83.1889	T-complex protein 1 subunit zeta [Parasteatoda tepidariorum]
778		778	778	ctl	KFM73788.1	95.1301	Anaphase-promoting complex subunit 11, partial [Stegodyphus mimosarum]
			791	same @ 792	XP_015920095.1	97.0561	acetyl-CoA carboxylase isoform X8 [Parasteatoda tepidariorum]
792	792	792	792	ctl	XP_015920086.1	181.8	acetyl-CoA carboxylase isoform X1 [Parasteatoda tepidariorum]
			793	ctl	XP_015917970.1	91.6633	RNA-binding protein Nova-1-like [Parasteatoda tepidariorum]
794	794	794	794	ctl	XP_021001432.1	98.5969	guanine nucleotide-binding protein G(I)/G(S)/G(T) subunit beta-1 [Parasteatoda tepidariorum]
839			839	ctl	XP_015903637.1	134.42	plasma membrane calcium-transporting ATPase 1 isoform X7 [Parasteatoda tepidariorum]
		840			XP_015917396.1	144.436	nipped-B-like protein [Parasteatoda tepidariorum]
		854	854	ctl	XP_015924419.1	142.124	WD repeat-containing protein 7 [Parasteatoda tepidariorum]
856		856	856	ctl	XP_015913707.1	130.954	pyruvate carboxylase, mitochondrial [Parasteatoda tepidariorum]
		857	857	same @ 856	XP_015913707.1	119.013	pyruvate carboxylase, mitochondrial [Parasteatoda tepidariorum]
		875	875	ctl	KFM64798.1	100.908	putative E3 ubiquitin-protein ligase TRIP12, partial [Stegodyphus mimosarum]
884
887	887	887	887	ctl	XP_015913965.1	125.176	nuclear export mediator factor NEMF-like [Parasteatoda tepidariorum]
890	890	890	890	ctl	XP_015914685.1	81.6481	glycogen debranching enzyme [Parasteatoda tepidariorum]
	892
		894			XP_015908854.1	87.0409	histone acetyltransferase KAT5 [Parasteatoda tepidariorum]
		897			XP_015913001.1	118.242	tetratricopeptide repeat protein 8-like [Parasteatoda tepidariorum]
916	916		916	paralogs	XP_015931104.1	94.3597	inhibitor of growth protein 4-like [Parasteatoda tepidariorum]
926			926	ctl	XP_015904146.1	122.479	cGMP-inhibited 3',5'-cyclic phosphodiesterase A-like isoform X1 [Parasteatoda tepidariorum]
939	939	939	939	ctl	XP_021000242.1	92.4337	enhancer of polycomb homolog 1-like [Parasteatoda tepidariorum]
			945	same @ 3834	XP_015903448.1	125.561	eukaryotic peptide chain release factor subunit 1 [Parasteatoda tepidariorum]
953		953	953	paralogs	XP_015914975.1	79.7221	glucose-6-phosphatase-like [Parasteatoda tepidariorum]
971	971		971	ctl	XP_015920065.1	120.939	alpha-mannosidase 2C1 [Parasteatoda tepidariorum]
		980	980	ctl	XP_015921954.1	111.309	general receptor for phosphoinositides 1-associated scaffold protein-like isoform X1 [Parasteatoda tepidariorum]
986		986	986	ctl	XP_015921599.1	76.6406	tRNA-dihydrouridine(47) synthase [NAD(P)(+)]-like [Parasteatoda tepidariorum]
		1012	1012	ctl	XP_015917764.1	150.984	fizzy-related protein homolog [Parasteatoda tepidariorum]
1018	1018	1018	1018	ctl	XP_021002081.1	125.946	zinc finger protein 672 [Parasteatoda tepidariorum]
1019	1019		1019	paralogs	XP_015910892.1	65.0846	serine/threonine-protein kinase PRP4 homolog [Parasteatoda tepidariorum]
1040
			1048	ctl	XP_021004649.1	28.1054	elongation factor G, mitochondrial-like [Parasteatoda tepidariorum]
		1055	1055	ctl	XP_015910558.1	80.4925	importin subunit beta-1-like [Parasteatoda tepidariorum]
1061		1061	1061	ctl	XP_015914861.1	125.946	signal recognition particle receptor subunit alpha isoform X1 [Parasteatoda tepidariorum]
1084
1091	1091	1091	1091	ctl	XP_015917437.1	105.916	lysine--tRNA ligase [Parasteatoda tepidariorum]
1099		1099	1099	paralogs; same @ 1100	XP_015929578.1	106.686	moesin/ezrin/radixin homolog 1 [Parasteatoda tepidariorum]
	1100	1100	1100	ctl	XP_015929578.1	108.997	moesin/ezrin/radixin homolog 1 [Parasteatoda tepidariorum]
	1107
		1108	1108	ctl	XP_015915059.1	260.381	WD repeat-containing protein 20 [Parasteatoda tepidariorum]
1100
1121	1121	1121	1121	ctl	XP_015903142.1	174.481	eukaryotic translation initiation factor 4 gamma 2-like [Parasteatoda tepidariorum]
1133	1133	1133	1133	ctl	XP_015922325.1	83.5741	mitogen-activated protein kinase kinase kinase 7 [Parasteatoda tepidariorum]
1136	1136
1137			1137	ctl	XP_015910060.1	25.7942	26S proteasome non-ATPase regulatory subunit 14 [Parasteatoda tepidariorum]
1150			1150	ctl	XP_021001121.1	100.523	tubulin gamma-1 chain [Parasteatoda tepidariorum]
1165
1180	1180		1180	paralogs	XP_015912570.1	81.6481	RING finger and SPRY domain-containing protein 1-like [Parasteatoda tepidariorum]
1182	1182		1182	ctl	XP_015923984.1	137.117	protein SET [Parasteatoda tepidariorum]
1188
1189
		1195		not in matrix; same @ 1197, 4084	XP_015908140.1	92.0485	inositol 1,4,5-trisphosphate receptor [Parasteatoda tepidariorum]
1197		1197	1197	ctl	XP_015908140.1	112.849	inositol 1,4,5-trisphosphate receptor [Parasteatoda tepidariorum]
1198			1198	same @ 1197, 4084	XP_015908140.1	107.071	inositol 1,4,5-trisphosphate receptor [Parasteatoda tepidariorum]
		1203	1203	ctl	XP_021002656.1	100.138	mediator of RNA polymerase II transcription subunit 12-like protein [Parasteatoda tepidariorum]
1205			1205	paralogs	XP_015911861.1	152.14	sodium/potassium-transporting ATPase subunit beta-like [Parasteatoda tepidariorum]
		1206	1206	ctl	XP_015923066.1	79.337	propionyl-CoA carboxylase alpha chain, mitochondrial [Parasteatoda tepidariorum]
1219
1220			1220	ctl	XP_015929145.1	122.094	NADH dehydrogenase [ubiquinone] iron-sulfur protein 8, mitochondrial-like [Parasteatoda tepidariorum]
1228	1228	1228	1228	ctl	XP_015907029.1	78.9518	cleavage and polyadenylation specificity factor subunit 2 [Parasteatoda tepidariorum]
	1230
1238		1238	1238	same @ 3236	XP_015920860.1	103.99	mannose-1-phosphate guanyltransferase beta [Parasteatoda tepidariorum]
1241	1241		1241	ctl	XP_015913982.1	88.5817	60S ribosomal protein L5-A [Parasteatoda tepidariorum]
1245	1245	1245	1245	same @ 1246	XP_015914916.1	67.781	protein PRRC2C isoform X1 [Parasteatoda tepidariorum]
1246	1246	1246	1246	ctl	XP_015914916.1	105.916	protein PRRC2C isoform X1 [Parasteatoda tepidariorum]
1247	1247		1247	same @ 1246	XP_015914914.1	128.257	protein PRRC2C isoform X1 [Parasteatoda tepidariorum]
1250	1250	1250	1250	same @ 1251	XP_015930022.1	105.145	splicing factor 3B subunit 4 [Parasteatoda tepidariorum]
1251	1251	1251	1251	ctl	XP_015930022.1	128.642	splicing factor 3B subunit 4 [Parasteatoda tepidariorum]
1252	1252	1252	1252	same @ 1254	XP_015917010.1	125.176	DNA repair and recombination protein RAD54-like [Parasteatoda tepidariorum]
1254	1254		1254	ctl	XP_015917010.1	338.961	DNA repair and recombination protein RAD54-like [Parasteatoda tepidariorum]
1274		1274	1274	ctl	XP_015903481.1	121.324	DCN1-like protein 3 [Parasteatoda tepidariorum]
		1285			XP_021001513.1	83.1889	neurobeachin [Parasteatoda tepidariorum]
1290
1304
1306	1306		1306	ctl	XP_021002653.1	77.411	UDP-glucose:glycoprotein glucosyltransferase 1-like [Parasteatoda tepidariorum]
1308		1308	1308	ctl	XP_015903195.1	162.54	protein gustavus-like [Parasteatoda tepidariorum]
1347	1347		1347	paralogs	XP_015927845.1	91.2781	catenin delta-2 [Parasteatoda tepidariorum]
1368		1368	1368	same @ 1369, 2596	XP_015914886.1	82.4185	armadillo segment polarity protein-like isoform X1 [Parasteatoda tepidariorum]
			1369	same @ 1368, 2596	XP_015914886.1	95.9005	armadillo segment polarity protein-like isoform X1 [Parasteatoda tepidariorum]
			1372	ctl	XP_015918850.1	107.071	probable protein phosphatase 2C T23F11.1 [Parasteatoda tepidariorum]
1382		1382	1382	ctl	XP_015926392.1	115.161	alpha-aminoadipic semialdehyde dehydrogenase-like [Parasteatoda tepidariorum]
1391
1400
1408			1408	ctl	XP_015911333.1	96.2857	proteasome subunit beta type-3-like isoform X1 [Parasteatoda tepidariorum]
1411		1411	1411	ctl	XP_015911178.1	102.449	probable cytosolic iron-sulfur protein assembly protein CIAO1 homolog [Parasteatoda tepidariorum]
1439		1439	1439	paralogs	XP_015930768.1	67.781	ATP-binding cassette sub-family D member 3-like [Parasteatoda tepidariorum]
1448		1448	1448	ctl	XP_021000380.1	87.0409	neuropathy target esterase sws [Parasteatoda tepidariorum]
1453			1453	paralogs	XP_015931258.2	47.3654	LOW QUALITY PROTEIN: sodium channel protein para [Parasteatoda tepidariorum]
		1455			XP_015908039.1	64.3142	1-phosphatidylinositol 4,5-bisphosphate phosphodiesterase epsilon-1 [Parasteatoda tepidariorum]
1464	1464	1464			XP_021004531.1	82.4185	myotubularin-related protein 6 [Parasteatoda tepidariorum]
	1469	1469	1469	ctl	XP_015919763.1	164.851	BTB/POZ domain-containing protein 2 [Parasteatoda tepidariorum]
1498		1498			XP_015916009.1	106.686	COP9 signalosome complex subunit 1-like isoform X1 [Parasteatoda tepidariorum]
1501		1501	1501	ctl	XP_015918441.1	114.775	polyphosphoinositide phosphatase [Parasteatoda tepidariorum]
1507			1507	paralogs	XP_015923373.1	46.9802	glutamate receptor ionotropic, kainate 2 isoform X1 [Parasteatoda tepidariorum]
	1547	1547	1547	ctl	XP_015914323.1	153.295	E3 ubiquitin-protein ligase RING2 [Parasteatoda tepidariorum]
1552		1552	1552	same as 5403	XP_015916018.2	135.576	striatin-interacting protein 1 homolog [Parasteatoda tepidariorum]
	1559	1559	1559	ctl	XP_015929976.1	64.6994	sorting nexin-3 isoform X1 [Parasteatoda tepidariorum]
1569
1571		1571	1571	paralogs	XP_015919835.1	86.6557	splicing factor U2AF 50 kDa subunit [Parasteatoda tepidariorum]
1579
1582	1582	1582	1582	ctl	XP_015913830.2	105.145	protein unc-13 homolog A-like [Parasteatoda tepidariorum]
1584	1584		1584	paralogs	XP_015929997.1	107.842	protein argonaute-2-like isoform X1 [Parasteatoda tepidariorum]
			1585	paralogs	XP_015929997.1	69.707	protein argonaute-2-like isoform X1 [Parasteatoda tepidariorum]
1601	1601	1601	1601	ctl	XP_015928678.1	118.242	DNA-directed RNA polymerase II subunit RPB3 [Parasteatoda tepidariorum]
			1602	same @ 1601	XP_015928678.1	108.227	DNA-directed RNA polymerase II subunit RPB3 [Parasteatoda tepidariorum]
1605	1605		1605	ctl	XP_021004466.1	164.851	40S ribosomal protein SA [Parasteatoda tepidariorum]
1609	1609	1609	1609	ctl	XP_015922717.1	149.443	ephrin type-B receptor 1-B isoform X1 [Parasteatoda tepidariorum]
1613	1613		1613	paralogs	XP_021001466.1	113.235	SH3 domain-containing RING finger protein 3 [Parasteatoda tepidariorum]
1620	1620	1620	1620	ctl	XP_015930491.1	107.457	eukaryotic peptide chain release factor GTP-binding subunit ERF3A-like [Parasteatoda tepidariorum]
1639			1639	ctl	XP_015903334.1	83.1889	ATP-dependent RNA helicase DDX39A-like [Parasteatoda tepidariorum]
		1646	1646	same @ 1647	XP_015925425.1	128.642	E3 ubiquitin-protein ligase HECTD1 isoform X1 [Parasteatoda tepidariorum]
1647	1647	1647	1647	ctl	XP_015925425.1	125.561	E3 ubiquitin-protein ligase HECTD1 isoform X1 [Parasteatoda tepidariorum]
1648
1654	1654		1654	ctl	XP_021000384.1	97.0561	drebrin-like protein [Parasteatoda tepidariorum]
1656	1656	1656	1656	ctl	XP_015908873.1	122.094	poly(U)-binding-splicing factor PUF60 isoform X1 [Parasteatoda tepidariorum]
1672	1672	1672	1672	same @ 2668	XP_015907384.1	113.62	AP-1 complex subunit beta-1 [Parasteatoda tepidariorum]
1682	1682	1682	1682	same @ 1683	XP_015930832.1	91.6633	pre-mRNA 3' end processing protein WDR33 [Parasteatoda tepidariorum]
1683	1683	1683	1683	ctl	XP_015930832.1	107.457	pre-mRNA 3' end processing protein WDR33 [Parasteatoda tepidariorum]
1692	1692	1692	1692	ctl	XP_021004440.1	126.716	phosphatidylinositol 4,5-bisphosphate 3-kinase catalytic subunit alpha isoform-like [Parasteatoda tepidariorum]
1693		1693	1693	same @ 1692	XP_021004440.1	108.227	phosphatidylinositol 4,5-bisphosphate 3-kinase catalytic subunit alpha isoform-like [Parasteatoda tepidariorum]
1708	1708	1708	1708	ctl	XP_015907787.1	91.2781	protein transport protein Sec61 subunit alpha [Parasteatoda tepidariorum]
		1715	1715	ctl	XP_015908646.1	119.398	protein furry-like [Parasteatoda tepidariorum]
1718		1718	1718	same @ 1715	XP_015908646.1	140.969	protein furry-like [Parasteatoda tepidariorum]
1719	1719
			1720	same @ 1715	XP_015908646.1	232.646	protein furry-like [Parasteatoda tepidariorum]
			1721	same @ 1715	XP_015908646.1	233.417	protein furry-like [Parasteatoda tepidariorum]
		1725	1725	ctl	XP_015923742.1	89.3521	RUS1 family protein C16orf58 homolog [Parasteatoda tepidariorum]
1743		1743	1743	ctl	XP_015925676.1	145.591	polycomb protein SCMH1 isoform X1 [Parasteatoda tepidariorum]
1744		1744	1744	ctl	XP_015924509.2	95.5153	serine/threonine-protein kinase 40 [Parasteatoda tepidariorum]
1748
1752		1752		not in matrix; same @ 1753	XP_015931017.1	125.561	elongation factor 2 [Parasteatoda tepidariorum]
1753			1753	ctl	XP_015931017.1	130.954	elongation factor 2 [Parasteatoda tepidariorum]
		1763	1763	ctl	XP_021001566.1	97.8265	protein transport protein Sec31A-like [Parasteatoda tepidariorum]
1768	1768	1768	1768	paralogs	XP_015918364.1	111.694	adapter molecule Crk [Parasteatoda tepidariorum]
		1772	1772	ctl	XP_015920227.1	218.009	RNA-binding protein Nova-1 isoform X1 [Parasteatoda tepidariorum]
		1792	1792	paralogs	XP_015914853.1	115.931	uncharacterized protein LOC107445052 [Parasteatoda tepidariorum]
1794		1794			XP_015918747.1	95.1301	actin-related protein 6 [Parasteatoda tepidariorum]
1797	1797		1797	ctl	XP_021004118.1	123.25	ubiquitin carboxyl-terminal hydrolase 34 [Parasteatoda tepidariorum]
1801		1801	1801	ctl	XP_015917789.1	115.161	vesicular inhibitory amino acid transporter-like [Parasteatoda tepidariorum]
1803		1803		not in matrix; same @ 1801	XP_015917789.1	62.003	vesicular inhibitory amino acid transporter-like [Parasteatoda tepidariorum]
1804	1804	1804	1804	ctl	XP_015904971.2	162.925	uncharacterized protein LOC107437471 [Parasteatoda tepidariorum]
1807
1810		1810		not in matrix; same @ 1812	XP_015906134.1	185.652	ankyrin-3 [Parasteatoda tepidariorum]
1812		1812	1812	ctl	XP_015906134.1	337.421	ankyrin-3 [Parasteatoda tepidariorum]
1824	1824	1824	1824	ctl	XP_015913259.1	100.908	threonine--tRNA ligase, cytoplasmic isoform X1 [Parasteatoda tepidariorum]
		1826	1826	ctl	no annotation
1848			1848	ctl	XP_015924847.1	164.851	U5 small nuclear ribonucleoprotein 200 kDa helicase-like [Parasteatoda tepidariorum]
1849			1849	same @ 1849, 2480	XP_015924847.1	198.749	U5 small nuclear ribonucleoprotein 200 kDa helicase-like [Parasteatoda tepidariorum]
1850	1850	1850	1850	ctl, but same @ 1849, 2480	XP_015924847.1	115.931	U5 small nuclear ribonucleoprotein 200 kDa helicase-like [Parasteatoda tepidariorum]
1855	1855	1855	1855	ctl	XP_015906118.1	95.5153	triple functional domain protein isoform X1 [Parasteatoda tepidariorum]
		1858	1858	ctl	XP_015930606.1	75.485	MOB kinase activator-like 2 isoform X5 [Parasteatoda tepidariorum]
1862		1862	1862	ctl	XP_015917573.1	72.4034	PHD finger protein 14-like [Parasteatoda tepidariorum]
1873	1873	1873	1873	ctl	XP_021001554.1	116.701	phosphatidylinositol 3-kinase catalytic subunit type 3-like [Parasteatoda tepidariorum]
1877
1890		1890	1890	ctl	XP_021000086.1	119.783	small nuclear ribonucleoprotein Sm D2 [Parasteatoda tepidariorum]
		1891	1891	ctl	XP_015920217.1	92.0485	transmembrane protein adipocyte-associated 1-like isoform X1 [Parasteatoda tepidariorum]
1892		1892	1892	ctl	XP_015930548.1	105.531	ubiquitin-conjugating enzyme E2 variant 2 isoform X1 [Parasteatoda tepidariorum]
1901	1901		1901	paralogs	XP_021001791.1	130.568	calcium uniporter protein, mitochondrial-like [Parasteatoda tepidariorum]
	1902	1902	1902	ctl	XP_015907014.1	150.599	Golgi-specific brefeldin A-resistance guanine nucleotide exchange factor 1 isoform X1 [Parasteatoda tepidariorum]
1919		1919	1919	same @ 1920	XP_015929428.1	95.9005	E3 ubiquitin-protein ligase UBR5 isoform X1 [Parasteatoda tepidariorum]
1920	1920	1920	1920	ctl	XP_015929428.1	166.392	E3 ubiquitin-protein ligase UBR5 isoform X1 [Parasteatoda tepidariorum]
1921	1921	1921	1921	same @ 1920	XP_015929428.1	127.102	E3 ubiquitin-protein ligase UBR5 isoform X1 [Parasteatoda tepidariorum]
1923		1923	1923	same @ 2010, 4027, 4175	XP_021000807.1	187.578	spectrin alpha chain [Parasteatoda tepidariorum]
1924
1936	1936	1936	1936	ctl	XP_015916258.1	98.9821	dynamin-1-like protein [Parasteatoda tepidariorum]
1960			1960	ctl	XP_015917219.1	82.4185	protein still life, isoform SIF type 1-like isoform X1 [Parasteatoda tepidariorum]
1965			1965	paralogs	XP_021004082.1	56.9954	coiled-coil domain-containing protein AGAP005037 isoform X1 [Parasteatoda tepidariorum]
		1970		not in matrix; same @ 1971	XP_015914325.1	83.1889	tetratricopeptide repeat protein 30A [Parasteatoda tepidariorum]
1971	1971	1971	1971	ctl	XP_015914325.1	88.5817	tetratricopeptide repeat protein 30A [Parasteatoda tepidariorum]
1976		1976	1976	ctl	XP_015910673.1	103.219	developmentally-regulated GTP-binding protein 1 [Parasteatoda tepidariorum]
1978
			1990	ctl	`	218.394	serine/threonine-protein kinase MARK2 [Parasteatoda tepidariorum]
1998	1998	1998	1998	ctl	XP_015928594.1	121.324	uncharacterized protein LOC107455513 isoform X1 [Parasteatoda tepidariorum]
2002			2002	ctl	XP_015907555.1	97.0561	NAD-dependent protein deacylase sirtuin-5, mitochondrial-like [Parasteatoda tepidariorum]
2004	2004	2004	2004	ctl	XP_020999845.1	117.087	E3 ubiquitin-protein ligase HECW1 [Parasteatoda tepidariorum]
2008
2010	2010	2010	2010	same @ 1923, 4027, 4175	XP_021000807.1	119.398	spectrin alpha chain [Parasteatoda tepidariorum]
2028		2028	2028	ctl	XP_015916372.1	141.354	60S ribosomal protein L24 [Parasteatoda tepidariorum]
		2037	2037	ctl	XP_015921052.1	95.5153	sarcosine dehydrogenase, mitochondrial-like [Parasteatoda tepidariorum]
2054		2054	2054	paralogs	XP_015917707.1	73.559	potassium voltage-gated channel subfamily KQT member 1 isoform X1 [Parasteatoda tepidariorum]
2058	2058		2058	ctl	XP_015923176.1	244.202	probable isocitrate dehydrogenase [NAD] subunit beta, mitochondrial [Parasteatoda tepidariorum]
2070	2070		2070	ctl	XP_021004600.1	78.9518	diacylglycerol kinase 1-like [Parasteatoda tepidariorum]
2073			2073	ctl	XP_015925728.1	100.908	integrator complex subunit 11 [Parasteatoda tepidariorum]
		2079	2079	ctl	XP_015909967.1	123.635	neurofibromin-like isoform X1 [Parasteatoda tepidariorum]
2080			2080	same @ 2079, 3428	XP_015909967.1	219.55	neurofibromin-like isoform X1 [Parasteatoda tepidariorum]
2081	2081	2081	2081	ctl	XP_021003103.1	144.436	POU domain, class 6, transcription factor 1-like [Parasteatoda tepidariorum]
2092	2092	2092	2092	ctl	XP_015906994.2	111.694	xenotropic and polytropic retrovirus receptor 1 homolog [Parasteatoda tepidariorum]
			2099	paralogs	XP_015903775.1	65.0846	T-complex protein 1 subunit eta-like [Parasteatoda tepidariorum]
2109
	2115	2115	2115	ctl	XP_015928826.1	145.206	tubby-related protein 4-like [Parasteatoda tepidariorum]
2122	2122		2122	ctl	XP_021002956.1	141.354	proliferating cell nuclear antigen-like [Parasteatoda tepidariorum]
2125	2125	2125	2125	ctl	XP_015906953.1	103.99	serine/threonine-protein kinase mTOR [Parasteatoda tepidariorum]
2126		2126	2126	ctl	XP_015928615.1	107.457	alpha-mannosidase 2 isoform X1 [Parasteatoda tepidariorum]
2137	2137	2137	2137	ctl	no annotation
	2138	2138	2138	same @ 2139	XP_015917574.1	148.673	Golgi phosphoprotein 3 homolog sauron [Parasteatoda tepidariorum]
		2139	2139	ctl	XP_015917574.1	189.889	Golgi phosphoprotein 3 homolog sauron [Parasteatoda tepidariorum]
2148	2148	2148			XP_015911243.1	73.9442	uncharacterized protein LOC107442241 [Parasteatoda tepidariorum]
2159		2159	2159	ctl	XP_021000009.1	125.561	histone-lysine N-methyltransferase E(z)-like [Parasteatoda tepidariorum]
2185	2185	2185	2185	ctl	XP_015904658.1	143.665	cytoplasmic dynein 1 heavy chain 1-like, partial [Parasteatoda tepidariorum]
2186	2186	2186	2186	same @ 2185	XP_015904658.1	110.923	cytoplasmic dynein 1 heavy chain 1-like, partial [Parasteatoda tepidariorum]
2187	2187	2187	2187	ctl	XP_021002603.1	105.916	dynein heavy chain, cytoplasmic [Parasteatoda tepidariorum]
2191	2191	2191	2191	same @ 2187	XP_021002603.1	135.576	dynein heavy chain, cytoplasmic [Parasteatoda tepidariorum]
	2192	2192		not in matrix; same @ 2187	XP_021002603.1	125.176	dynein heavy chain, cytoplasmic [Parasteatoda tepidariorum]
2193		2193	2193	same @ 2187	XP_021002603.1	118.627	dynein heavy chain, cytoplasmic [Parasteatoda tepidariorum]
2196		2196	2196	same @ 2187	XP_021002603.1	115.546	dynein heavy chain, cytoplasmic [Parasteatoda tepidariorum]
2199
2208	2208	2208	2208	same @ 4417	XP_021004185.1	100.523	macoilin-1-like [Parasteatoda tepidariorum]
2210		2210			XP_015903432.1	146.747	protein FAM46C-like isoform X1 [Parasteatoda tepidariorum]
2216	2216		2216	paralogs	XP_015912788.1	78.5666	phosphatidate cytidylyltransferase, photoreceptor-specific-like isoform X1 [Parasteatoda tepidariorum]
2219	2219	2219	2219	ctl	XP_015928991.1	174.866	cleavage and polyadenylation specificity factor subunit 4 [Parasteatoda tepidariorum]
2226	2226	2226	2226	ctl	KFM56806.1	85.1149	Protein AF-10, partial [Stegodyphus mimosarum]
2227	2227	2227	2227	paralogs	XP_015927820.1	114.775	NADH-ubiquinone oxidoreductase 75 kDa subunit, mitochondrial [Parasteatoda tepidariorum]
2230	2230		2230	ctl	XP_015929579.2	149.828	probable G-protein coupled receptor CG31760 [Parasteatoda tepidariorum]
2236
2241	2241		2241	ctl	XP_015909627.1	77.0258	uncharacterized protein LOC107441015 [Parasteatoda tepidariorum]
2245		2245	2245	ctl	XP_015919563.1	121.324	vacuolar protein sorting-associated protein 35 isoform X1 [Parasteatoda tepidariorum]
2249
2250		2250	2250	paralogs	XP_015929155.1	164.466	N6-adenosine-methyltransferase subunit METTL3-like [Parasteatoda tepidariorum]
		2257	2257	ctl	XP_021003868.1	117.857	glycine dehydrogenase (decarboxylating), mitochondrial-like, partial [Parasteatoda tepidariorum]
2261		2261	2261	ctl	XP_015924790.1	113.62	rho GDP-dissociation inhibitor 2 [Parasteatoda tepidariorum]
2262	2262	2262	2262	ctl	XP_015922590.1	114.775	actin-related protein 2/3 complex subunit 2-like isoform X1 [Parasteatoda tepidariorum]
2265
		2280	2280	ctl	XP_015923530.1	139.428	coronin-2B-like [Parasteatoda tepidariorum]
2281	2281	2281	2281	ctl	XP_015916553.1	91.2781	sugar phosphate exchanger 3-like isoform X1 [Parasteatoda tepidariorum]
2287	2287	2287	2287	ctl	no annotation
2290			2290	ctl	XP_021002784.1	88.9669	NAD(P) transhydrogenase, mitochondrial-like [Parasteatoda tepidariorum]
2296	2296	2296	2296	ctl	XP_015903626.1	133.65	plasma membrane calcium-transporting ATPase 2 isoform X1 [Parasteatoda tepidariorum]
		2303	2303	ctl	XP_015903715.1	77.0258	colorectal mutant cancer protein isoform X1 [Parasteatoda tepidariorum]
			2306	paralogs	XP_015911820.1	65.4698	zinc finger protein 271 [Parasteatoda tepidariorum]
2308	2308		2308	ctl	KFM56910.1	80.1073	14-3-3 protein zeta, partial [Stegodyphus mimosarum]
2314		2314	2314	ctl	XP_021002099.1	125.176	pre-mRNA-processing factor 17-like [Parasteatoda tepidariorum]
		2325	2325	ctl	XP_015925990.1	137.502	surfeit locus protein 4 homolog [Parasteatoda tepidariorum]
2336
2337		2337		not in matrix; same @ 2354	XP_015919108.1	177.948	pre-mRNA-processing-splicing factor 8 [Parasteatoda tepidariorum]
2344		2344		not in matrix; same @ 2354	XP_015919108.1	114.005	pre-mRNA-processing-splicing factor 8 [Parasteatoda tepidariorum]
2345
2347		2347	2347	same @ 2354	XP_015919108.1	215.698	pre-mRNA-processing-splicing factor 8 [Parasteatoda tepidariorum]
2350
	2354	2354	2354	ctl	XP_015919108.1	148.673	pre-mRNA-processing-splicing factor 8 [Parasteatoda tepidariorum]
2355		2355		not in matrix; same @ 2354	XP_015919108.1	157.918	pre-mRNA-processing-splicing factor 8 [Parasteatoda tepidariorum]
2357		2357		not in matrix; same @ 2354	XP_015919108.1	124.405	pre-mRNA-processing-splicing factor 8 [Parasteatoda tepidariorum]
	2372	2372	2372	same @ 2374	XP_020999997.1	101.293	RNA polymerase-associated protein CTR9 homolog [Parasteatoda tepidariorum]
2374		2374	2374	same @ 2372	XP_020999997.1	97.4413	RNA polymerase-associated protein CTR9 homolog [Parasteatoda tepidariorum]
2393	2393	2393	2393	same @ 2394	XP_015912196.1	147.132	E3 ubiquitin-protein ligase Su(dx)-like [Parasteatoda tepidariorum]
2394	2394	2394	2394	ctl	XP_015912196.1	125.561	E3 ubiquitin-protein ligase Su(dx)-like [Parasteatoda tepidariorum]
	2396	2396	2396	ctl	XP_015910355.1	119.783	negative elongation factor A [Parasteatoda tepidariorum]
2403	2403		2403	paralogs	XP_021004031.1	81.2629	ras-related protein Rab-1A [Parasteatoda tepidariorum]
2409			2409	ctl	XP_015917615.1	93.5893	protein lin-28 homolog [Parasteatoda tepidariorum]
		2417	2417	ctl	XP_021001100.1	87.4261	charged multivesicular body protein 1b-like [Parasteatoda tepidariorum]
2423		2423	2423	ctl	XP_021003354.1	109.768	endothelial transcription factor GATA-2-like isoform X1 [Parasteatoda tepidariorum]
2426		2426	2426	ctl	XP_021003748.1	96.2857	WD repeat and FYVE domain-containing protein 3 [Parasteatoda tepidariorum]
2432			2432	ctl	XP_015910892.1	72.7886	serine/threonine-protein kinase PRP4 homolog [Parasteatoda tepidariorum]
			2445	same @ 2451	XP_015920686.1	124.79	DNA-directed RNA polymerase II subunit RPB2 [Parasteatoda tepidariorum]
	2447	2447	2447	same @ 2451	XP_015920686.1	93.2041	DNA-directed RNA polymerase II subunit RPB2 [Parasteatoda tepidariorum]
2448	2448
2449
		2450		not in matrix; same @ 2451	XP_015920686.1	98.5969	DNA-directed RNA polymerase II subunit RPB2 [Parasteatoda tepidariorum]
2451	2451	2451	2451	ctl	XP_015920686.1	123.25	DNA-directed RNA polymerase II subunit RPB2 [Parasteatoda tepidariorum]
2464		2464	2464	ctl	XP_015908120.2	81.6481	stomatin-like protein 2, mitochondrial [Parasteatoda tepidariorum]
			2468	ctl	XP_015925812.1	114.39	general vesicular transport factor p115 [Parasteatoda tepidariorum]
2480		2480	2480	same @ 1848	XP_015924847.1	102.064	U5 small nuclear ribonucleoprotein 200 kDa helicase-like [Parasteatoda tepidariorum]
2481		2481	2481	ctl	XP_015906713.1	128.257	propionyl-CoA carboxylase beta chain, mitochondrial-like [Parasteatoda tepidariorum]
2491		2491	2491	ctl	XP_015913883.1	68.5514	3-hydroxy-3-methylglutaryl-coenzyme A reductase [Parasteatoda tepidariorum]
	2505		2505	paralogs	XP_015913406.1	206.453	2,3-bisphosphoglycerate-independent phosphoglycerate mutase-like [Parasteatoda tepidariorum]
2506	2506	2506	2506	ctl	XP_015918102.1	112.464	TM2 domain-containing protein 2-like [Parasteatoda tepidariorum]
	2514	2514	2514	ctl	XP_015905137.1	65.0846	kelch-like protein 3 [Parasteatoda tepidariorum]
2522	2522	2522	2522	ctl	XP_015922847.1	140.198	splicing factor 3B subunit 1 isoform X1 [Parasteatoda tepidariorum]
2523
2524	2524	2524	2524	same @ 2522	XP_015922847.1	99.7525	splicing factor 3B subunit 1 isoform X1 [Parasteatoda tepidariorum]
2525	2525	2525	2525	same @ 2522	XP_015922847.1	100.138	splicing factor 3B subunit 1 isoform X1 [Parasteatoda tepidariorum]
2526	2526	2526	2526	same @ 2522	XP_015922847.1	101.293	splicing factor 3B subunit 1 isoform X1 [Parasteatoda tepidariorum]
2527
			2528	same @ 2522	XP_015922847.1	173.326	splicing factor 3B subunit 1 isoform X1 [Parasteatoda tepidariorum]
2530	2530
		2531	2531	same @ 2533	XP_015914055.1	86.2705	ubiquitin carboxyl-terminal hydrolase 7 isoform X1 [Parasteatoda tepidariorum]
2532	2532	2532	2532	same @ 2533	XP_015914055.1	69.707	ubiquitin carboxyl-terminal hydrolase 7 isoform X1 [Parasteatoda tepidariorum]
2533	2533	2533	2533	ctl	XP_015914055.1	98.5969	ubiquitin carboxyl-terminal hydrolase 7 isoform X1 [Parasteatoda tepidariorum]
	2554
2559	2559		2559	ctl	XP_015919112.1	82.4185	RING finger protein 113A [Parasteatoda tepidariorum]
		2586			XP_021001594.1	135.191	myosin-I heavy chain [Parasteatoda tepidariorum]
2593		2593	2593	ctl	XP_015914318.1	158.688	ER lumen protein-retaining receptor [Parasteatoda tepidariorum]
2595	2595		2595	same @ 1368, 2596	XP_015914886.1	130.183	armadillo segment polarity protein-like isoform X1 [Parasteatoda tepidariorum]
2596			2596	ctl	XP_015914886.1	105.145	armadillo segment polarity protein-like isoform X1 [Parasteatoda tepidariorum]
2614	2614
2618	2618	2618	2618	ctl	XP_015928394.1	83.9593	NADPH--cytochrome P450 reductase [Parasteatoda tepidariorum]
2630	2630		2630	ctl	XP_021001062.1	153.68	GPI ethanolamine phosphate transferase 1-like [Parasteatoda tepidariorum]
2641		2641	2641	ctl	XP_015907914.1	85.1149	membralin [Parasteatoda tepidariorum]
2643	2643		2643	ctl	XP_015930265.2	118.627	V-type proton ATPase catalytic subunit A [Parasteatoda tepidariorum]
2644	2644		2644	same @ 2644	XP_015930265.2	81.6481	V-type proton ATPase catalytic subunit A [Parasteatoda tepidariorum]
2659			2659	paralogs	XP_015923569.1	111.309	neural-cadherin-like [Parasteatoda tepidariorum]
	2661	2661	2661	ctl	no annotation
2668		2668	2668	same @ 1672	XP_015907384.1	76.6406	AP-1 complex subunit beta-1 [Parasteatoda tepidariorum]
2669
			2676	paralogs	XP_022243341.1	65.4698	twitchin-like [Limulus polyphemus]
			2677	paralogs	no annotation
2687
2689	2689	2689	2689	ctl	XP_015917138.1	90.1225	putative pre-mRNA-splicing factor ATP-dependent RNA helicase PRP1 isoform X1 [Parasteatoda tepidariorum]
		2690	2690	ctl	XP_015920020.2	89.7373	cGMP-specific 3',5'-cyclic phosphodiesterase [Parasteatoda tepidariorum]
2692			2692	ctl	XP_015922458.1	155.221	CREB-binding protein isoform X1 [Parasteatoda tepidariorum]
2699		2699			XP_021004037.1	97.8265	transportin-1 [Parasteatoda tepidariorum]
2700	2700	2700	2700	ctl	no annotation
2701	2701	2701	2701	ctl	XP_021004037.1	114.775	transportin-1 [Parasteatoda tepidariorum]
	2712	2712	2712	same @ 2713	XP_015909551.1	96.6709	splicing factor 3B subunit 3-like [Parasteatoda tepidariorum]
2713		2713	2713	ctl	XP_015909551.1	90.5077	splicing factor 3B subunit 3-like [Parasteatoda tepidariorum]
2715	2715		2715	ctl	XP_021002020.1	92.4337	calpain-7-like [Parasteatoda tepidariorum]
2735		2735	2735	ctl	XP_015930284.2	121.709	26S proteasome non-ATPase regulatory subunit 11-like [Parasteatoda tepidariorum]
2736		2736	2736	ctl	XP_015907861.1	102.449	LIM and senescent cell antigen-like-containing domain protein 1 isoform X1 [Parasteatoda tepidariorum]
2745		2745	2745	ctl	XP_015924314.1	127.487	uncharacterized protein LOC107452366 [Parasteatoda tepidariorum]
2746	2746	2746	2746	same @ 2745	XP_015924314.1	104.76	uncharacterized protein LOC107452366 [Parasteatoda tepidariorum]
2749
	2764	2764	2764	ctl	no annotation
2769		2769	2769	ctl	XP_015929210.1	116.701	leucine-zipper-like transcriptional regulator 1 [Parasteatoda tepidariorum]
2774			2774	paralogs	XP_015928071.1	112.849	uncharacterized protein LOC107455124 [Parasteatoda tepidariorum]
2777	2777	2777	2777	ctl	XP_015909995.1	107.842	beta-1,4-mannosyltransferase egh [Parasteatoda tepidariorum]
2778
2793	2793	2793	2793	ctl	XP_015911661.2	120.168	mothers against decapentaplegic homolog 4 [Parasteatoda tepidariorum]
			2805	ctl	XP_021003690.1	111.694	arf-GAP with SH3 domain, ANK repeat and PH domain-containing protein 2 [Parasteatoda tepidariorum]
			2819	ctl	XP_015916048.1	77.411	protein pellino [Parasteatoda tepidariorum]
2822
2859		2859			XP_015915931.1	115.546	protein MON2 homolog [Parasteatoda tepidariorum]
		2875	2875	ctl	XP_021004165.1	85.5001	low-density lipoprotein receptor-related protein 1-like [Parasteatoda tepidariorum]
2876	2876	2876	2876	ctl	XP_021001686.1	119.398	otoferlin-like [Parasteatoda tepidariorum]
2886
		2888	2888	ctl	XP_015920111.1	173.711	kelch-like protein 26 [Parasteatoda tepidariorum]
2901			2901	paralogs	XP_015924187.1	87.0409	diacylglycerol kinase theta isoform X1 [Parasteatoda tepidariorum]
2907		2907	2907	ctl	XP_015905765.1	82.0333	alpha-actinin isoform X1 [Parasteatoda tepidariorum]
	2914
2919			2919	paralogs	XP_015929147.1	115.546	LOW QUALITY PROTEIN: trichohyalin-like [Parasteatoda tepidariorum]
2920	2920		2920	paralogs	XP_021002553.1	89.7373	kinesin-like protein KIF13A [Parasteatoda tepidariorum]
2925	2925		2925	ctl	XP_002409015.1	70.4774	Ca2\+/calmodulin-dependent protein kinase, putative, partial [Ixodes scapularis]
		2926	2926	ctl	XP_021002166.1	104.76	plastin-2-like [Parasteatoda tepidariorum]
2928		2928	2928	ctl	XP_015909726.1	105.145	26S protease regulatory subunit 7 [Parasteatoda tepidariorum]
		2938	2938	same @ 590	XP_015927848.1	149.443	myosin-VIIa isoform X1 [Parasteatoda tepidariorum]
	2947		2947	ctl	XP_021001198.1	100.523	ral GTPase-activating protein subunit alpha-1, partial [Parasteatoda tepidariorum]
2952		2952	2952	ctl	XP_015930256.1	168.703	apoptosis-inducing factor 1, mitochondrial-like [Parasteatoda tepidariorum]
2967
2974		2974	2974	ctl	XP_015907081.1	99.7525	sarcolemmal membrane-associated protein [Parasteatoda tepidariorum]
	2977
2978			2978	ctl	XP_021003171.1	76.2554	eukaryotic translation initiation factor 3 subunit C-like [Parasteatoda tepidariorum]
2982
2983		2983	2983	ctl	XP_015909440.1	119.398	phosphate carrier protein, mitochondrial-like [Parasteatoda tepidariorum]
		2986	2986	ctl	XP_015909345.1	99.3673	voltage-dependent calcium channel gamma-7 subunit-like [Parasteatoda tepidariorum]
3014	3014
3022	3022	3022	3022	ctl	XP_015916717.1	123.635	probable ATP-dependent RNA helicase DDX23 [Parasteatoda tepidariorum]
3050	3050	3050	3050	ctl	XP_015905136.1	131.339	U4/U6.U5 tri-snRNP-associated protein 2 [Parasteatoda tepidariorum]
		3051	3051	ctl	XP_015914103.2	101.293	regulator of telomere elongation helicase 1 homolog isoform X1 [Parasteatoda tepidariorum]
3053	3053	3053	3053	ctl	XP_015914011.1	111.309	tRNA-splicing ligase RtcB homolog [Parasteatoda tepidariorum]
			3054	ctl	XP_015924728.1	151.369	CMP-sialic acid transporter 1-like [Parasteatoda tepidariorum]
3063			3063	paralogs	XP_015917076.1	97.8265	uncharacterized protein LOC107446821 isoform X5 [Parasteatoda tepidariorum]
3065	3065	3065	3065	ctl	XP_015922262.1	112.464	26S proteasome non-ATPase regulatory subunit 1 [Parasteatoda tepidariorum]
3066	3066	3066	3066	same @ 3068	XP_021000124.1	96.6709	structural maintenance of chromosomes protein 3-like [Parasteatoda tepidariorum]
3067	3067	3067	3067	same @ 3068	XP_021000124.1	87.4261	structural maintenance of chromosomes protein 3-like [Parasteatoda tepidariorum]
3068	3068	3068	3068	ctl	XP_021000124.1	76.6406	structural maintenance of chromosomes protein 3-like [Parasteatoda tepidariorum]
3074			3074	ctl	XP_015928064.1	70.8626	charged multivesicular body protein 3 [Parasteatoda tepidariorum]
3078
3081	3081
			3082	ctl	XP_015916125.1	140.198	fumarate hydratase, mitochondrial [Parasteatoda tepidariorum]
3086		3086	3086	ctl	XP_015915053.1	82.4185	phosphoglucomutase-2-like [Parasteatoda tepidariorum]
3088	3088
3089	3089
3090	3090	3090	3090	ctl	XP_015920234.1	138.658	SNW domain-containing protein 1-like [Parasteatoda tepidariorum]
3102	3102	3102	3102	same @ 3103	XP_015922997.1	96.2857	putative GPI-anchor transamidase [Parasteatoda tepidariorum]
3103		3103	3103	ctl	XP_015922997.1	69.707	putative GPI-anchor transamidase [Parasteatoda tepidariorum]
3112	3112		3112	ctl	XP_015907481.1	92.8189	ionotropic receptor 25a-like [Parasteatoda tepidariorum]
3125		3125	3125	ctl	XP_021002796.1	99.3673	sideroflexin-1 isoform X1 [Parasteatoda tepidariorum]
	3129
3148
3151	3151		3151	ctl	XP_021000095.1	67.3958	bifunctional lysine-specific demethylase and histidyl-hydroxylase NO66 isoform X3 [Parasteatoda tepidariorum]
3162	3162	3162	3162	ctl	no annotation
3165		3165	3165	ctl	XP_015910442.1	84.3445	DNA helicase INO80 isoform X1 [Parasteatoda tepidariorum]
3169			3169	paralogs	XP_021004600.1	80.1073	diacylglycerol kinase 1-like [Parasteatoda tepidariorum]
3170			3170	ctl	KFM60145.1	122.094	Diacylglycerol kinase theta, partial [Stegodyphus mimosarum]
3183	3183	3183	3183	ctl	XP_015911633.1	108.997	exocyst complex component 6B isoform X1 [Parasteatoda tepidariorum]
	3194		3194	paralogs	XP_015926802.2	97.4413	uncharacterized protein LOC107454206 [Parasteatoda tepidariorum]
		3199	3199	ctl	XP_015906504.1	102.449	NAD-dependent protein deacetylase sirtuin-1 [Parasteatoda tepidariorum]
	3201	3201	3201	ctl	XP_015922792.1	154.451	pyroglutamylated RFamide peptide receptor-like [Parasteatoda tepidariorum]
3214			3214	ctl	XP_021001266.1	125.176	gamma-aminobutyric acid type B receptor subunit 1-like [Parasteatoda tepidariorum]
3215	3215	3215	3215	ctl	XP_015912201.1	152.525	ubiquitin domain-containing protein 2 isoform X1 [Parasteatoda tepidariorum]
		3216		not in matrix; same @ 3215	XP_015912201.1	92.8189	ubiquitin domain-containing protein 2 isoform X1 [Parasteatoda tepidariorum]
3225		3225	3225	ctl	XP_015911146.1	117.087	gamma-tubulin complex component 2 [Parasteatoda tepidariorum]
3236		3236	3236	same as 1238	XP_015920860.1	87.0409	mannose-1-phosphate guanyltransferase beta [Parasteatoda tepidariorum]
3239			3239	paralogs	XP_015912039.1	114.775	dentin sialophosphoprotein [Parasteatoda tepidariorum]
3244			3244	ctl	KFM60145.1	122.094	Diacylglycerol kinase theta, partial [Stegodyphus mimosarum]
3253	3253	3253	3253	ctl	XP_015926876.1	79.337	LOW QUALITY PROTEIN: pecanex-like protein 1 [Parasteatoda tepidariorum]
3254
3257	3257		3257	paralogs	XP_021004170.1	75.0998	transient receptor potential cation channel subfamily V member 5 [Parasteatoda tepidariorum]
3267		3267	3267	paralogs	XP_015906690.1	114.775	protein mothers against dpp isoform X1 [Parasteatoda tepidariorum]
3274		3274	3274	ctl	XP_015924564.2	100.138	ribonuclease 3-like [Parasteatoda tepidariorum]
	3278	3278	3278	ctl	XP_015904539.1	134.42	DNA damage-binding protein 1-like [Parasteatoda tepidariorum]
3283	3283		3283	ctl	XP_015915325.1	71.633	cyclin-T2 [Parasteatoda tepidariorum]
3288			3288	ctl	KFM59744.1	113.62	Forkhead box protein O, partial [Stegodyphus mimosarum]
	3297	3297	3297	ctl	XP_015928243.1	103.99	ras-related protein Rab-11A [Parasteatoda tepidariorum]
3299		3299	3299	ctl	XP_015911330.1	112.464	pre-mRNA-splicing regulator WTAP isoform X1 [Parasteatoda tepidariorum]
3300
3312	3312	3312	3312	ctl	XP_015929739.1	110.153	ras-related protein Rab-5C-like [Parasteatoda tepidariorum]
3315		3315	3315	same @ 3316	XP_021003514.1	83.5741	COP9 signalosome complex subunit 5-like [Parasteatoda tepidariorum]
3316	3316	3316	3316	ctl	XP_021003514.1	116.701	COP9 signalosome complex subunit 5-like [Parasteatoda tepidariorum]
3317
	3328	3328	3328	paralogs	XP_015903474.1	115.161	enolase [Parasteatoda tepidariorum]
3332		3332	3332	same @ 3334; paralogs	XP_015911666.1	94.7449	DNA-directed RNA polymerase II subunit RPB1 [Parasteatoda tepidariorum]
3333		3333	3333	same @ 3334	XP_015911666.1	91.6633	DNA-directed RNA polymerase II subunit RPB1 [Parasteatoda tepidariorum]
3334		3334	3334	ctl	XP_015911666.1	135.576	DNA-directed RNA polymerase II subunit RPB1 [Parasteatoda tepidariorum]
3336		3336	3336	same @ 3334	XP_015911666.1	146.747	DNA-directed RNA polymerase II subunit RPB1 [Parasteatoda tepidariorum]
3339			3339	same @ 3334	XP_015911666.1	203.371	DNA-directed RNA polymerase II subunit RPB1 [Parasteatoda tepidariorum]
3340	3340	3340	3340	same @ 3334	XP_015911666.1	143.28	DNA-directed RNA polymerase II subunit RPB1 [Parasteatoda tepidariorum]
3341			3341	same @ 3334	XP_015911666.1	166.007	DNA-directed RNA polymerase II subunit RPB1 [Parasteatoda tepidariorum]
	3342
3362	3362	3362	3362	ctl	KFM79246.1	73.559	F-box-like/WD repeat-containing protein TBL1XR1, partial [Stegodyphus mimosarum]
3368		3368	3368	paralogs	XP_015922901.1	67.781	uncharacterized protein C45G9.7-like [Parasteatoda tepidariorum]
3369	3369	3369	3369	ctl	XP_015918838.1	101.293	E3 ubiquitin-protein ligase SIAH1 isoform X1 [Parasteatoda tepidariorum]
		3396	3396	ctl	XP_021003960.1	135.191	WD repeat-containing protein 44-like [Parasteatoda tepidariorum]
3397		3397		not in matrix; same @ 3396	XP_021003960.1	71.633	WD repeat-containing protein 44-like [Parasteatoda tepidariorum]
		3402	3402	ctl	XP_015912986.1	115.931	cyclin-dependent kinase 2-associated protein 1 [Parasteatoda tepidariorum]
3403		3403	3403	ctl	XP_015906955.1	115.161	cleavage and polyadenylation specificity factor subunit 1 [Parasteatoda tepidariorum]
3423		3423	3423	ctl	XP_021001970.1	137.502	zinc finger SWIM domain-containing protein 8 [Parasteatoda tepidariorum]
	3428	3428	3428	ctl	XP_015909967.1	154.836	neurofibromin-like isoform X1 [Parasteatoda tepidariorum]
3433	3433
	3453	3453	3453	ctl	XP_021003306.1	89.3521	signal transducer and activator of transcription 5B [Parasteatoda tepidariorum]
3462		3462	3462	ctl	XP_021004079.1	100.908	copper-transporting ATPase 1-like [Parasteatoda tepidariorum]
3464	3464	3464	3464	ctl	XP_015924602.1	140.969	rho GTPase-activating protein 190 isoform X1 [Parasteatoda tepidariorum]
3472	3472	3472	3472	ctl	XP_015923941.1	68.9366	ER degradation-enhancing alpha-mannosidase-like protein 1 [Parasteatoda tepidariorum]
		3477	3477	ctl	XP_015906838.1	128.642	cohesin subunit SA-1 [Parasteatoda tepidariorum]
			3478	paralogs	XP_015903843.1	72.4034	NADH dehydrogenase [ubiquinone] flavoprotein 1, mitochondrial [Parasteatoda tepidariorum]
3482			3482	ctl	XP_015925989.1	78.5666	leucine--tRNA ligase, cytoplasmic isoform X2 [Parasteatoda tepidariorum]
3493	3493		3493	ctl	XP_021003945.1	127.487	ribonucleoside-diphosphate reductase large subunit-like isoform X2 [Parasteatoda tepidariorum]
3495	3495	3495	3495	ctl	XP_015909383.1	97.8265	actin-related protein 3 [Parasteatoda tepidariorum]
3498	3498	3498	3498	ctl	no annotation
3505
3506		3506	3506	ctl	XP_015916514.1	114.39	ankyrin repeat domain-containing protein 12 [Parasteatoda tepidariorum]
3510	3510	3510	3510	ctl	XP_015929850.1	131.339	protein CWC15 homolog [Parasteatoda tepidariorum]
3519	3519	3519	3519	ctl	no annotation
3531	3531	3531			XP_015919890.1	129.413	AP-2 complex subunit mu [Parasteatoda tepidariorum]
3543		3543	3543	ctl	XP_015908310.1	179.489	double-stranded RNA-binding protein Staufen homolog 2 isoform X1 [Parasteatoda tepidariorum]
3547	3547		3547	ctl	KFM58971.1	84.3445	CTP synthase 1, partial [Stegodyphus mimosarum]
3554			3554	paralogs	XP_021000600.1	148.288	transcription initiation factor TFIID subunit 1 [Parasteatoda tepidariorum]
3571	3571	3571	3571	ctl	XP_015904380.1	119.398	phosphatidylserine synthase 1 [Parasteatoda tepidariorum]
3572		3572	3572	ctl	XP_015915080.1	152.91	intron-binding protein aquarius-like [Parasteatoda tepidariorum]
3573		3573		same @ 3572	XP_015915080.1	122.479	intron-binding protein aquarius-like [Parasteatoda tepidariorum]
3575		3575	3575	same @ 3572	XP_015915080.1	137.117	intron-binding protein aquarius-like [Parasteatoda tepidariorum]
3587		3587	3587	ctl	XP_015905651.1	102.064	zinc finger RNA-binding protein [Parasteatoda tepidariorum]
3611	3611	3611	3611	ctl	XP_015905887.1	82.0333	intraflagellar transport protein 172 homolog [Parasteatoda tepidariorum]
3616	3616	3616	3616	ctl	no annotation
3634	3646
3644			3644	same @ 538	XP_015905153.1	379.022	YTH domain-containing family protein 3-like [Parasteatoda tepidariorum]
3646
3654	3654		3654	ctl	XP_021002240.1	76.2554	helicase domino isoform X1 [Parasteatoda tepidariorum]
3662
3669	3669	3669	3669	ctl	XP_015915307.1	114.39	SH2B adapter protein 2-like [Parasteatoda tepidariorum]
3692		3692	3692	ctl	XP_015926661.1	98.2117	40S ribosomal protein S16 [Parasteatoda tepidariorum]
3695			3695	paralogs	XP_015928402.1	85.1149	lon protease homolog, mitochondrial-like [Parasteatoda tepidariorum]
3705	3705		3705	ctl	KFM59299.1	154.836	Crooked neck-like protein 1, partial [Stegodyphus mimosarum]
			3706	same @ 3705	XP_021001455.1	120.939	crooked neck-like protein 1 [Parasteatoda tepidariorum]
3712			3712	ctl	XP_015926452.1	69.707	GTPase-activating protein and VPS9 domain-containing protein 1 isoform X1 [Parasteatoda tepidariorum]
3715	3715	3715	3715	ctl	XP_021003098.1	98.5969	splicing factor 3A subunit 1-like [Parasteatoda tepidariorum]
3732
3745		3745			XP_015922209.1	94.3597	RYamide receptor-like [Parasteatoda tepidariorum]
3755
3756	3756	3756	3756	ctl	no annotation
3759		3759	3759	ctl	XP_015924515.1	83.1889	1-phosphatidylinositol 4,5-bisphosphate phosphodiesterase gamma-1 [Parasteatoda tepidariorum]
3764	3764	3764	3764	ctl	XP_015912038.1	189.504	lysine-specific demethylase 4A-like [Parasteatoda tepidariorum]
		3779	3779	ctl	XP_015905730.1	135.191	mitochondrial intermediate peptidase [Parasteatoda tepidariorum]
			3796	ctl	XP_015903986.1	93.2041	putative E3 ubiquitin-protein ligase UNKL [Parasteatoda tepidariorum]
	3779
	3802		3802	paralogs	XP_015915648.1	129.028	uncharacterized protein LOC107445692 [Parasteatoda tepidariorum]
3805		3805			XP_015915648.1	129.028	uncharacterized protein LOC107445692 [Parasteatoda tepidariorum]
3808
3811		3811	3811	paralogs	XP_015923987.1	74.7146	heparan-alpha-glucosaminide N-acetyltransferase-like isoform X1 [Parasteatoda tepidariorum]
3814	3814		3814	ctl	XP_015903994.1	97.0561	serine/threonine-protein phosphatase 2B catalytic subunit 2-like isoform X1 [Parasteatoda tepidariorum]
3817	3817	3817	3817	ctl	XP_021000231.1	120.168	regulator of nonsense transcripts 1-like [Parasteatoda tepidariorum]
3818	3818		3818	same @ 3817	XP_021000231.1	103.99	regulator of nonsense transcripts 1-like [Parasteatoda tepidariorum]
	3831		3831	ctl	XP_015913470.1	124.405	ras-related protein M-Ras-like [Parasteatoda tepidariorum]
3834	3834		3834	ctl	XP_015903448.1	104.76	eukaryotic peptide chain release factor subunit 1 [Parasteatoda tepidariorum]
3862		3862	3862	ctl	XP_015929246.1	83.9593	E3 ubiquitin-protein ligase MIB1 [Parasteatoda tepidariorum]
3866		3866	3866	ctl	XP_015915174.1	171.785	transmembrane protein 189 [Parasteatoda tepidariorum]
3869		3869	3869	ctl	XP_015926704.2	31.9574	wee1-like protein kinase 2 [Parasteatoda tepidariorum]
3873	3873	3873	3873	ctl	XP_015922413.1	92.8189	RNA-binding protein cabeza isoform X1 [Parasteatoda tepidariorum]
3875	3875
3898	3898		3898	ctl	XP_021002497.1	106.301	chromodomain-helicase-DNA-binding protein 7 [Parasteatoda tepidariorum]
3900	3900	3900	3900	ctl	XP_021001419.1	102.449	ATP-dependent RNA helicase DHX8 [Parasteatoda tepidariorum]
3932	3932	3932	3932	ctl	XP_015915148.1	93.2041	eukaryotic translation initiation factor 5A-1 [Parasteatoda tepidariorum]
3936
3947			3947	ctl	XP_015914689.1	93.9745	DDB1- and CUL4-associated factor 7 [Parasteatoda tepidariorum]
3948
			3965	paralogs	XP_021003195.1	153.295	coronin-6-like [Parasteatoda tepidariorum]
3985	3985	3985	3985	ctl	XP_015923225.1	67.3958	fukutin [Parasteatoda tepidariorum]
3993		3993	3993	ctl	XP_021001555.1	102.449	1-phosphatidylinositol 3-phosphate 5-kinase-like [Parasteatoda tepidariorum]
3995
4000	4000	4000	4000	ctl	XP_021004667.1	92.0485	(E3-independent) E2 ubiquitin-conjugating enzyme UBE2O [Parasteatoda tepidariorum]
4001	4001	4001	4001	same @ 4000	XP_021004667.1	82.4185	(E3-independent) E2 ubiquitin-conjugating enzyme UBE2O [Parasteatoda tepidariorum]
	4002	4002	4002	ctl	XP_015914078.1	104.76	BAH and coiled-coil domain-containing protein 1 isoform X1 [Parasteatoda tepidariorum]
4006			4006	paralogs	XP_015920583.1	56.225	ribonucleoside-diphosphate reductase subunit M2-like [Parasteatoda tepidariorum]
4007
4023	4023	4023	4023	ctl	XP_021003209.1	127.872	40S ribosomal protein S3 [Parasteatoda tepidariorum]
4024		4024	4024	ctl	XP_021003465.1	145.591	MBT domain-containing protein 1-like [Parasteatoda tepidariorum]
4025		4025	4025	ctl	XP_021000766.1	94.7449	spectrin alpha chain-like [Parasteatoda tepidariorum]
4026			4026	same @ 1923, 2010, 4027, 4175	XP_021000807.1	103.99	spectrin alpha chain [Parasteatoda tepidariorum]
4027	4027	4027	4027	same @ 1923, 2010, 4027, 4175	XP_021000807.1	94.3597	spectrin alpha chain [Parasteatoda tepidariorum]
4035	4037	4037			XP_021001505.1	107.457	E3 ubiquitin-protein ligase NEDD4-like, partial [Parasteatoda tepidariorum]
4038	4038		4038	paralogs	XP_015931037.1	80.1073	uncharacterized protein LOC107457394 [Parasteatoda tepidariorum]
			4043	same @ 4044	XP_021001419.1	130.954	ATP-dependent RNA helicase DHX8 [Parasteatoda tepidariorum]
4044	4044	4044	4044	ctl	XP_021001419.1	154.066	ATP-dependent RNA helicase DHX8 [Parasteatoda tepidariorum]
4050			4050	paralogs	XP_015920161.1	83.5741	voltage-dependent calcium channel type A subunit alpha-1 isoform X1 [Parasteatoda tepidariorum]
		4059	4059	ctl	XP_015918106.1	98.2117	LOW QUALITY PROTEIN: paraplegin-like [Parasteatoda tepidariorum]
	4064		4064	ctl	XP_015912772.1	77.7962	retinal rod rhodopsin-sensitive cGMP 3',5'-cyclic phosphodiesterase subunit delta [Parasteatoda tepidariorum]
4080		4080	4080	ctl	XP_015931041.1	158.303	atypical protein kinase C [Parasteatoda tepidariorum]
		4084	4084	same @ 1197, 4085	XP_015908140.1	97.8265	inositol 1,4,5-trisphosphate receptor [Parasteatoda tepidariorum]
			4085	same @ 1197, 4084	XP_015908140.1	58.9214	inositol 1,4,5-trisphosphate receptor [Parasteatoda tepidariorum]
			4090	ctl	XP_015907570.1	119.398	laminin subunit beta-1 isoform X3 [Parasteatoda tepidariorum]
4095	4095		4095	paralogs	XP_015930260.1	72.0182	E3 ubiquitin-protein ligase RNF185 [Parasteatoda tepidariorum]
4101	4101
	4109		4109	ctl	XP_015929231.1	108.612	menin isoform X1 [Parasteatoda tepidariorum]
4119			4119	ctl	XP_015911264.1	122.865	homeobox-containing protein 1 isoform X1 [Parasteatoda tepidariorum]
4120			4120	ctl	XP_021000568.1	121.324	vacuolar protein sorting-associated protein 26B-like, partial [Parasteatoda tepidariorum]
4121
4138	4138	4138	4138	ctl	XP_015903557.1	135.576	microtubule-associated serine/threonine-protein kinase 3-like isoform X1 [Parasteatoda tepidariorum]
4161	4161	4161
4162			4162	ctl	XP_015929424.1	126.716	tankyrase-2-like [Parasteatoda tepidariorum]
4173	4173	4173	4173	same @ 1923, 4175	XP_022239602.1	91.2781	spectrin alpha chain-like [Limulus polyphemus]
4175	4175	4175	4175	same @ 1923, 4175	XP_021000807.1	94.7449	spectrin alpha chain [Parasteatoda tepidariorum]
4181	4181	4181	4181	ctl	XP_021004458.1	108.612	phosphatidylinositol N-acetylglucosaminyltransferase subunit A-like [Parasteatoda tepidariorum]
4182
4185
4188	4188	4188	4188	ctl	XP_015905578.1	82.8037	60S ribosomal protein L35 [Parasteatoda tepidariorum]
		4192	4192	paralogs	XP_021003585.1	106.686	zinc finger protein castor homolog 1 isoform X3 [Parasteatoda tepidariorum]
4195	4195
	4199
4205		4205	4205	ctl	XP_015910760.1	87.8113	talin-2 [Parasteatoda tepidariorum]
	4206	4206	4206	same @ 4205, 5284	XP_015910760.1	100.523	talin-2 [Parasteatoda tepidariorum]
		4213	4213	paralogs	no annotation
4228	4228	4228	4228	ctl	XP_015921028.1	92.0485	sphingolipid delta(4)-desaturase DES1 [Parasteatoda tepidariorum]
		4231	4231	ctl	XP_015923192.2	151.369	ATPase family AAA domain-containing protein 2-like [Parasteatoda tepidariorum]
4234
4235		4235	4235	ctl	XP_015925299.1	129.798	actin-related protein 2/3 complex subunit 4 [Parasteatoda tepidariorum]
4236	4236	4236	4236	same @ 4235	XP_015925299.1	117.857	actin-related protein 2/3 complex subunit 4 [Parasteatoda tepidariorum]
4246	4246	4246	4246	ctl	XP_015919255.1	115.931	eukaryotic translation initiation factor 3 subunit I-like [Parasteatoda tepidariorum]
4254	4254	4254	4254	ctl	XP_015917304.1	136.346	uncharacterized protein LOC107447015 isoform X1 [Parasteatoda tepidariorum]
4255	4255	4255	4255	ctl	XP_015907416.1	145.206	transmembrane protein 47 [Parasteatoda tepidariorum]
4271	4271	4271	4271	ctl	XP_015907983.1	135.191	synaptotagmin-14-like isoform X1 [Parasteatoda tepidariorum]
4274	4274	4274	4274	same @ 4275	XP_015929577.2	98.2117	histone-binding protein RBBP4, partial [Parasteatoda tepidariorum]
4275	4275	4275	4275	ctl	XP_015929577.2	123.25	histone-binding protein RBBP4, partial [Parasteatoda tepidariorum]
4276		4276	4276	ctl	XP_015922177.1	146.747	histone-binding protein RBBP7 [Parasteatoda tepidariorum]
	4297
4301	4301	4301	4301	ctl	XP_015915207.1	92.0485	inositol hexakisphosphate and diphosphoinositol-pentakisphosphate kinase isoform X1 [Parasteatoda tepidariorum]
4304
4312	4312	4312	4312	same @ 4313	XP_015927117.2	104.76	N-alpha-acetyltransferase 15, NatA auxiliary subunit-like [Parasteatoda tepidariorum]
4313	4313		4313	ctl	XP_015927117.2	91.6633	N-alpha-acetyltransferase 15, NatA auxiliary subunit-like [Parasteatoda tepidariorum]
4325
4326			4326	ctl	XP_020999948.1	105.145	ubiquitin-conjugating enzyme E2 J2-like [Parasteatoda tepidariorum]
4331	4331	4331	4331	ctl	XP_015929629.1	131.724	E3 ubiquitin-protein ligase TRIM37-like [Parasteatoda tepidariorum]
4336	4336	4336	4336	ctl	XP_015916766.1	102.834	tetraspanin-5 isoform X1 [Parasteatoda tepidariorum]
		4351	4351	ctl	XP_015915188.1	92.0485	ubiquitin carboxyl-terminal hydrolase isozyme L5 [Parasteatoda tepidariorum]
4354	4354	4354	4354	ctl	XP_015916542.1	102.834	D-glucuronyl C5-epimerase [Parasteatoda tepidariorum]
4361	4361	4361	4361	ctl	XP_021000583.1	102.834	tight junction protein ZO-1 [Parasteatoda tepidariorum]
		4362	4362	ctl	XP_015905516.1	118.627	anaphase-promoting complex subunit 4 [Parasteatoda tepidariorum]
	4364
4396	4396		4396	ctl	XP_020999894.1	103.99	protein sel-1 homolog 1-like [Parasteatoda tepidariorum]
4398		4398			XP_015922926.1	92.0485	pancreas transcription factor 1 subunit alpha-like [Parasteatoda tepidariorum]
		4405	4405	ctl	XP_015910769.1	112.079	cytoplasmic aconitate hydratase-like, partial [Parasteatoda tepidariorum]
4406			4406	paralogs	XP_022253943.1	71.2478	uncharacterized protein LOC106469663 isoform X2 [Limulus polyphemus]
		4408	4408	same as 4409	XP_021003800.1	88.9669	ATP-citrate synthase-like [Parasteatoda tepidariorum]
	4409		4409	ctl	XP_021003800.1	149.828	ATP-citrate synthase-like [Parasteatoda tepidariorum]
4416	4416	4416	4416	paralogs	XP_021002101.1	119.783	uncharacterized protein LOC107445731 [Parasteatoda tepidariorum]
4417	4417	4417	4417	ctl	XP_021004185.1	98.2117	macoilin-1-like [Parasteatoda tepidariorum]
4424
4427			4427	ctl	XP_015916914.1	127.487	inositol-3-phosphate synthase-like [Parasteatoda tepidariorum]
4445		4445	4445	ctl	XP_015909581.1	194.512	calcium-dependent secretion activator isoform X8 [Parasteatoda tepidariorum]
4446	4446		4446	same @ 4445	XP_015909587.1	103.219	calcium-dependent secretion activator isoform X13 [Parasteatoda tepidariorum]
	4447	4447	4447	same @ 4451	XP_021001770.1	117.087	E3 ubiquitin-protein ligase UBR4 [Parasteatoda tepidariorum]
4448	4448	4448	4448	same @ 4451	XP_021001770.1	147.132	E3 ubiquitin-protein ligase UBR4 [Parasteatoda tepidariorum]
4449		4449	4449	same @ 4451	XP_021001770.1	127.487	E3 ubiquitin-protein ligase UBR4 [Parasteatoda tepidariorum]
4451	4451	4451	4451	ctl	XP_021001770.1	221.09	E3 ubiquitin-protein ligase UBR4 [Parasteatoda tepidariorum]
			4462	ctl	XP_015912427.1	244.202	engulfment and cell motility protein 1 [Parasteatoda tepidariorum]
4466
4467	4467
4468			4468	ctl	XP_015906770.1	301.212	bifunctional glutamate/proline--tRNA ligase [Parasteatoda tepidariorum]
			4478	ctl	XP_015908046.1	162.54	peregrin [Parasteatoda tepidariorum]
4487			4487	paralogs	XP_015920161.1	102.449	voltage-dependent calcium channel type A subunit alpha-1 isoform X1 [Parasteatoda tepidariorum]
		4503	4503	ctl	XP_021000977.1	102.834	glucose-6-phosphate 1-dehydrogenase X-like [Parasteatoda tepidariorum]
4489
4510
4520	4520	4520	4520	ctl	XP_021003128.1	108.997	26S protease regulatory subunit 8 [Parasteatoda tepidariorum]
4522	4522		4522	ctl	XP_015920056.1	152.525	116 kDa U5 small nuclear ribonucleoprotein component-like [Parasteatoda tepidariorum]
			4523	paralogs	XP_015931017.1	94.7449	elongation factor 2 [Parasteatoda tepidariorum]
4525	4525		4525	ctl	XP_015914710.1	257.299	heat shock protein 83 [Parasteatoda tepidariorum]
4534			4534	ctl	XP_015927313.1	130.954	UDP-N-acetylglucosamine--dolichyl-phosphate N-acetylglucosaminephosphotransferase [Parasteatoda tepidariorum]
4539	4539		4539	ctl	XP_015920675.1	177.563	zinc finger HIT domain-containing protein 1-like [Parasteatoda tepidariorum]
4558
4564	4564
4567	4567	4567	4567	ctl	XP_015907566.1	185.267	BTB/POZ domain-containing protein 6-B-like [Parasteatoda tepidariorum]
	4587		4587	ctl	XP_015909550.1	150.984	BTB/POZ domain-containing protein 9-like [Parasteatoda tepidariorum]
4600			4600	same as 4988	XP_015908838.1	104.375	ankyrin repeat and KH domain-containing protein 1 [Parasteatoda tepidariorum]
4603			4603	paralogs	XP_015922672.1	86.6557	ATP synthase subunit alpha, mitochondrial isoform X5 [Parasteatoda tepidariorum]
4628	4628	4628	4628	ctl	XP_015919335.1	138.272	40S ribosomal protein S14a [Parasteatoda tepidariorum]
4629	4629	4629	4629	ctl	XP_015911538.1	93.2041	probable phosphorylase b kinase regulatory subunit beta [Parasteatoda tepidariorum]
4630			4630	ctl	XP_015918347.1	82.4185	cytoplasmic dynein 1 light intermediate chain 2 [Parasteatoda tepidariorum]
4636	4636		4636	ctl	NP_001310737.1	167.548	protein patched-like [Parasteatoda tepidariorum]
4640	4640		4640	ctl	XP_015923561.1	209.149	protein FAM50 homolog [Parasteatoda tepidariorum]
4641	4641	4641	4641	same as 4640	XP_015923561.1	118.627	protein FAM50 homolog [Parasteatoda tepidariorum]
4651
4654
4701		4701			XP_021003579.1	172.17	uncharacterized protein LOC107445721 isoform X1 [Parasteatoda tepidariorum]
	4702		4702	paralogs	XP_015904133.1	101.679	zinc finger protein rotund-like [Parasteatoda tepidariorum]
	4707
4731	4731		4731	ctl	XP_021001513.1	83.9593	neurobeachin [Parasteatoda tepidariorum]
4732			4732	ctl	XP_015923316.1	97.0561	cysteine and histidine-rich protein 1-B-like, partial [Parasteatoda tepidariorum]
4737	4737		4737	ctl	XP_015919299.1	240.736	ATP-dependent zinc metalloprotease YME1 homolog [Parasteatoda tepidariorum]
4742	4742	4742	4742	ctl	XP_015926856.1	167.933	thioredoxin-like protein 4A [Parasteatoda tepidariorum]
4753	4753	4753	4753	ctl	XP_015923889.1	162.925	60S ribosomal protein L4-A [Parasteatoda tepidariorum]
4754	4754	4754	4754	ctl	XP_015910291.1	88.5817	acid phosphatase type 7-like [Parasteatoda tepidariorum]
4772
4784	4784	4784			XP_015905552.1	119.013	U2 snRNP-associated SURP motif-containing protein [Parasteatoda tepidariorum]
4787	4787	4787	4787	ctl	KFM79155.1	83.5741	hypothetical protein X975_11058, partial [Stegodyphus mimosarum]
4797		4797	4797	same @ 4798	XP_015927902.1	128.257	cytoplasmic FMR1-interacting protein-like [Parasteatoda tepidariorum]
4798	4798	4798	4798	ctl	XP_015927902.1	141.354	cytoplasmic FMR1-interacting protein-like [Parasteatoda tepidariorum]
		4810	4810	ctl	XP_021001332.1	120.939	26S proteasome non-ATPase regulatory subunit 2 [Parasteatoda tepidariorum]
4811	4811	4811	4811	paralogs	XP_015907122.1	181.8	protein phosphatase PP2A 55 kDa regulatory subunit isoform X1 [Parasteatoda tepidariorum]
4818		4818	4818	ctl	XP_015906444.1	128.642	uncharacterized protein C16orf52 homolog A-like [Parasteatoda tepidariorum]
	4825	4825	4825	ctl	XP_015925848.1	181.415	zinc finger homeobox protein 4-like [Parasteatoda tepidariorum]
4827	4827	4827	4827	ctl	XP_021001551.1	140.198	hydroxymethylglutaryl-CoA synthase 1 [Parasteatoda tepidariorum]
4832			4832	paralogs	XP_015905370.1	104.375	protein roadkill [Parasteatoda tepidariorum]
4837		4837	4837	ctl	XP_015915173.1	208.764	neurocalcin homolog [Parasteatoda tepidariorum]
4838
			4846	paralogs	XP_021002818.1	73.9442	transcription elongation factor SPT5-like [Parasteatoda tepidariorum]
	4847		4847	ctl	XP_021002818.1	101.293	transcription elongation factor SPT5-like [Parasteatoda tepidariorum]
4851	4851	4851	4851	ctl	XP_002407510.1	65.855	voltage-gated ion channel, putative, partial [Ixodes scapularis]
4854	4854	4854	4854	ctl	XP_015928180.1	96.6709	60S acidic ribosomal protein P0-like [Parasteatoda tepidariorum]
4855
4856
4858		4858			XP_015921386.1	136.346	insulin gene enhancer protein ISL-1 isoform X1 [Parasteatoda tepidariorum]
4861	4861	4861	4861	ctl	XP_015913004.1	85.1149	chromodomain-helicase-DNA-binding protein Mi-2 homolog isoform X1 [Parasteatoda tepidariorum]
4864	4864	4864	4864	ctl	XP_015927527.2	155.606	LARGE xylosyl- and glucuronyltransferase 1-like [Parasteatoda tepidariorum]
4871			4871	ctl	XP_015922577.1	87.4261	cyclin-dependent-like kinase 5 [Parasteatoda tepidariorum]
4875	4875		4875	ctl	XP_015916472.1	151.754	actin-related protein 2 isoform X2 [Parasteatoda tepidariorum]
4884		4884			XP_015923917.1	151.754	epsin-2 isoform X1 [Parasteatoda tepidariorum]
4894		4894	4894	same @ 4895	XP_015910925.1	118.242	UDP-N-acetylglucosamine--peptide N-acetylglucosaminyltransferase 110 kDa subunit isoform X1 [Parasteatoda tepidariorum]
4895	4895	4895	4895	ctl	XP_015910925.1	211.46	UDP-N-acetylglucosamine--peptide N-acetylglucosaminyltransferase 110 kDa subunit isoform X1 [Parasteatoda tepidariorum]
4906	4906		4906	paralogs	XP_015913464.1	63.929	tyrosine-protein phosphatase non-receptor type 4 isoform X1 [Parasteatoda tepidariorum]
4928	4928
4954
4962			4962	same @ 4963	XP_015923088.1	100.908	ubiquitin-conjugating enzyme E2-22 kDa [Parasteatoda tepidariorum]
4963		4963	4963	ctl	XP_015923088.1	100.523	ubiquitin-conjugating enzyme E2-22 kDa [Parasteatoda tepidariorum]
4968			4968	ctl	XP_015904068.1	83.9593	dmX-like protein 2 [Parasteatoda tepidariorum]
	4970		4970	paralogs	no annotation
4988	4988	4988	4988	ctl	XP_015908838.1	121.324	ankyrin repeat and KH domain-containing protein 1 [Parasteatoda tepidariorum]
	4989	4989	4989	paralogs; same @ 4600, 4988	XP_015908838.1	110.538	ankyrin repeat and KH domain-containing protein 1 [Parasteatoda tepidariorum]
4998	4998	4998	4998	ctl	XP_015911908.1	92.8189	NADH dehydrogenase [ubiquinone] iron-sulfur protein 3, mitochondrial [Parasteatoda tepidariorum]
5005	5005	5005	5005	ctl	XP_015923394.1	105.145	cytosolic non-specific dipeptidase-like isoform X1 [Parasteatoda tepidariorum]
5010
5015	5015	5015	5015	ctl	XP_021000750.1	124.79	DNA (cytosine-5)-methyltransferase PliMCI [Parasteatoda tepidariorum]
5027	5027		5027	ctl	XP_021003609.1	103.99	glycine--tRNA ligase-like [Parasteatoda tepidariorum]
5043		5043			XP_015925112.1	117.087	F-box/LRR-repeat protein 12-like [Parasteatoda tepidariorum]
5057	5057	5057	5057	ctl	XP_021002323.1	122.865	ER membrane protein complex subunit 3 [Parasteatoda tepidariorum]
5064		5064	5064	ctl	XP_015907031.1	112.079	AP-3 complex subunit beta-1-like [Parasteatoda tepidariorum]
	5067	5067	5067	ctl	XP_015917189.1	108.997	lysine-specific histone demethylase 1A [Parasteatoda tepidariorum]
5068	5068	5068	5068	same @ 5068	XP_015917189.1	106.301	lysine-specific histone demethylase 1A [Parasteatoda tepidariorum]
5070		5070	5070	same @ 5068	XP_015917188.1	102.449	lysine-specific histone demethylase 1A [Parasteatoda tepidariorum]
5077			5077	paralogs	XP_015906881.1	187.193	leucine-rich repeat-containing G-protein coupled receptor 5-like [Parasteatoda tepidariorum]
		5078	5078	ctl	XP_021002075.1	73.9442	gamma-secretase subunit Aph-1 [Parasteatoda tepidariorum]
5082		5082			XP_015927447.1	115.161	26S proteasome non-ATPase regulatory subunit 12-like isoform X1 [Parasteatoda tepidariorum]
5083	5083	5083	5083	ctl	XP_015924725.1	115.931	kinesin-like protein unc-104 isoform X1 [Parasteatoda tepidariorum]
5089	5089	5089	5089	ctl	XP_015908335.1	161.77	ankyrin repeat domain-containing protein 50-like [Parasteatoda tepidariorum]
5090			5090	paralogs	XP_015908335.1	167.548	ankyrin repeat domain-containing protein 50-like [Parasteatoda tepidariorum]
5096			5096	paralogs	XP_021001512.1	82.0333	chromatin-remodeling complex ATPase chain Iswi [Parasteatoda tepidariorum]
5098		5098	5098	ctl	XP_015903768.1	147.517	cleavage and polyadenylation specificity factor 73-like [Parasteatoda tepidariorum]
			5100	same @ 5098	XP_015903768.1	245.743	cleavage and polyadenylation specificity factor 73-like [Parasteatoda tepidariorum]
	5101		5101	paralogs	XP_015913421.1	147.902	heterogeneous nuclear ribonucleoprotein R isoform X1 [Parasteatoda tepidariorum]
5108	5108	5108	5108	ctl	XP_015925985.1	108.997	protein crumbs [Parasteatoda tepidariorum]
5112	5112	5112	5112	ctl	XP_015904397.1	99.7525	ATP synthase lipid-binding protein, mitochondrial-like [Parasteatoda tepidariorum]
		5126			XP_015905155.1	123.25	cytochrome b-c1 complex subunit Rieske, mitochondrial-like [Parasteatoda tepidariorum]
5136	5136		5136	paralogs	XP_015909483.1	152.91	serine/threonine-protein phosphatase 2A 56 kDa regulatory subunit epsilon isoform isoform X1 [Parasteatoda tepidariorum]
			5137	paralogs	no annotation
5145
		5160			XP_015928508.1	82.8037	E3 ubiquitin-protein ligase HUWE1 isoform X1 [Parasteatoda tepidariorum]
		5171			XP_015907978.1	97.0561	nuclear transcription factor Y subunit gamma isoform X1 [Parasteatoda tepidariorum]
5173	5173	5173	5173	ctl	KFM61669.1	63.929	Msx2-interacting protein, partial [Stegodyphus mimosarum]
5186	5186	5186	5186	ctl	XP_015905473.1	139.428	kelch-like protein diablo [Parasteatoda tepidariorum]
5200	5200		5200	paralogs; same @ 5204	XP_021001145.1	99.7525	unconventional myosin-Va-like [Parasteatoda tepidariorum]
		5201	5201	same @ 5204	XP_021001145.1	124.405	unconventional myosin-Va-like [Parasteatoda tepidariorum]
5204	5204	5204	5204	ctl	XP_021001145.1	80.1073	unconventional myosin-Va-like [Parasteatoda tepidariorum]
	5205	5205	5205	same @ 5204	XP_021001145.1	84.7297	unconventional myosin-Va-like [Parasteatoda tepidariorum]
			5218	ctl	XP_015923569.1	173.711	neural-cadherin-like [Parasteatoda tepidariorum]
5223	5223	5223	5223	ctl	XP_015930686.1	112.849	glucose-6-phosphate isomerase [Parasteatoda tepidariorum]
5227		5227	5227	ctl	XP_015911243.1	151.754	uncharacterized protein LOC107442241 [Parasteatoda tepidariorum]
		5230	5230	ctl	XP_015904688.1	94.7449	DNA polymerase epsilon catalytic subunit A-like [Parasteatoda tepidariorum]
5231	5231		5231	paralogs	XP_015907870.1	118.242	catenin alpha [Parasteatoda tepidariorum]
5238		5238	5238	ctl	XP_015923931.1	113.62	BTB/POZ domain-containing protein 3-like [Parasteatoda tepidariorum]
5247			5247	paralogs	XP_021003328.1	128.642	2-oxoglutarate dehydrogenase, mitochondrial-like [Parasteatoda tepidariorum]
	5248		5248	same @ 5247	XP_021003328.1	110.923	2-oxoglutarate dehydrogenase, mitochondrial-like [Parasteatoda tepidariorum]
5249	5249		5249	same @ 5247	XP_021003328.1	93.5893	2-oxoglutarate dehydrogenase, mitochondrial-like [Parasteatoda tepidariorum]
5251	5251		5251	paralogs	XP_015929998.1	78.1814	protein argonaute-2-like isoform X2 [Parasteatoda tepidariorum]
5265		5265	5265	ctl	XP_022249514.1	112.079	uncharacterized protein LOC106465477 [Limulus polyphemus]
			5266	ctl	XP_015912849.1	139.043	myosin heavy chain, muscle isoform X8 [Parasteatoda tepidariorum]
5284		5284	5284	same @ 4205	XP_015910760.1	88.5817	talin-2 [Parasteatoda tepidariorum]
5308			5308	ctl	XP_015922033.1	105.916	Golgi reassembly-stacking protein 2 [Parasteatoda tepidariorum]
5310	5310	5310	5310	ctl	XP_015924118.1	101.679	voltage-dependent L-type calcium channel subunit beta-1-like [Parasteatoda tepidariorum]
5341
5356	5356	5356	5356	ctl	XP_015929012.1	80.1073	exportin-1 [Parasteatoda tepidariorum]
	5357		5357	same @ 5356	XP_015929012.1	92.4337	exportin-1 [Parasteatoda tepidariorum]
5371	5371	5371	5371	ctl	XP_015909628.1	122.865	mRNA export factor [Parasteatoda tepidariorum]
			5384	paralogs	XP_021000876.1	78.1814	uncharacterized protein LOC107442702 isoform X7 [Parasteatoda tepidariorum]
5387			5387	paralogs	XP_015913582.1	63.929	glycogen phosphorylase [Parasteatoda tepidariorum]
5394	5394	5394	5394	ctl	XP_020999903.1	126.331	sorting nexin-27 [Parasteatoda tepidariorum]
		5395	5395	same @ 5394	XP_020999903.1	130.568	sorting nexin-27 [Parasteatoda tepidariorum]
5402
5403			5403	ctl; same @ 1552	XP_015916018.2	147.902	striatin-interacting protein 1 homolog [Parasteatoda tepidariorum]
5409		5409	5409	ctl	XP_015918908.1	122.479	ras-related protein Rab-30-like [Parasteatoda tepidariorum]
		5419			XP_021000122.1	100.523	E3 ubiquitin-protein ligase MIB2 [Parasteatoda tepidariorum]
5420
5422	5422		5422	ctl	XP_015931261.1	98.5969	asparagine--tRNA ligase, cytoplasmic [Parasteatoda tepidariorum]
5432			5432	paralogs	XP_021002678.1	66.2402	actin-binding LIM protein 2 [Parasteatoda tepidariorum]
	5439	5439			XP_015912568.1	107.071	NACHT domain- and WD repeat-containing protein 1-like isoform X1 [Parasteatoda tepidariorum]
	5468	5468	5468	ctl	XP_021003689.1	164.851	E3 ubiquitin-protein ligase CBL-B-A-like [Parasteatoda tepidariorum]
5471	5471		5471	ctl	XP_015923514.1	123.25	jmjC domain-containing histone demethylation protein 1-like isoform X3 [Parasteatoda tepidariorum]
5472			5472	ctl	XP_015919134.1	108.612	derlin-2 [Parasteatoda tepidariorum]
		5473			XP_015904315.1	63.929	CAS1 domain-containing protein 1 [Parasteatoda tepidariorum]
5489	5489	5489	5489	ctl	XP_015924111.1	171.785	60S ribosomal protein L3 [Parasteatoda tepidariorum]
5507		5507	5507	ctl	XP_015912369.2	132.88	DEP domain-containing protein 5 [Parasteatoda tepidariorum]
5526		5526	5526	ctl	XP_021001404.1	94.7449	secretin receptor isoform X1 [Parasteatoda tepidariorum]
5532	5532
5535		5535	5535	ctl	XP_015928652.1	184.496	40S ribosomal protein S8 [Parasteatoda tepidariorum]
5544			5544	paralogs	XP_015911780.1	75.8702	polyadenylate-binding protein 4-like isoform X1 [Parasteatoda tepidariorum]
5545	5545	5545	5545	ctl	XP_015928646.1	138.272	dihydrolipoyllysine-residue acetyltransferase component of pyruvate dehydrogenase complex, mitochondrial-like isoform X1 [Parasteatoda tepidariorum]
5546
5555
5557	5557	5557	5557	same @ 5558	XP_015924758.1	117.087	exportin-7 isoform X1 [Parasteatoda tepidariorum]
5558		5558	5558	ctl	XP_015924758.1	114.005	exportin-7 isoform X1 [Parasteatoda tepidariorum]
5559	5559		5559	same @ 5558; paralogs	XP_002434225.1	64.6994	Exportin-7-A, putative, partial [Ixodes scapularis]
5572	5572
5578		5578	5578	ctl	XP_021001564.1	138.272	unconventional myosin-Ia-like [Parasteatoda tepidariorum]
	5581	5581	5581	ctl	XP_015912168.1	102.064	F-BAR domain only protein 2 isoform X1 [Parasteatoda tepidariorum]
5582	5582		5582	same @ 5583	XP_021004384.1	154.836	coatomer subunit alpha-like [Parasteatoda tepidariorum]
5583	5583	5583	5583	ctl	XP_021004384.1	176.407	coatomer subunit alpha-like [Parasteatoda tepidariorum]
5584	5584	5584	5584	same @ 5583	XP_021004384.1	126.331	coatomer subunit alpha-like [Parasteatoda tepidariorum]
5585		5585		not in matrix; same @ 5583	XP_021004384.1	96.6709	coatomer subunit alpha-like [Parasteatoda tepidariorum]
5586	5586	5586	5586	same @ 5583	XP_015908549.2	127.872	coatomer subunit alpha-like [Parasteatoda tepidariorum]
		5587		not in matrix; same @ 5583	XP_021004384.1	98.5969	coatomer subunit alpha-like [Parasteatoda tepidariorum]
5588	5589	5589	5588	ctl	XP_021003764.1	128.642	splicing factor 3B subunit 2-like isoform X1 [Parasteatoda tepidariorum]
5589	5590	5590	5589	same @ 4861	XP_015913004.1	119.783	chromodomain-helicase-DNA-binding protein Mi-2 homolog isoform X1 [Parasteatoda tepidariorum]
5590			5590	same @ 5591	XP_015930014.1	127.872	tyrosine-protein phosphatase non-receptor type 11 isoform X1 [Parasteatoda tepidariorum]
	5591	5591	5591	ctl	XP_015930014.1	149.828	tyrosine-protein phosphatase non-receptor type 11 isoform X1 [Parasteatoda tepidariorum]
5592
5593	5593	5593	5593	paralogs; same @ 5591	XP_015930014.1	93.5893	tyrosine-protein phosphatase non-receptor type 11 isoform X1 [Parasteatoda tepidariorum]
		5612			XP_021001526.1	108.227	palmitoyltransferase ZDHHC18-like [Parasteatoda tepidariorum]
5627			5627	paralogs	XP_015911817.1	84.7297	protein kinase C and casein kinase substrate in neurons protein 2 isoform X3 [Parasteatoda tepidariorum]
5629
5641			5641	same @ 1584	XP_015929997.1	113.62	protein argonaute-2-like isoform X1 [Parasteatoda tepidariorum]
5646	5646	5646	5646	ctl	XP_021002997.1	125.946	40S ribosomal protein S15-like [Parasteatoda tepidariorum]
		5657	5657	ctl	XP_015913033.1	108.997	roquin-1-like [Parasteatoda tepidariorum]
		5677
		5690	5690	paralogs	XP_015923059.1	125.946	F-box/SPRY domain-containing protein 1-like isoform X1 [Parasteatoda tepidariorum]
5691		5691	5691	ctl	XP_015917345.1	98.9821	probable signal peptidase complex subunit 2 [Parasteatoda tepidariorum]
5692		5692	5692	ctl	XP_015927616.1	139.043	DCN1-like protein 1 [Parasteatoda tepidariorum]
5695
5700		5700	5700	ctl	XP_015909466.1	103.99	cyclin-Y-like protein 1 [Parasteatoda tepidariorum]
5710		5710	5710	ctl	XP_015910626.1	109.768	casein kinase II subunit beta [Parasteatoda tepidariorum]
		5722
5723	5723
5724			5724	ctl	XP_015917831.1	120.553	mitotic checkpoint protein BUB3 [Parasteatoda tepidariorum]
	5725	5725	5725	ctl	XP_015907893.1	150.984	transmembrane emp24 domain-containing protein eca-like [Parasteatoda tepidariorum]
		5762	5762	ctl	XP_015910050.1	108.997	piezo-type mechanosensitive ion channel component-like [Parasteatoda tepidariorum]
	5770	5770			XP_015919225.1	90.5077	phosphatidate phosphatase LPIN3 isoform X1 [Parasteatoda tepidariorum]
5774	5774	5774	5774	ctl	XP_015908823.1	92.4337	transmembrane 9 superfamily member 3 [Parasteatoda tepidariorum]
5785	5785	5785	5785	ctl	XP_021004607.1	114.775	tyrosine-protein kinase SYK-like [Parasteatoda tepidariorum]
			5787	paralogs	XP_015922717.1	64.6994	ephrin type-B receptor 1-B isoform X1 [Parasteatoda tepidariorum]
5789			5789	paralogs	XP_021002343.1	150.599	spectrin beta chain [Parasteatoda tepidariorum]
5792	5792
5810
5813
	5815		5815	paralogs	XP_015916075.2	141.739	V-type proton ATPase 116 kDa subunit a isoform X1 [Parasteatoda tepidariorum]
5817	5817	5817	5817	ctl	XP_015923601.2	88.9669	mucin-17-like [Parasteatoda tepidariorum]
5822		5822	5822	ctl	XP_015920607.1	97.8265	splicing factor U2AF 26 kDa subunit-like [Parasteatoda tepidariorum]
5826			5826	ctl	XP_015907621.1	147.902	pituitary homeobox x isoform X1 [Parasteatoda tepidariorum]
5845	5845		5845	ctl	XP_015905673.1	80.1073	ubiquitin domain-containing protein UBFD1 [Parasteatoda tepidariorum]
	5850
5866		5866	5866	ctl	XP_021000762.1	88.5817	inositol monophosphatase 1 [Parasteatoda tepidariorum]
5870		5870	5870	ctl	XP_015929815.1	77.7962	5-oxoprolinase [Parasteatoda tepidariorum]
		5895	5895	ctl	XP_015926243.1	127.872	multiple PDZ domain protein-like [Parasteatoda tepidariorum]
5896	5896		5896	ctl	XP_015923022.1	80.1073	protein Red [Parasteatoda tepidariorum]
685	399	514	698	Total No. Loci

## Sheet: Hits to Parasteotoda
Name	Notes (yellow = duplicate locus)	Accession	Bitscore	Local Database - Description
29	paralogs	XP_021001466.1	105.916	SH3 domain-containing RING finger protein 3 [Parasteatoda tepidariorum]
44	ctl	XP_015928646.1	49.2914	dihydrolipoyllysine-residue acetyltransferase component of pyruvate dehydrogenase complex, mitochondrial-like isoform X1 [Parasteatoda tepidariorum]
44	ctl	XP_015926187.1	102.449	dihydrolipoyllysine-residue succinyltransferase component of 2-oxoglutarate dehydrogenase complex, mitochondrial [Parasteatoda tepidariorum]
47	ctl	XP_021002015.1	107.071	small G protein signaling modulator 3 homolog [Parasteatoda tepidariorum]
67	ctl	XP_015930612.1	68.5514	AP-2 complex subunit alpha-2-like [Parasteatoda tepidariorum]
78	paralogs	XP_020999916.1	65.0846	muscle calcium channel subunit alpha-1 [Parasteatoda tepidariorum]
78	paralogs	XP_021004541.1	65.855	muscle calcium channel subunit alpha-1-like [Parasteatoda tepidariorum]
78	paralogs	XP_015920161.1	95.1301	voltage-dependent calcium channel type A subunit alpha-1 isoform X1 [Parasteatoda tepidariorum]
78	paralogs	XP_021002012.1	93.2041	voltage-dependent calcium channel type A subunit alpha-1-like [Parasteatoda tepidariorum]
81	paralogs	XP_015910896.1	124.79	E3 ubiquitin-protein ligase KCMF1 isoform X1 [Parasteatoda tepidariorum]
101	ctl	XP_021003518.1	108.997	NAD kinase [Parasteatoda tepidariorum]
127	ctl	XP_015907833.1	89.7373	SWI/SNF complex subunit SMARCC2-like isoform X1 [Parasteatoda tepidariorum]
128	ctl	XP_015925007.2	125.176	60S ribosomal protein L17, partial [Parasteatoda tepidariorum]
131	ctl	XP_015919811.1	159.073	BTB/POZ domain-containing protein kctd15-like isoform X1 [Parasteatoda tepidariorum]
149	paralogs	XP_015928750.1	118.627	transmembrane protein 184B-like [Parasteatoda tepidariorum]
174	ctl	XP_015926722.2	65.855	CCR4-NOT transcription complex subunit 1-like [Parasteatoda tepidariorum]
200	ctl	XP_015917383.1	85.1149	RING-box protein 2-like [Parasteatoda tepidariorum]
201	ctl	XP_015931113.1	134.42	catalase-like [Parasteatoda tepidariorum]
204	ctl	XP_021004247.1	106.686	coatomer subunit beta [Parasteatoda tepidariorum]
210	ctl	XP_015907390.1	99.3673	chloride intracellular channel exc-4 [Parasteatoda tepidariorum]
217	ctl	XP_015920292.1	153.295	methionine aminopeptidase 2-like [Parasteatoda tepidariorum]
221	ctl	XP_015917274.1	105.916	son of sevenless homolog 2-like isoform X1 [Parasteatoda tepidariorum]
222	same as 221	XP_015917274.1	120.168	son of sevenless homolog 2-like isoform X1 [Parasteatoda tepidariorum]
229	ctl	XP_015913825.1	115.931	protein unc-13 homolog B-like [Parasteatoda tepidariorum]
231	ctl	XP_021003319.1	88.9669	cell division cycle and apoptosis regulator protein 1, partial [Parasteatoda tepidariorum]
235	ctl	XP_015919071.1	132.109	N-acyl-phosphatidylethanolamine-hydrolyzing phospholipase D [Parasteatoda tepidariorum]
251	ctl	XP_015918259.1	88.9669	cullin-1 isoform X1 [Parasteatoda tepidariorum]
251	ctl	XP_015918950.1	62.3882	cullin-2-like isoform X1 [Parasteatoda tepidariorum]
251	ctl	XP_021003946.1	57.3806	cullin-3-A-like [Parasteatoda tepidariorum]
266	ctl	XP_021002221.1	135.576	E3 ubiquitin-protein ligase HERC2 [Parasteatoda tepidariorum]
276	ctl	XP_021004062.1	100.138	malignant T-cell-amplified sequence 1 [Parasteatoda tepidariorum]
279	paralogs	XP_015931258.2	109.383	LOW QUALITY PROTEIN: sodium channel protein para [Parasteatoda tepidariorum]
279	paralogs	XP_015927082.1	112.464	sodium channel protein para-like [Parasteatoda tepidariorum]
283	ctl	XP_015910230.1	107.457	SWI/SNF-related matrix-associated actin-dependent regulator of chromatin subfamily B member 1-A-like isoform X2 [Parasteatoda tepidariorum]
296	paralogs	XP_021000639.1	178.718	NACHT and WD repeat domain-containing protein 2 [Parasteatoda tepidariorum]
302	ctl	XP_015926308.1	164.851	uncharacterized protein LOC107453849 [Parasteatoda tepidariorum]
314	ctl	XP_015926793.1	147.517	pumilio homolog 2 isoform X1 [Parasteatoda tepidariorum]
315	same as 314	XP_015926793.1	98.9821	pumilio homolog 2 isoform X1 [Parasteatoda tepidariorum]
330	ctl	XP_015908739.1	66.2402	YEATS domain-containing protein 4-like [Parasteatoda tepidariorum]
334	ctl	XP_015910862.1	121.324	cleft lip and palate transmembrane protein 1 homolog [Parasteatoda tepidariorum]
335	ctl	XP_015905360.1	108.997	pleiotropic regulator 1-like [Parasteatoda tepidariorum]
343	ctl	XP_021004059.1	115.161	probable ubiquitin carboxyl-terminal hydrolase FAF-X [Parasteatoda tepidariorum]
353	ctl	XP_015924999.1	114.005	calcium-binding mitochondrial carrier protein SCaMC-2 [Parasteatoda tepidariorum]
360	ctl	XP_015925023.2	96.6709	ubiquitin carboxyl-terminal hydrolase 47 isoform X2 [Parasteatoda tepidariorum]
361	paralogs	XP_015921958.1	75.8702	ATP-dependent RNA helicase dbp2 [Parasteatoda tepidariorum]
361	paralogs	XP_015918000.1	159.458	ATP-dependent RNA helicase DDX3Y isoform X2 [Parasteatoda tepidariorum]
361	paralogs	XP_021004490.1	83.5741	probable ATP-dependent RNA helicase DDX4 [Parasteatoda tepidariorum]
361	paralogs	XP_015908394.1	67.0106	probable ATP-dependent RNA helicase DDX5 [Parasteatoda tepidariorum]
361	paralogs	XP_015930968.1	160.614	putative ATP-dependent RNA helicase an3 [Parasteatoda tepidariorum]
364	paralogs	XP_015907590.1	107.457	CTP synthase 1 isoform X3 [Parasteatoda tepidariorum]
368	same as 369	XP_015929320.1	158.303	probable ATP-dependent RNA helicase DDX46 isoform X1 [Parasteatoda tepidariorum]
369	ctl	XP_015929320.1	98.5969	probable ATP-dependent RNA helicase DDX46 isoform X1 [Parasteatoda tepidariorum]
370	ctl	XP_015910135.1	106.301	glycogen synthase kinase-3 beta [Parasteatoda tepidariorum]
370	ctl	XP_015912550.1	116.316	glycogen synthase kinase-3 beta [Parasteatoda tepidariorum]
382	same as 383	XP_015909114.1	165.622	E3 ubiquitin-protein ligase MYCBP2 [Parasteatoda tepidariorum]
383	ctl	XP_015909114.1	114.39	E3 ubiquitin-protein ligase MYCBP2 [Parasteatoda tepidariorum]
384	same as 383	XP_015909114.1	95.1301	E3 ubiquitin-protein ligase MYCBP2 [Parasteatoda tepidariorum]
394	ctl	XP_021000601.1	83.5741	signal-induced proliferation-associated 1-like protein 1 [Parasteatoda tepidariorum]
422	ctl	XP_015913768.2	137.502	phosphoenolpyruvate carboxykinase, cytosolic [GTP]-like [Parasteatoda tepidariorum]
437	ctl	XP_015922423.1	117.857	uracil phosphoribosyltransferase homolog [Parasteatoda tepidariorum]
449	same as 450	XP_015916319.1	89.7373	eukaryotic translation initiation factor 1 [Parasteatoda tepidariorum]
450	ctl	XP_015916319.1	95.5153	eukaryotic translation initiation factor 1 [Parasteatoda tepidariorum]
459	ctl	XP_021004591.1	121.324	formin-like protein CG32138 [Parasteatoda tepidariorum]
463	paralogs	XP_015905833.1	77.0258	B-box type zinc finger protein ncl-1-like [Parasteatoda tepidariorum]
463	paralogs	XP_015915797.1	79.337	brain tumor protein [Parasteatoda tepidariorum]
463	paralogs	XP_015910069.1	175.252	brain tumor protein-like [Parasteatoda tepidariorum]
471	same as 472	XP_015926421.1	113.235	brefeldin A-inhibited guanine nucleotide-exchange protein 2 [Parasteatoda tepidariorum]
472	ctl	XP_015926421.1	105.531	brefeldin A-inhibited guanine nucleotide-exchange protein 2 [Parasteatoda tepidariorum]
477	ctl	XP_015922609.1	83.5741	cAMP-dependent protein kinase regulatory subunit isoform X1 [Parasteatoda tepidariorum]
482	ctl	XP_021002880.1	98.2117	uncharacterized protein LOC107440639 [Parasteatoda tepidariorum]
484	ctl	XP_015912142.1	66.6254	E3 ubiquitin-protein ligase RNF19B isoform X1 [Parasteatoda tepidariorum]
492	ctl	XP_021003691.1	137.887	ryanodine receptor [Parasteatoda tepidariorum]
503	ctl	XP_015927341.1	68.9366	cactin [Parasteatoda tepidariorum]
517	ctl	XP_021000792.1	89.3521	eukaryotic translation initiation factor 3 subunit D [Parasteatoda tepidariorum]
527	ctl	XP_015917281.1	103.219	RNA-binding protein 42 isoform X1 [Parasteatoda tepidariorum]
538	same as 3364	XP_015905153.1	103.605	YTH domain-containing family protein 3-like [Parasteatoda tepidariorum]
541	ctl	XP_015905005.1	103.605	4-hydroxyphenylpyruvate dioxygenase [Parasteatoda tepidariorum]
549	paralogs	XP_021001073.1	96.6709	regulating synaptic membrane exocytosis protein 1-like isoform X1 [Parasteatoda tepidariorum]
549	paralogs	XP_015920376.1	76.2554	regulating synaptic membrane exocytosis protein 2 isoform X1 [Parasteatoda tepidariorum]
559	paralogs	XP_021002627.1	125.561	DNA-directed RNA polymerase I subunit RPA1-like [Parasteatoda tepidariorum]
559	paralogs	XP_015903993.1	68.1662	DNA-directed RNA polymerase III subunit RPC1-like [Parasteatoda tepidariorum]
573	ctl	XP_015928118.1	184.496	DNA topoisomerase 2-alpha [Parasteatoda tepidariorum]
590	ctl	XP_015927848.1	127.872	myosin-VIIa isoform X1 [Parasteatoda tepidariorum]
594	paralogs	XP_015919278.1	136.732	AP-1 complex subunit gamma-1 [Parasteatoda tepidariorum]
595	paralogs	XP_021002343.1	120.939	spectrin beta chain [Parasteatoda tepidariorum]
595	paralogs	XP_021003038.1	125.946	spectrin beta chain, partial [Parasteatoda tepidariorum]
597	paralogs	XP_021002343.1	113.235	spectrin beta chain [Parasteatoda tepidariorum]
597	paralogs	XP_015930581.2	83.5741	spectrin beta chain-like, partial [Parasteatoda tepidariorum]
612	paralogs	XP_021004248.1	92.8189	WD repeat-containing protein 47 [Parasteatoda tepidariorum]
612	paralogs	XP_021001249.1	115.161	WD repeat-containing protein 47-like [Parasteatoda tepidariorum]
628	ctl	XP_015922668.1	92.8189	ATP synthase subunit alpha, mitochondrial isoform X1 [Parasteatoda tepidariorum]
629	ctl	XP_015925068.1	72.0182	leucine-rich repeat serine/threonine-protein kinase 1 isoform X1 [Parasteatoda tepidariorum]
641	ctl	XP_015903565.1	147.902	protein BCL9 homolog [Parasteatoda tepidariorum]
666	ctl	XP_015918534.1	83.9593	60S ribosomal protein L23 [Parasteatoda tepidariorum]
681	paralogs	XP_015907174.1	64.3142	uncharacterized protein LOC107439184 isoform X1 [Parasteatoda tepidariorum]
682	same as 687	XP_021003106.1	76.2554	transformation/transcription domain-associated protein [Parasteatoda tepidariorum]
686	same as 687	XP_021003106.1	90.1225	transformation/transcription domain-associated protein [Parasteatoda tepidariorum]
687	ctl	XP_021003106.1	110.153	transformation/transcription domain-associated protein [Parasteatoda tepidariorum]
689	same as 687	XP_021003106.1	111.694	transformation/transcription domain-associated protein [Parasteatoda tepidariorum]
694	ctl	XP_015930503.1	110.153	luc7-like protein 3 [Parasteatoda tepidariorum]
747	ctl	XP_015910563.1	177.563	S-phase kinase-associated protein 1 [Parasteatoda tepidariorum]
750	ctl	XP_015919058.1	124.405	striatin-3 isoform X1 [Parasteatoda tepidariorum]
752	ctl	XP_015911082.1	82.8037	GTP cyclohydrolase 1 isoform X1 [Parasteatoda tepidariorum]
753	paralogs	XP_015904820.1	137.887	AP-1 complex subunit mu-1 isoform X3 [Parasteatoda tepidariorum]
753	paralogs	XP_015919889.1	229.18	AP-2 complex subunit mu [Parasteatoda tepidariorum]
753	paralogs	XP_015919896.1	90.1225	AP-3 complex subunit mu-2 [Parasteatoda tepidariorum]
757	ctl	XP_015930029.2	79.7221	dedicator of cytokinesis protein 7-like [Parasteatoda tepidariorum]
761	paralogs	XP_021003801.1	67.0106	5-hydroxytryptamine receptor 2A-like [Parasteatoda tepidariorum]
761	paralogs	XP_015905615.1	65.0846	beta-2 adrenergic receptor [Parasteatoda tepidariorum]
761	paralogs	XP_015927542.1	64.6994	dopamine receptor 1 [Parasteatoda tepidariorum]
761	paralogs	XP_015925366.1	73.559	histamine H1 receptor-like [Parasteatoda tepidariorum]
761	paralogs	XP_015909634.1	84.3445	muscarinic acetylcholine receptor DM1-like [Parasteatoda tepidariorum]
761	paralogs	XP_015911723.1	76.6406	muscarinic acetylcholine receptor M1-like [Parasteatoda tepidariorum]
761	paralogs	XP_015931227.1	205.682	muscarinic acetylcholine receptor M2-like [Parasteatoda tepidariorum]
763	ctl	XP_015913713.1	82.0333	40S ribosomal protein S5 [Parasteatoda tepidariorum]
772	ctl	XP_015917471.1	107.457	E3 ubiquitin-protein ligase UBR3 isoform X1 [Parasteatoda tepidariorum]
774	ctl	XP_015909199.1	83.1889	T-complex protein 1 subunit zeta [Parasteatoda tepidariorum]
791	same as 792	XP_015920095.1	97.0561	acetyl-CoA carboxylase isoform X8 [Parasteatoda tepidariorum]
792	ctl	XP_015920086.1	181.8	acetyl-CoA carboxylase isoform X1 [Parasteatoda tepidariorum]
793	ctl	XP_015920227.1	98.9821	RNA-binding protein Nova-1 isoform X1 [Parasteatoda tepidariorum]
793	ctl	XP_015917970.1	91.6633	RNA-binding protein Nova-1-like [Parasteatoda tepidariorum]
794	ctl	XP_021001432.1	98.5969	guanine nucleotide-binding protein G(I)/G(S)/G(T) subunit beta-1 [Parasteatoda tepidariorum]
794	ctl	XP_015906972.1	56.225	guanine nucleotide-binding protein subunit beta-5 [Parasteatoda tepidariorum]
839	paralogs	XP_015903637.1	134.42	plasma membrane calcium-transporting ATPase 1 isoform X7 [Parasteatoda tepidariorum]
839	paralogs	XP_015905743.1	129.798	plasma membrane calcium-transporting ATPase 2 isoform X4 [Parasteatoda tepidariorum]
854	ctl	XP_015924419.1	142.124	WD repeat-containing protein 7 [Parasteatoda tepidariorum]
856	ctl	XP_015913707.1	130.954	pyruvate carboxylase, mitochondrial [Parasteatoda tepidariorum]
857	same as 856	XP_015913707.1	119.013	pyruvate carboxylase, mitochondrial [Parasteatoda tepidariorum]
887	ctl	XP_015913965.1	125.176	nuclear export mediator factor NEMF-like [Parasteatoda tepidariorum]
890	ctl	XP_015914685.1	81.6481	glycogen debranching enzyme [Parasteatoda tepidariorum]
916	paralogs	XP_015931104.1	94.3597	inhibitor of growth protein 4-like [Parasteatoda tepidariorum]
926	ctl	XP_015930887.2	112.849	cGMP-inhibited 3',5'-cyclic phosphodiesterase A-like [Parasteatoda tepidariorum]
926	ctl	XP_015904146.1	122.479	cGMP-inhibited 3',5'-cyclic phosphodiesterase A-like isoform X1 [Parasteatoda tepidariorum]
939	ctl	XP_021000242.1	92.4337	enhancer of polycomb homolog 1-like [Parasteatoda tepidariorum]
945	same as 3834	XP_015903448.1	125.561	eukaryotic peptide chain release factor subunit 1 [Parasteatoda tepidariorum]
953	ctl	XP_015927001.1	75.485	glucose-6-phosphatase 2 isoform X1 [Parasteatoda tepidariorum]
953	ctl	XP_015914975.1	79.7221	glucose-6-phosphatase-like [Parasteatoda tepidariorum]
971	ctl	XP_015920065.1	120.939	alpha-mannosidase 2C1 [Parasteatoda tepidariorum]
980	ctl	XP_015921954.1	111.309	general receptor for phosphoinositides 1-associated scaffold protein-like isoform X1 [Parasteatoda tepidariorum]
986	ctl	XP_015921599.1	76.6406	tRNA-dihydrouridine(47) synthase [NAD(P)(+)]-like [Parasteatoda tepidariorum]
1012	ctl	XP_021001548.1	73.1738	cell division cycle protein 20 homolog [Parasteatoda tepidariorum]
1012	ctl	XP_015917764.1	150.984	fizzy-related protein homolog [Parasteatoda tepidariorum]
1018	ctl	XP_015912921.1	67.0106	gastrula zinc finger protein XlCGF71.1 [Parasteatoda tepidariorum]
1018	ctl	XP_015926352.1	66.6254	protein krueppel [Parasteatoda tepidariorum]
1018	ctl	XP_015922850.1	70.8626	zinc finger protein 271 [Parasteatoda tepidariorum]
1018	ctl	XP_015927579.1	69.707	zinc finger protein 271-like [Parasteatoda tepidariorum]
1018	ctl	XP_021003547.1	68.1662	zinc finger protein 271-like isoform X1 [Parasteatoda tepidariorum]
1018	ctl	XP_021003011.1	65.4698	zinc finger protein 271-like, partial [Parasteatoda tepidariorum]
1018	ctl	XP_021002081.1	125.946	zinc finger protein 672 [Parasteatoda tepidariorum]
1018	ctl	XP_021004358.1	68.5514	zinc finger protein 850-like isoform X1 [Parasteatoda tepidariorum]
1018	ctl	XP_015922835.1	73.559	zinc finger protein OZF-like [Parasteatoda tepidariorum]
1019	paralogs	XP_015909520.2	65.4698	dual specificity protein kinase CLK2-like isoform X3 [Parasteatoda tepidariorum]
1019	paralogs	XP_015917191.1	187.963	dual specificity tyrosine-phosphorylation-regulated kinase 1A-like [Parasteatoda tepidariorum]
1019	paralogs	XP_015903388.1	194.897	dual specificity tyrosine-phosphorylation-regulated kinase 1B isoform X1 [Parasteatoda tepidariorum]
1019	paralogs	XP_015928681.1	103.99	dual specificity tyrosine-phosphorylation-regulated kinase 2-like [Parasteatoda tepidariorum]
1019	paralogs	XP_015931169.1	104.375	dual specificity tyrosine-phosphorylation-regulated kinase 2-like [Parasteatoda tepidariorum]
1019	paralogs	XP_021000107.1	102.449	dual specificity tyrosine-phosphorylation-regulated kinase 4-like [Parasteatoda tepidariorum]
1019	paralogs	XP_021003184.1	91.2781	dual specificity tyrosine-phosphorylation-regulated kinase 4-like [Parasteatoda tepidariorum]
1019	paralogs	XP_015929843.1	82.8037	homeodomain-interacting protein kinase 2 [Parasteatoda tepidariorum]
1019	paralogs	XP_015913641.1	81.2629	homeodomain-interacting protein kinase 2 isoform X1 [Parasteatoda tepidariorum]
1019	paralogs	XP_015910892.1	65.0846	serine/threonine-protein kinase PRP4 homolog [Parasteatoda tepidariorum]
1048	ctl	XP_021004649.1	28.1054	elongation factor G, mitochondrial-like [Parasteatoda tepidariorum]
1055	ctl	XP_015910558.1	80.4925	importin subunit beta-1-like [Parasteatoda tepidariorum]
1061	ctl	XP_015914861.1	125.946	signal recognition particle receptor subunit alpha isoform X1 [Parasteatoda tepidariorum]
1091	ctl	XP_015917437.1	105.916	lysine--tRNA ligase [Parasteatoda tepidariorum]
1099	paralogs	XP_015909486.1	78.9518	merlin-like [Parasteatoda tepidariorum]
1099	same as 1100, paralogs	XP_015929578.1	106.686	moesin/ezrin/radixin homolog 1 [Parasteatoda tepidariorum]
1100	ctl	XP_015929578.1	108.997	moesin/ezrin/radixin homolog 1 [Parasteatoda tepidariorum]
1108	ctl	XP_015915059.1	260.381	WD repeat-containing protein 20 [Parasteatoda tepidariorum]
1121	ctl	XP_015903142.1	174.481	eukaryotic translation initiation factor 4 gamma 2-like [Parasteatoda tepidariorum]
1121	ctl	XP_021002778.1	58.5362	eukaryotic translation initiation factor 4 gamma 3 [Parasteatoda tepidariorum]
1121	ctl	XP_021003838.1	64.3142	eukaryotic translation initiation factor 4 gamma 3 [Parasteatoda tepidariorum]
1121	ctl	XP_015920777.1	60.8474	eukaryotic translation initiation factor 4 gamma 3-like, partial [Parasteatoda tepidariorum]
1133	ctl	XP_015922325.1	83.5741	mitogen-activated protein kinase kinase kinase 7 [Parasteatoda tepidariorum]
1137	ctl	XP_015910060.1	25.7942	26S proteasome non-ATPase regulatory subunit 14 [Parasteatoda tepidariorum]
1150	ctl	XP_021001121.1	100.523	tubulin gamma-1 chain [Parasteatoda tepidariorum]
1180	paralogs	XP_015912570.1	81.6481	RING finger and SPRY domain-containing protein 1-like [Parasteatoda tepidariorum]
1182	ctl	XP_015923984.1	137.117	protein SET [Parasteatoda tepidariorum]
1197	ctl	XP_015908140.1	112.849	inositol 1,4,5-trisphosphate receptor [Parasteatoda tepidariorum]
1198	same as 1197, 4084	XP_015908140.1	107.071	inositol 1,4,5-trisphosphate receptor [Parasteatoda tepidariorum]
1203	ctl	XP_021002656.1	100.138	mediator of RNA polymerase II transcription subunit 12-like protein [Parasteatoda tepidariorum]
1205	paralogs	XP_015930297.1	65.4698	sodium/potassium-transporting ATPase subunit beta-1-like [Parasteatoda tepidariorum]
1205	paralogs	XP_021002558.1	101.679	sodium/potassium-transporting ATPase subunit beta-2-like [Parasteatoda tepidariorum]
1205	paralogs	XP_015911861.1	152.14	sodium/potassium-transporting ATPase subunit beta-like [Parasteatoda tepidariorum]
1206	ctl	XP_015923066.1	79.337	propionyl-CoA carboxylase alpha chain, mitochondrial [Parasteatoda tepidariorum]
1220	ctl	XP_015929145.1	122.094	NADH dehydrogenase [ubiquinone] iron-sulfur protein 8, mitochondrial-like [Parasteatoda tepidariorum]
1228	ctl	XP_015907029.1	78.9518	cleavage and polyadenylation specificity factor subunit 2 [Parasteatoda tepidariorum]
1238	ctl	XP_015920860.1	103.99	mannose-1-phosphate guanyltransferase beta [Parasteatoda tepidariorum]
1241	ctl	XP_015913982.1	88.5817	60S ribosomal protein L5-A [Parasteatoda tepidariorum]
1245	same as 1246	XP_015914916.1	67.781	protein PRRC2C isoform X1 [Parasteatoda tepidariorum]
1246	ctl	XP_015914916.1	105.916	protein PRRC2C isoform X1 [Parasteatoda tepidariorum]
1247	same as 1246	XP_015914914.1	128.257	protein PRRC2C isoform X1 [Parasteatoda tepidariorum]
1250	same as 1251	XP_015930022.1	105.145	splicing factor 3B subunit 4 [Parasteatoda tepidariorum]
1251	ctl	XP_015930022.1	128.642	splicing factor 3B subunit 4 [Parasteatoda tepidariorum]
1251	ctl	XP_015911136.1	124.405	splicing factor 3B subunit 4-like [Parasteatoda tepidariorum]
1252	same as 1254	XP_015917010.1	125.176	DNA repair and recombination protein RAD54-like [Parasteatoda tepidariorum]
1252	same as 1254	XP_021004196.1	81.6481	DNA repair and recombination protein RAD54B [Parasteatoda tepidariorum]
1252	same as 1254	XP_015913086.2	60.077	transcriptional regulator ATRX homolog [Parasteatoda tepidariorum]
1254	ctl	XP_021001512.1	93.9745	chromatin-remodeling complex ATPase chain Iswi [Parasteatoda tepidariorum]
1254	ctl	XP_021001398.1	93.9745	chromodomain-helicase-DNA-binding protein 1-like [Parasteatoda tepidariorum]
1254	ctl	XP_021002497.1	90.8929	chromodomain-helicase-DNA-binding protein 7 [Parasteatoda tepidariorum]
1254	ctl	XP_015913004.1	94.3597	chromodomain-helicase-DNA-binding protein Mi-2 homolog isoform X1 [Parasteatoda tepidariorum]
1254	ctl	XP_021000692.1	126.331	DNA excision repair protein ERCC-6 [Parasteatoda tepidariorum]
1254	ctl	XP_015915718.2	106.301	DNA excision repair protein ERCC-6-like [Parasteatoda tepidariorum]
1254	ctl	XP_015925521.1	103.605	DNA excision repair protein ERCC-6-like [Parasteatoda tepidariorum]
1254	ctl	XP_015910442.1	97.0561	DNA helicase INO80 isoform X1 [Parasteatoda tepidariorum]
1254	ctl	XP_015917010.1	338.961	DNA repair and recombination protein RAD54-like [Parasteatoda tepidariorum]
1254	ctl	XP_021004196.1	146.362	DNA repair and recombination protein RAD54B [Parasteatoda tepidariorum]
1254	ctl	XP_021002240.1	94.7449	helicase domino isoform X1 [Parasteatoda tepidariorum]
1254	ctl	XP_015918811.2	94.7449	helicase domino isoform X2 [Parasteatoda tepidariorum]
1254	ctl	XP_015913292.1	97.0561	lymphoid-specific helicase-like [Parasteatoda tepidariorum]
1254	ctl	XP_015906861.1	98.5969	probable global transcription activator SNF2L2 [Parasteatoda tepidariorum]
1254	ctl	XP_015918938.1	80.4925	SWI/SNF-related matrix-associated actin-dependent regulator of chromatin subfamily A containing DEAD/H box 1 homolog isoform X1 [Parasteatoda tepidariorum]
1254	ctl	XP_015920850.1	91.2781	TATA-binding protein-associated factor 172-like [Parasteatoda tepidariorum]
1254	ctl	XP_015904649.1	95.1301	transcription termination factor 2-like [Parasteatoda tepidariorum]
1254	ctl	XP_015913086.2	124.405	transcriptional regulator ATRX homolog [Parasteatoda tepidariorum]
1254	ctl	XP_015904971.2	115.931	uncharacterized protein LOC107437471 [Parasteatoda tepidariorum]
1274	ctl	XP_015903481.1	121.324	DCN1-like protein 3 [Parasteatoda tepidariorum]
1306	ctl	XP_021002653.1	77.411	UDP-glucose:glycoprotein glucosyltransferase 1-like [Parasteatoda tepidariorum]
1308	ctl	XP_015923059.1	65.855	F-box/SPRY domain-containing protein 1-like isoform X1 [Parasteatoda tepidariorum]
1308	ctl	XP_015903195.1	162.54	protein gustavus-like [Parasteatoda tepidariorum]
1347	paralogs	XP_015927845.1	91.2781	catenin delta-2 [Parasteatoda tepidariorum]
1368	same as 2596	XP_015914886.1	82.4185	armadillo segment polarity protein-like isoform X1 [Parasteatoda tepidariorum]
1369	same as 2596	XP_015914886.1	95.9005	armadillo segment polarity protein-like isoform X1 [Parasteatoda tepidariorum]
1372	ctl	XP_015918850.1	107.071	probable protein phosphatase 2C T23F11.1 [Parasteatoda tepidariorum]
1382	ctl	XP_015926392.1	115.161	alpha-aminoadipic semialdehyde dehydrogenase-like [Parasteatoda tepidariorum]
1408	ctl	XP_015911333.1	96.2857	proteasome subunit beta type-3-like isoform X1 [Parasteatoda tepidariorum]
1411	ctl	XP_015911178.1	102.449	probable cytosolic iron-sulfur protein assembly protein CIAO1 homolog [Parasteatoda tepidariorum]
1439	paralogs	XP_015927732.1	63.1586	ATP-binding cassette sub-family D member 2 [Parasteatoda tepidariorum]
1439	paralogs	XP_015930768.1	67.781	ATP-binding cassette sub-family D member 3-like [Parasteatoda tepidariorum]
1439	paralogs	XP_021002048.1	59.3066	LOW QUALITY PROTEIN: ATP-binding cassette sub-family D member 3-like [Parasteatoda tepidariorum]
1448	ctl	XP_021000380.1	87.0409	neuropathy target esterase sws [Parasteatoda tepidariorum]
1453	paralogs	XP_015931258.2	47.3654	LOW QUALITY PROTEIN: sodium channel protein para [Parasteatoda tepidariorum]
1453	paralogs	XP_015914101.1	29.6462	sodium channel protein 60E [Parasteatoda tepidariorum]
1453	paralogs	XP_015925585.1	28.1054	sodium channel protein para-like [Parasteatoda tepidariorum]
1453	paralogs	XP_015927082.1	43.5134	sodium channel protein para-like [Parasteatoda tepidariorum]
1469	ctl	XP_015919763.1	164.851	BTB/POZ domain-containing protein 2 [Parasteatoda tepidariorum]
1469	ctl	XP_015907566.1	82.8037	BTB/POZ domain-containing protein 6-B-like [Parasteatoda tepidariorum]
1501	ctl	XP_015918441.1	114.775	polyphosphoinositide phosphatase [Parasteatoda tepidariorum]
1507	paralogs	XP_015911050.1	23.483	glutamate receptor ionotropic, kainate 1-like [Parasteatoda tepidariorum]
1507	paralogs	XP_015922166.1	46.9802	glutamate receptor ionotropic, kainate 1-like [Parasteatoda tepidariorum]
1507	paralogs	XP_015922296.1	28.8758	glutamate receptor ionotropic, kainate 2 [Parasteatoda tepidariorum]
1507	paralogs	XP_015923373.1	46.9802	glutamate receptor ionotropic, kainate 2 isoform X1 [Parasteatoda tepidariorum]
1507	paralogs	XP_015925654.1	25.409	glutamate receptor ionotropic, kainate 2 isoform X1 [Parasteatoda tepidariorum]
1507	paralogs	XP_015914480.1	25.7942	glutamate receptor ionotropic, kainate 2-like [Parasteatoda tepidariorum]
1547	ctl	XP_015914323.1	153.295	E3 ubiquitin-protein ligase RING2 [Parasteatoda tepidariorum]
1552	same as 5403	XP_015916018.2	135.576	striatin-interacting protein 1 homolog [Parasteatoda tepidariorum]
1559	ctl	XP_015929976.1	64.6994	sorting nexin-3 isoform X1 [Parasteatoda tepidariorum]
1571	paralogs	XP_015919835.1	86.6557	splicing factor U2AF 50 kDa subunit [Parasteatoda tepidariorum]
1582	ctl	XP_015913830.2	105.145	protein unc-13 homolog A-like [Parasteatoda tepidariorum]
1584	paralogs	XP_015929997.1	107.842	protein argonaute-2-like isoform X1 [Parasteatoda tepidariorum]
1585	paralogs	XP_015929997.1	69.707	protein argonaute-2-like isoform X1 [Parasteatoda tepidariorum]
1601	ctl	XP_015928678.1	118.242	DNA-directed RNA polymerase II subunit RPB3 [Parasteatoda tepidariorum]
1602	same as 1601	XP_015928678.1	108.227	DNA-directed RNA polymerase II subunit RPB3 [Parasteatoda tepidariorum]
1605	ctl	XP_021004466.1	164.851	40S ribosomal protein SA [Parasteatoda tepidariorum]
1609	ctl	XP_015922717.1	149.443	ephrin type-B receptor 1-B isoform X1 [Parasteatoda tepidariorum]
1613	paralogs	XP_021001466.1	113.235	SH3 domain-containing RING finger protein 3 [Parasteatoda tepidariorum]
1620	ctl	XP_015930491.1	107.457	eukaryotic peptide chain release factor GTP-binding subunit ERF3A-like [Parasteatoda tepidariorum]
1620	ctl	XP_021001963.1	67.781	HBS1-like protein [Parasteatoda tepidariorum]
1639	ctl	XP_015903334.1	83.1889	ATP-dependent RNA helicase DDX39A-like [Parasteatoda tepidariorum]
1646	same as 1647	XP_015925425.1	128.642	E3 ubiquitin-protein ligase HECTD1 isoform X1 [Parasteatoda tepidariorum]
1647	ctl	XP_015925425.1	125.561	E3 ubiquitin-protein ligase HECTD1 isoform X1 [Parasteatoda tepidariorum]
1654	ctl	XP_021000384.1	97.0561	drebrin-like protein [Parasteatoda tepidariorum]
1654	ctl	XP_015909931.1	67.0106	src substrate protein p85-like isoform X1 [Parasteatoda tepidariorum]
1656	ctl	XP_015908874.1	122.094	poly(U)-binding-splicing factor half pint isoform X2 [Parasteatoda tepidariorum]
1656	ctl	XP_015908873.1	122.094	poly(U)-binding-splicing factor PUF60 isoform X1 [Parasteatoda tepidariorum]
1672	same as 2668	XP_015907384.1	113.62	AP-1 complex subunit beta-1 [Parasteatoda tepidariorum]
1682	ctl	XP_015930832.1	91.6633	pre-mRNA 3' end processing protein WDR33 [Parasteatoda tepidariorum]
1683	same as 1682	XP_015930832.1	107.457	pre-mRNA 3' end processing protein WDR33 [Parasteatoda tepidariorum]
1692	ctl	XP_021004440.1	126.716	phosphatidylinositol 4,5-bisphosphate 3-kinase catalytic subunit alpha isoform-like [Parasteatoda tepidariorum]
1693	same as 1693	XP_021004440.1	108.227	phosphatidylinositol 4,5-bisphosphate 3-kinase catalytic subunit alpha isoform-like [Parasteatoda tepidariorum]
1708	ctl	XP_015907787.1	91.2781	protein transport protein Sec61 subunit alpha [Parasteatoda tepidariorum]
1715	ctl	XP_015908646.1	119.398	protein furry-like [Parasteatoda tepidariorum]
1718	same as 1715	XP_015908646.1	140.969	protein furry-like [Parasteatoda tepidariorum]
1720	same as 1715	XP_015908646.1	232.646	protein furry-like [Parasteatoda tepidariorum]
1721	same as 1715	XP_015908646.1	233.417	protein furry-like [Parasteatoda tepidariorum]
1725	ctl	XP_015923742.1	89.3521	RUS1 family protein C16orf58 homolog [Parasteatoda tepidariorum]
1743	ctl	XP_015924886.1	129.798	polycomb protein SCMH1 isoform X1 [Parasteatoda tepidariorum]
1743	ctl	XP_015925676.1	145.591	polycomb protein SCMH1 isoform X1 [Parasteatoda tepidariorum]
1744	ctl	XP_015924509.2	95.5153	serine/threonine-protein kinase 40 [Parasteatoda tepidariorum]
1753	ctl	XP_015931017.1	130.954	elongation factor 2 [Parasteatoda tepidariorum]
1763	ctl	XP_021001566.1	97.8265	protein transport protein Sec31A-like [Parasteatoda tepidariorum]
1768	paralogs	XP_015918364.1	111.694	adapter molecule Crk [Parasteatoda tepidariorum]
1772	ctl	XP_015920227.1	218.009	RNA-binding protein Nova-1 isoform X1 [Parasteatoda tepidariorum]
1772	ctl	XP_015917970.1	216.083	RNA-binding protein Nova-1-like [Parasteatoda tepidariorum]
1792	paralogs	XP_015914853.1	115.931	uncharacterized protein LOC107445052 [Parasteatoda tepidariorum]
1797	ctl	XP_021004118.1	123.25	ubiquitin carboxyl-terminal hydrolase 34 [Parasteatoda tepidariorum]
1801	ctl	XP_015917789.1	115.161	vesicular inhibitory amino acid transporter-like [Parasteatoda tepidariorum]
1804	ctl	XP_015918872.1	162.925	helicase ARIP4 [Parasteatoda tepidariorum]
1804	ctl	XP_015913086.2	88.5817	transcriptional regulator ATRX homolog [Parasteatoda tepidariorum]
1804	ctl	XP_015904971.2	162.925	uncharacterized protein LOC107437471 [Parasteatoda tepidariorum]
1812	ctl	XP_015906134.1	337.421	ankyrin-3 [Parasteatoda tepidariorum]
1824	ctl	XP_015913259.1	100.908	threonine--tRNA ligase, cytoplasmic isoform X1 [Parasteatoda tepidariorum]
1848	ctl	XP_021003702.1	78.1814	activating signal cointegrator 1 complex subunit 3 [Parasteatoda tepidariorum]
1848	ctl	XP_015924847.1	164.851	U5 small nuclear ribonucleoprotein 200 kDa helicase-like [Parasteatoda tepidariorum]
1849	same as 1848, 2480	XP_021003702.1	67.781	activating signal cointegrator 1 complex subunit 3 [Parasteatoda tepidariorum]
1849	same as 1848, 2480	XP_015924847.1	198.749	U5 small nuclear ribonucleoprotein 200 kDa helicase-like [Parasteatoda tepidariorum]
1850	ctl	XP_015924847.1	115.931	U5 small nuclear ribonucleoprotein 200 kDa helicase-like [Parasteatoda tepidariorum]
1855	ctl	XP_015906119.1	95.5153	kalirin isoform X2 [Parasteatoda tepidariorum]
1855	ctl	XP_015906118.1	95.5153	triple functional domain protein isoform X1 [Parasteatoda tepidariorum]
1858	ctl	XP_015930601.1	75.485	MOB kinase activator 2 isoform X1 [Parasteatoda tepidariorum]
1858	ctl	XP_015930606.1	75.485	MOB kinase activator-like 2 isoform X5 [Parasteatoda tepidariorum]
1862	ctl	XP_015917573.1	72.4034	PHD finger protein 14-like [Parasteatoda tepidariorum]
1873	ctl	XP_021001554.1	116.701	phosphatidylinositol 3-kinase catalytic subunit type 3-like [Parasteatoda tepidariorum]
1890	ctl	XP_021000086.1	119.783	small nuclear ribonucleoprotein Sm D2 [Parasteatoda tepidariorum]
1891	ctl	XP_015920217.1	92.0485	transmembrane protein adipocyte-associated 1-like isoform X1 [Parasteatoda tepidariorum]
1892	ctl	XP_015930548.1	105.531	ubiquitin-conjugating enzyme E2 variant 2 isoform X1 [Parasteatoda tepidariorum]
1901	paralogs	XP_015907693.1	130.183	calcium uniporter protein, mitochondrial [Parasteatoda tepidariorum]
1901	paralogs	XP_021001791.1	130.568	calcium uniporter protein, mitochondrial-like [Parasteatoda tepidariorum]
1902	ctl	XP_015907014.1	150.599	Golgi-specific brefeldin A-resistance guanine nucleotide exchange factor 1 isoform X1 [Parasteatoda tepidariorum]
1919	same as 1920	XP_015929428.1	95.9005	E3 ubiquitin-protein ligase UBR5 isoform X1 [Parasteatoda tepidariorum]
1920	ctl	XP_015929428.1	166.392	E3 ubiquitin-protein ligase UBR5 isoform X1 [Parasteatoda tepidariorum]
1921	same as 1920	XP_015929428.1	127.102	E3 ubiquitin-protein ligase UBR5 isoform X1 [Parasteatoda tepidariorum]
1923	ctl	XP_015905765.1	77.411	alpha-actinin isoform X1 [Parasteatoda tepidariorum]
1923	ctl	XP_021000807.1	187.578	spectrin alpha chain [Parasteatoda tepidariorum]
1936	ctl	XP_015916258.1	98.9821	dynamin-1-like protein [Parasteatoda tepidariorum]
1960	ctl	XP_015930437.1	80.8777	protein still life, isoform SIF type 1 isoform X1 [Parasteatoda tepidariorum]
1960	ctl	XP_015917219.1	82.4185	protein still life, isoform SIF type 1-like isoform X1 [Parasteatoda tepidariorum]
1965	paralogs	XP_021004082.1	56.9954	coiled-coil domain-containing protein AGAP005037 isoform X1 [Parasteatoda tepidariorum]
1971	ctl	XP_015914325.1	88.5817	tetratricopeptide repeat protein 30A [Parasteatoda tepidariorum]
1976	ctl	XP_015910673.1	103.219	developmentally-regulated GTP-binding protein 1 [Parasteatoda tepidariorum]
1990	ctl	XP_015921248.1	103.99	5'-AMP-activated protein kinase catalytic subunit alpha-2-like [Parasteatoda tepidariorum]
1990	ctl	XP_021001802.1	80.1073	cGMP-dependent protein kinase 1-like [Parasteatoda tepidariorum]
1990	ctl	XP_015921944.1	79.7221	cyclin-dependent kinase-like 4 isoform X1 [Parasteatoda tepidariorum]
1990	ctl	XP_015905873.1	111.694	MAP/microtubule affinity-regulating kinase 3 isoform X1 [Parasteatoda tepidariorum]
1990	ctl	XP_021001755.1	92.0485	maternal embryonic leucine zipper kinase-like [Parasteatoda tepidariorum]
1990	ctl	XP_021000960.1	78.1814	PAS domain-containing serine/threonine-protein kinase-like [Parasteatoda tepidariorum]
1990	ctl	XP_015925668.1	95.5153	rho-associated protein kinase 2-like isoform X1 [Parasteatoda tepidariorum]
1990	ctl	XP_015911657.1	93.5893	serine/threonine-protein kinase BRSK2 isoform X1 [Parasteatoda tepidariorum]
1990	ctl	XP_015923408.1	92.4337	serine/threonine-protein kinase BRSK2-like isoform X1 [Parasteatoda tepidariorum]
1990	ctl	XP_021002117.1	85.8853	serine/threonine-protein kinase HSL1-like isoform X2 [Parasteatoda tepidariorum]
1990	ctl	XP_015910517.1	218.394	serine/threonine-protein kinase MARK2 [Parasteatoda tepidariorum]
1990	ctl	XP_020999847.1	93.9745	serine/threonine-protein kinase SIK3 [Parasteatoda tepidariorum]
1990	ctl	XP_021002116.1	85.8853	uncharacterized protein LOC107441821 isoform X1 [Parasteatoda tepidariorum]
1998	ctl	XP_015928594.1	121.324	uncharacterized protein LOC107455513 isoform X1 [Parasteatoda tepidariorum]
2002	ctl	XP_015907555.1	97.0561	NAD-dependent protein deacylase sirtuin-5, mitochondrial-like [Parasteatoda tepidariorum]
2004	ctl	XP_020999845.1	117.087	E3 ubiquitin-protein ligase HECW1 [Parasteatoda tepidariorum]
2004	ctl	XP_021001506.1	71.2478	E3 ubiquitin-protein ligase Nedd-4-like [Parasteatoda tepidariorum]
2004	ctl	XP_015912196.1	76.6406	E3 ubiquitin-protein ligase Su(dx)-like [Parasteatoda tepidariorum]
2010	same as 1923, 4027, 4175	XP_021000807.1	119.398	spectrin alpha chain [Parasteatoda tepidariorum]
2028	ctl	XP_015916372.1	141.354	60S ribosomal protein L24 [Parasteatoda tepidariorum]
2037	ctl	XP_015921052.1	95.5153	sarcosine dehydrogenase, mitochondrial-like [Parasteatoda tepidariorum]
2054	paralogs	XP_021003185.1	70.8626	potassium voltage-gated channel subfamily KQT member 1 [Parasteatoda tepidariorum]
2054	paralogs	XP_015917707.1	73.559	potassium voltage-gated channel subfamily KQT member 1 isoform X1 [Parasteatoda tepidariorum]
2058	ctl	XP_015920188.1	160.614	isocitrate dehydrogenase [NAD] subunit beta, mitochondrial-like [Parasteatoda tepidariorum]
2058	ctl	XP_015909429.1	172.94	isocitrate dehydrogenase [NAD] subunit gamma, mitochondrial [Parasteatoda tepidariorum]
2058	ctl	XP_015904046.1	144.821	probable isocitrate dehydrogenase [NAD] subunit alpha, mitochondrial [Parasteatoda tepidariorum]
2058	ctl	XP_015923176.1	244.202	probable isocitrate dehydrogenase [NAD] subunit beta, mitochondrial [Parasteatoda tepidariorum]
2070	ctl	XP_021004600.1	78.9518	diacylglycerol kinase 1-like [Parasteatoda tepidariorum]
2073	ctl	XP_015925728.1	100.908	integrator complex subunit 11 [Parasteatoda tepidariorum]
2079	same as 3428	XP_015909967.1	123.635	neurofibromin-like isoform X1 [Parasteatoda tepidariorum]
2080	same as 3428	XP_015909967.1	219.55	neurofibromin-like isoform X1 [Parasteatoda tepidariorum]
2081	ctl	XP_021003103.1	144.436	POU domain, class 6, transcription factor 1-like [Parasteatoda tepidariorum]
2092	ctl	XP_015906994.2	111.694	xenotropic and polytropic retrovirus receptor 1 homolog [Parasteatoda tepidariorum]
2099	paralogs	XP_015903775.1	65.0846	T-complex protein 1 subunit eta-like [Parasteatoda tepidariorum]
2115	ctl	XP_015928826.1	145.206	tubby-related protein 4-like [Parasteatoda tepidariorum]
2122	ctl	XP_021002956.1	141.354	proliferating cell nuclear antigen-like [Parasteatoda tepidariorum]
2125	ctl	XP_015906953.1	103.99	serine/threonine-protein kinase mTOR [Parasteatoda tepidariorum]
2126	ctl	XP_015928615.1	107.457	alpha-mannosidase 2 isoform X1 [Parasteatoda tepidariorum]
2138	same as 2139	XP_015917574.1	148.673	Golgi phosphoprotein 3 homolog sauron [Parasteatoda tepidariorum]
2139	ctl	XP_015917574.1	189.889	Golgi phosphoprotein 3 homolog sauron [Parasteatoda tepidariorum]
2159	ctl	XP_021000009.1	125.561	histone-lysine N-methyltransferase E(z)-like [Parasteatoda tepidariorum]
2185	ctl	XP_015904658.1	143.665	cytoplasmic dynein 1 heavy chain 1-like, partial [Parasteatoda tepidariorum]
2185	ctl	XP_021002603.1	155.221	dynein heavy chain, cytoplasmic [Parasteatoda tepidariorum]
2186	same as 2185	XP_015904658.1	110.923	cytoplasmic dynein 1 heavy chain 1-like, partial [Parasteatoda tepidariorum]
2186	same as 2185	XP_021002603.1	110.923	dynein heavy chain, cytoplasmic [Parasteatoda tepidariorum]
2187	ctl	XP_021002210.1	65.855	cytoplasmic dynein 2 heavy chain 1-like [Parasteatoda tepidariorum]
2187	ctl	XP_021002603.1	105.916	dynein heavy chain, cytoplasmic [Parasteatoda tepidariorum]
2191	same as 2187	XP_021002603.1	135.576	dynein heavy chain, cytoplasmic [Parasteatoda tepidariorum]
2193	same as 2187	XP_021002603.1	118.627	dynein heavy chain, cytoplasmic [Parasteatoda tepidariorum]
2196	same as 2187	XP_021002603.1	115.546	dynein heavy chain, cytoplasmic [Parasteatoda tepidariorum]
2208	same as 4417	XP_021004185.1	100.523	macoilin-1-like [Parasteatoda tepidariorum]
2216	paralogs	XP_015912788.1	78.5666	phosphatidate cytidylyltransferase, photoreceptor-specific-like isoform X1 [Parasteatoda tepidariorum]
2219	ctl	XP_015928991.1	174.866	cleavage and polyadenylation specificity factor subunit 4 [Parasteatoda tepidariorum]
2227	paralogs	XP_015927820.1	114.775	NADH-ubiquinone oxidoreductase 75 kDa subunit, mitochondrial [Parasteatoda tepidariorum]
2230	paralogs	XP_015929579.2	149.828	probable G-protein coupled receptor CG31760 [Parasteatoda tepidariorum]
2241	ctl	XP_015909627.1	77.0258	uncharacterized protein LOC107441015 [Parasteatoda tepidariorum]
2245	ctl	XP_015919563.1	121.324	vacuolar protein sorting-associated protein 35 isoform X1 [Parasteatoda tepidariorum]
2250	paralogs	XP_015929155.1	164.466	N6-adenosine-methyltransferase subunit METTL3-like [Parasteatoda tepidariorum]
2257	ctl	XP_021003868.1	117.857	glycine dehydrogenase (decarboxylating), mitochondrial-like, partial [Parasteatoda tepidariorum]
2261	ctl	XP_015924790.1	113.62	rho GDP-dissociation inhibitor 2 [Parasteatoda tepidariorum]
2262	ctl	XP_015922590.1	114.775	actin-related protein 2/3 complex subunit 2-like isoform X1 [Parasteatoda tepidariorum]
2280	ctl	XP_015923530.1	139.428	coronin-2B-like [Parasteatoda tepidariorum]
2280	ctl	XP_021003195.1	90.5077	coronin-6-like [Parasteatoda tepidariorum]
2281	ctl	XP_015916553.1	91.2781	sugar phosphate exchanger 3-like isoform X1 [Parasteatoda tepidariorum]
2290	ctl	XP_021002784.1	88.9669	NAD(P) transhydrogenase, mitochondrial-like [Parasteatoda tepidariorum]
2296	ctl	XP_015903626.1	133.65	plasma membrane calcium-transporting ATPase 2 isoform X1 [Parasteatoda tepidariorum]
2303	ctl	XP_015903715.1	77.0258	colorectal mutant cancer protein isoform X1 [Parasteatoda tepidariorum]
2306	paralogs	XP_015931061.1	141.354	PR domain zinc finger protein 1 [Parasteatoda tepidariorum]
2306	paralogs	XP_021002994.1	142.895	PR domain zinc finger protein 1-like [Parasteatoda tepidariorum]
2306	paralogs	XP_015926336.1	66.6254	zinc finger protein 2 homolog [Parasteatoda tepidariorum]
2306	paralogs	XP_021001607.1	67.3958	zinc finger protein 208-like, partial [Parasteatoda tepidariorum]
2306	paralogs	XP_015911820.1	65.4698	zinc finger protein 271 [Parasteatoda tepidariorum]
2306	paralogs	XP_015924378.1	66.6254	zinc finger protein 271-like [Parasteatoda tepidariorum]
2306	paralogs	XP_015928129.1	65.855	zinc finger protein 271-like [Parasteatoda tepidariorum]
2306	paralogs	XP_021002435.1	66.6254	zinc finger protein 271-like [Parasteatoda tepidariorum]
2306	paralogs	XP_015922650.1	65.4698	zinc finger protein 708-like [Parasteatoda tepidariorum]
2306	paralogs	XP_015920200.1	67.781	zinc finger protein 84-like [Parasteatoda tepidariorum]
2306	paralogs	XP_021002691.1	70.0922	zinc finger protein 845 [Parasteatoda tepidariorum]
2314	ctl	XP_021002099.1	125.176	pre-mRNA-processing factor 17-like [Parasteatoda tepidariorum]
2325	ctl	XP_015925990.1	137.502	surfeit locus protein 4 homolog [Parasteatoda tepidariorum]
2347	same as 2354	XP_015919108.1	215.698	pre-mRNA-processing-splicing factor 8 [Parasteatoda tepidariorum]
2354	ctl	XP_015919108.1	148.673	pre-mRNA-processing-splicing factor 8 [Parasteatoda tepidariorum]
2372	same as 2374	XP_020999997.1	101.293	RNA polymerase-associated protein CTR9 homolog [Parasteatoda tepidariorum]
2374	same as 2372	XP_020999997.1	97.4413	RNA polymerase-associated protein CTR9 homolog [Parasteatoda tepidariorum]
2393	same as 2394	XP_015928513.1	74.3294	E3 ubiquitin-protein ligase HUWE1 isoform X6 [Parasteatoda tepidariorum]
2393	same as 2394	XP_021001506.1	81.2629	E3 ubiquitin-protein ligase Nedd-4-like [Parasteatoda tepidariorum]
2393	same as 2394	XP_015912196.1	147.132	E3 ubiquitin-protein ligase Su(dx)-like [Parasteatoda tepidariorum]
2394	ctl	XP_020999845.1	88.5817	E3 ubiquitin-protein ligase HECW1 [Parasteatoda tepidariorum]
2394	ctl	XP_015912196.1	125.561	E3 ubiquitin-protein ligase Su(dx)-like [Parasteatoda tepidariorum]
2396	ctl	XP_015910355.1	119.783	negative elongation factor A [Parasteatoda tepidariorum]
2403	paralogs	XP_021004031.1	81.2629	ras-related protein Rab-1A [Parasteatoda tepidariorum]
2409	ctl	XP_015917615.1	93.5893	protein lin-28 homolog [Parasteatoda tepidariorum]
2409	ctl	XP_021003577.1	96.6709	protein lin-28 homolog isoform X2 [Parasteatoda tepidariorum]
2417	ctl	XP_021001100.1	87.4261	charged multivesicular body protein 1b-like [Parasteatoda tepidariorum]
2423	ctl	XP_021003354.1	109.768	endothelial transcription factor GATA-2-like isoform X1 [Parasteatoda tepidariorum]
2426	ctl	XP_021003748.1	96.2857	WD repeat and FYVE domain-containing protein 3 [Parasteatoda tepidariorum]
2432	ctl	XP_015910892.1	72.7886	serine/threonine-protein kinase PRP4 homolog [Parasteatoda tepidariorum]
2445	same as 2451	XP_015920686.1	124.79	DNA-directed RNA polymerase II subunit RPB2 [Parasteatoda tepidariorum]
2445	same as 2451	XP_015905674.1	70.0922	DNA-directed RNA polymerase III subunit RPC2-like [Parasteatoda tepidariorum]
2447	same as 2451	XP_015920686.1	93.2041	DNA-directed RNA polymerase II subunit RPB2 [Parasteatoda tepidariorum]
2451	ctl	XP_015920686.1	123.25	DNA-directed RNA polymerase II subunit RPB2 [Parasteatoda tepidariorum]
2464	ctl	XP_015908120.2	81.6481	stomatin-like protein 2, mitochondrial [Parasteatoda tepidariorum]
2468	ctl	XP_015925812.1	114.39	general vesicular transport factor p115 [Parasteatoda tepidariorum]
2480	same as 1848	XP_015924847.1	102.064	U5 small nuclear ribonucleoprotein 200 kDa helicase-like [Parasteatoda tepidariorum]
2481	ctl	XP_015906713.1	128.257	propionyl-CoA carboxylase beta chain, mitochondrial-like [Parasteatoda tepidariorum]
2491	ctl	XP_015913883.1	68.5514	3-hydroxy-3-methylglutaryl-coenzyme A reductase [Parasteatoda tepidariorum]
2505	paralogs	XP_015913406.1	206.453	2,3-bisphosphoglycerate-independent phosphoglycerate mutase-like [Parasteatoda tepidariorum]
2505	paralogs	XP_015919560.1	189.889	2,3-bisphosphoglycerate-independent phosphoglycerate mutase-like [Parasteatoda tepidariorum]
2506	ctl	XP_015918102.1	112.464	TM2 domain-containing protein 2-like [Parasteatoda tepidariorum]
2514	ctl	XP_015905137.1	65.0846	kelch-like protein 3 [Parasteatoda tepidariorum]
2522	ctl	XP_015922847.1	140.198	splicing factor 3B subunit 1 isoform X1 [Parasteatoda tepidariorum]
2524	same as 2524	XP_015922847.1	99.7525	splicing factor 3B subunit 1 isoform X1 [Parasteatoda tepidariorum]
2525	same as 2524	XP_015922847.1	100.138	splicing factor 3B subunit 1 isoform X1 [Parasteatoda tepidariorum]
2526	same as 2524	XP_015922847.1	101.293	splicing factor 3B subunit 1 isoform X1 [Parasteatoda tepidariorum]
2528	same as 2524	XP_015922847.1	173.326	splicing factor 3B subunit 1 isoform X1 [Parasteatoda tepidariorum]
2531	same as 2533	XP_015914055.1	86.2705	ubiquitin carboxyl-terminal hydrolase 7 isoform X1 [Parasteatoda tepidariorum]
2532	same as 2533	XP_015914055.1	69.707	ubiquitin carboxyl-terminal hydrolase 7 isoform X1 [Parasteatoda tepidariorum]
2533	ctl	XP_015914055.1	98.5969	ubiquitin carboxyl-terminal hydrolase 7 isoform X1 [Parasteatoda tepidariorum]
2559	ctl	XP_015919112.1	82.4185	RING finger protein 113A [Parasteatoda tepidariorum]
2593	ctl	XP_015914318.1	158.688	ER lumen protein-retaining receptor [Parasteatoda tepidariorum]
2595	same as 1368, 2596	XP_015914886.1	130.183	armadillo segment polarity protein-like isoform X1 [Parasteatoda tepidariorum]
2596	ctl	XP_015914886.1	105.145	armadillo segment polarity protein-like isoform X1 [Parasteatoda tepidariorum]
2618	ctl	XP_015928394.1	83.9593	NADPH--cytochrome P450 reductase [Parasteatoda tepidariorum]
2630	ctl	XP_021001062.1	153.68	GPI ethanolamine phosphate transferase 1-like [Parasteatoda tepidariorum]
2641	ctl	XP_015907914.1	85.1149	membralin [Parasteatoda tepidariorum]
2643	ctl	XP_015930265.2	118.627	V-type proton ATPase catalytic subunit A [Parasteatoda tepidariorum]
2644	same as 2643	XP_015930265.2	81.6481	V-type proton ATPase catalytic subunit A [Parasteatoda tepidariorum]
2659	paralogs	XP_015927265.1	111.309	neural-cadherin [Parasteatoda tepidariorum]
2659	paralogs	XP_015923569.1	111.309	neural-cadherin-like [Parasteatoda tepidariorum]
2659	paralogs	XP_015922304.1	121.324	neural-cadherin-like isoform X1 [Parasteatoda tepidariorum]
2668	ctl	XP_015907384.1	76.6406	AP-1 complex subunit beta-1 [Parasteatoda tepidariorum]
2689	ctl	XP_015917138.1	90.1225	putative pre-mRNA-splicing factor ATP-dependent RNA helicase PRP1 isoform X1 [Parasteatoda tepidariorum]
2690	ctl	XP_015920020.2	89.7373	cGMP-specific 3',5'-cyclic phosphodiesterase [Parasteatoda tepidariorum]
2690	ctl	XP_021004077.1	77.7962	dual 3',5'-cyclic-AMP and -GMP phosphodiesterase 11 [Parasteatoda tepidariorum]
2692	ctl	XP_015922458.1	155.221	CREB-binding protein isoform X1 [Parasteatoda tepidariorum]
2692	ctl	XP_015910461.1	102.064	histone acetyltransferase p300-like [Parasteatoda tepidariorum]
2701	ctl	XP_021004037.1	114.775	transportin-1 [Parasteatoda tepidariorum]
2701	ctl	XP_021004184.1	114.775	transportin-1-like [Parasteatoda tepidariorum]
2712	same as 2713	XP_015909551.1	96.6709	splicing factor 3B subunit 3-like [Parasteatoda tepidariorum]
2713	ctl	XP_015909551.1	90.5077	splicing factor 3B subunit 3-like [Parasteatoda tepidariorum]
2715	ctl	XP_021002020.1	92.4337	calpain-7-like [Parasteatoda tepidariorum]
2735	ctl	XP_015930284.2	121.709	26S proteasome non-ATPase regulatory subunit 11-like [Parasteatoda tepidariorum]
2736	ctl	XP_015907861.1	102.449	LIM and senescent cell antigen-like-containing domain protein 1 isoform X1 [Parasteatoda tepidariorum]
2745	ctl	XP_015924314.1	127.487	uncharacterized protein LOC107452366 [Parasteatoda tepidariorum]
2746	same as 2745	XP_015924314.1	104.76	uncharacterized protein LOC107452366 [Parasteatoda tepidariorum]
2769	ctl	XP_015929210.1	116.701	leucine-zipper-like transcriptional regulator 1 [Parasteatoda tepidariorum]
2774	paralogs	XP_015924895.1	107.071	uncharacterized protein LOC107452819 [Parasteatoda tepidariorum]
2774	paralogs	XP_015928071.1	112.849	uncharacterized protein LOC107455124 [Parasteatoda tepidariorum]
2777	ctl	XP_015909995.1	107.842	beta-1,4-mannosyltransferase egh [Parasteatoda tepidariorum]
2793	ctl	XP_015911661.2	120.168	mothers against decapentaplegic homolog 4 [Parasteatoda tepidariorum]
2805	ctl	XP_021003690.1	111.694	arf-GAP with SH3 domain, ANK repeat and PH domain-containing protein 2 [Parasteatoda tepidariorum]
2819	ctl	XP_015916048.1	77.411	protein pellino [Parasteatoda tepidariorum]
2875	ctl	XP_021004165.1	85.5001	low-density lipoprotein receptor-related protein 1-like [Parasteatoda tepidariorum]
2876	ctl	XP_021003096.1	67.0106	otoferlin [Parasteatoda tepidariorum]
2876	ctl	XP_021001686.1	119.398	otoferlin-like [Parasteatoda tepidariorum]
2888	ctl	XP_015920111.1	173.711	kelch-like protein 26 [Parasteatoda tepidariorum]
2901	paralogs	XP_015924187.1	87.0409	diacylglycerol kinase theta isoform X1 [Parasteatoda tepidariorum]
2907	ctl	XP_015905765.1	82.0333	alpha-actinin isoform X1 [Parasteatoda tepidariorum]
2919	paralogs	XP_015920760.1	74.7146	centromere-associated protein E [Parasteatoda tepidariorum]
2919	paralogs	XP_015929147.1	115.546	LOW QUALITY PROTEIN: trichohyalin-like [Parasteatoda tepidariorum]
2920	paralogs	XP_021002553.1	89.7373	kinesin-like protein KIF13A [Parasteatoda tepidariorum]
2926	ctl	XP_021002166.1	104.76	plastin-2-like [Parasteatoda tepidariorum]
2928	ctl	XP_015909726.1	105.145	26S protease regulatory subunit 7 [Parasteatoda tepidariorum]
2938	same as 590	XP_015927848.1	149.443	myosin-VIIa isoform X1 [Parasteatoda tepidariorum]
2947	ctl	XP_021001198.1	100.523	ral GTPase-activating protein subunit alpha-1, partial [Parasteatoda tepidariorum]
2952	ctl	XP_015930256.1	168.703	apoptosis-inducing factor 1, mitochondrial-like [Parasteatoda tepidariorum]
2974	ctl	XP_015907081.1	99.7525	sarcolemmal membrane-associated protein [Parasteatoda tepidariorum]
2978	ctl	XP_021003162.1	76.2554	eukaryotic translation initiation factor 3 subunit C [Parasteatoda tepidariorum]
2978	ctl	XP_021003171.1	76.2554	eukaryotic translation initiation factor 3 subunit C-like [Parasteatoda tepidariorum]
2983	ctl	XP_015909440.1	119.398	phosphate carrier protein, mitochondrial-like [Parasteatoda tepidariorum]
2986	ctl	XP_015909345.1	99.3673	voltage-dependent calcium channel gamma-7 subunit-like [Parasteatoda tepidariorum]
3022	ctl	XP_015916717.1	123.635	probable ATP-dependent RNA helicase DDX23 [Parasteatoda tepidariorum]
3050	ctl	XP_015905136.1	131.339	U4/U6.U5 tri-snRNP-associated protein 2 [Parasteatoda tepidariorum]
3051	ctl	XP_015914103.2	101.293	regulator of telomere elongation helicase 1 homolog isoform X1 [Parasteatoda tepidariorum]
3053	ctl	XP_015914011.1	111.309	tRNA-splicing ligase RtcB homolog [Parasteatoda tepidariorum]
3054	ctl	XP_015924728.1	151.369	CMP-sialic acid transporter 1-like [Parasteatoda tepidariorum]
3063	paralogs	XP_015917076.1	97.8265	uncharacterized protein LOC107446821 isoform X5 [Parasteatoda tepidariorum]
3065	ctl	XP_015922262.1	112.464	26S proteasome non-ATPase regulatory subunit 1 [Parasteatoda tepidariorum]
3066	same as 3068	XP_021001623.1	96.6709	structural maintenance of chromosomes protein 3 [Parasteatoda tepidariorum]
3066	same as 3068	XP_021000124.1	96.6709	structural maintenance of chromosomes protein 3-like [Parasteatoda tepidariorum]
3067	same as 3068	XP_021001623.1	83.5741	structural maintenance of chromosomes protein 3 [Parasteatoda tepidariorum]
3067	same as 3068	XP_021000124.1	87.4261	structural maintenance of chromosomes protein 3-like [Parasteatoda tepidariorum]
3068	ctl	XP_021001623.1	73.1738	structural maintenance of chromosomes protein 3 [Parasteatoda tepidariorum]
3068	ctl	XP_021000124.1	76.6406	structural maintenance of chromosomes protein 3-like [Parasteatoda tepidariorum]
3074	ctl	XP_015928064.1	70.8626	charged multivesicular body protein 3 [Parasteatoda tepidariorum]
3082	ctl	XP_015916125.1	140.198	fumarate hydratase, mitochondrial [Parasteatoda tepidariorum]
3086	ctl	XP_015915053.1	82.4185	phosphoglucomutase-2-like [Parasteatoda tepidariorum]
3090	ctl	XP_015920234.1	138.658	SNW domain-containing protein 1-like [Parasteatoda tepidariorum]
3102	same as 3103	XP_015922997.1	96.2857	putative GPI-anchor transamidase [Parasteatoda tepidariorum]
3103	ctl	XP_015922997.1	69.707	putative GPI-anchor transamidase [Parasteatoda tepidariorum]
3112	ctl	XP_015907481.1	92.8189	ionotropic receptor 25a-like [Parasteatoda tepidariorum]
3125	ctl	XP_021002796.1	99.3673	sideroflexin-1 isoform X1 [Parasteatoda tepidariorum]
3125	ctl	XP_015911841.1	91.6633	sideroflexin-1-like [Parasteatoda tepidariorum]
3151	ctl	XP_021000095.1	67.3958	bifunctional lysine-specific demethylase and histidyl-hydroxylase NO66 isoform X3 [Parasteatoda tepidariorum]
3165	ctl	XP_015910442.1	84.3445	DNA helicase INO80 isoform X1 [Parasteatoda tepidariorum]
3169	paralogs	XP_021004600.1	80.1073	diacylglycerol kinase 1-like [Parasteatoda tepidariorum]
3169	paralogs	XP_015917616.1	69.707	diacylglycerol kinase epsilon [Parasteatoda tepidariorum]
3169	paralogs	XP_015906415.1	68.5514	diacylglycerol kinase eta isoform X1 [Parasteatoda tepidariorum]
3169	paralogs	XP_015924189.1	176.792	diacylglycerol kinase theta isoform X3 [Parasteatoda tepidariorum]
3169	paralogs	XP_021002091.1	88.1965	eye-specific diacylglycerol kinase-like [Parasteatoda tepidariorum]
3183	ctl	XP_015911633.1	108.997	exocyst complex component 6B isoform X1 [Parasteatoda tepidariorum]
3194	paralogs	XP_015926802.2	97.4413	uncharacterized protein LOC107454206 [Parasteatoda tepidariorum]
3199	ctl	XP_015906504.1	102.449	NAD-dependent protein deacetylase sirtuin-1 [Parasteatoda tepidariorum]
3201	ctl	XP_015930681.2	148.288	cholecystokinin receptor-like [Parasteatoda tepidariorum]
3201	ctl	XP_015922792.1	154.451	pyroglutamylated RFamide peptide receptor-like [Parasteatoda tepidariorum]
3214	ctl	XP_021001266.1	125.176	gamma-aminobutyric acid type B receptor subunit 1-like [Parasteatoda tepidariorum]
3215	ctl	XP_015912201.1	152.525	ubiquitin domain-containing protein 2 isoform X1 [Parasteatoda tepidariorum]
3225	ctl	XP_015911146.1	117.087	gamma-tubulin complex component 2 [Parasteatoda tepidariorum]
3236	same as 1238	XP_015920860.1	87.0409	mannose-1-phosphate guanyltransferase beta [Parasteatoda tepidariorum]
3239	paralogs	XP_015912039.1	114.775	dentin sialophosphoprotein [Parasteatoda tepidariorum]
3239	paralogs	XP_015910728.1	85.8853	suppressor of cytokine signaling 5-like [Parasteatoda tepidariorum]
3253	ctl	XP_015926876.1	79.337	LOW QUALITY PROTEIN: pecanex-like protein 1 [Parasteatoda tepidariorum]
3257	paralogs	XP_021004170.1	75.0998	transient receptor potential cation channel subfamily V member 5 [Parasteatoda tepidariorum]
3267	paralogs	XP_015916833.1	147.517	mothers against decapentaplegic homolog 3 [Parasteatoda tepidariorum]
3267	paralogs	XP_015911661.2	76.2554	mothers against decapentaplegic homolog 4 [Parasteatoda tepidariorum]
3267	paralogs	XP_015906690.1	114.775	protein mothers against dpp isoform X1 [Parasteatoda tepidariorum]
3274	ctl	XP_015924564.2	100.138	ribonuclease 3-like [Parasteatoda tepidariorum]
3278	ctl	XP_015904539.1	134.42	DNA damage-binding protein 1-like [Parasteatoda tepidariorum]
3283	ctl	XP_015915325.1	71.633	cyclin-T2 [Parasteatoda tepidariorum]
3297	ctl	XP_015928243.1	103.99	ras-related protein Rab-11A [Parasteatoda tepidariorum]
3297	ctl	XP_015912455.1	67.3958	ras-related protein Rab-2 [Parasteatoda tepidariorum]
3299	ctl	XP_015911330.1	112.464	pre-mRNA-splicing regulator WTAP isoform X1 [Parasteatoda tepidariorum]
3312	ctl	XP_015929739.1	110.153	ras-related protein Rab-5C-like [Parasteatoda tepidariorum]
3315	same as 3316	XP_021003514.1	83.5741	COP9 signalosome complex subunit 5-like [Parasteatoda tepidariorum]
3316	ctl	XP_021003514.1	116.701	COP9 signalosome complex subunit 5-like [Parasteatoda tepidariorum]
3328	paralogs	XP_015903474.1	115.161	enolase [Parasteatoda tepidariorum]
3332	same as 3334	XP_015911666.1	94.7449	DNA-directed RNA polymerase II subunit RPB1 [Parasteatoda tepidariorum]
3333	same as 3334	XP_015911666.1	91.6633	DNA-directed RNA polymerase II subunit RPB1 [Parasteatoda tepidariorum]
3334	ctl	XP_015911666.1	135.576	DNA-directed RNA polymerase II subunit RPB1 [Parasteatoda tepidariorum]
3336	same as 3334	XP_021002627.1	67.0106	DNA-directed RNA polymerase I subunit RPA1-like [Parasteatoda tepidariorum]
3336	same as 3334	XP_015911666.1	146.747	DNA-directed RNA polymerase II subunit RPB1 [Parasteatoda tepidariorum]
3336	same as 3334	XP_015903993.1	91.6633	DNA-directed RNA polymerase III subunit RPC1-like [Parasteatoda tepidariorum]
3339	same as 3334	XP_015911666.1	203.371	DNA-directed RNA polymerase II subunit RPB1 [Parasteatoda tepidariorum]
3340	same as 3334	XP_015911666.1	143.28	DNA-directed RNA polymerase II subunit RPB1 [Parasteatoda tepidariorum]
3341	same as 3334	XP_015911666.1	166.007	DNA-directed RNA polymerase II subunit RPB1 [Parasteatoda tepidariorum]
3368	paralogs	XP_015922901.1	67.781	uncharacterized protein C45G9.7-like [Parasteatoda tepidariorum]
3369	ctl	XP_015918838.1	101.293	E3 ubiquitin-protein ligase SIAH1 isoform X1 [Parasteatoda tepidariorum]
3396	ctl	XP_021003960.1	135.191	WD repeat-containing protein 44-like [Parasteatoda tepidariorum]
3402	ctl	XP_015912986.1	115.931	cyclin-dependent kinase 2-associated protein 1 [Parasteatoda tepidariorum]
3403	ctl	XP_015906955.1	115.161	cleavage and polyadenylation specificity factor subunit 1 [Parasteatoda tepidariorum]
3423	ctl	XP_021001970.1	137.502	zinc finger SWIM domain-containing protein 8 [Parasteatoda tepidariorum]
3428	ctl	XP_015909967.1	154.836	neurofibromin-like isoform X1 [Parasteatoda tepidariorum]
3453	ctl	XP_021003306.1	89.3521	signal transducer and activator of transcription 5B [Parasteatoda tepidariorum]
3462	ctl	XP_021004079.1	100.908	copper-transporting ATPase 1-like [Parasteatoda tepidariorum]
3464	ctl	XP_015924602.1	140.969	rho GTPase-activating protein 190 isoform X1 [Parasteatoda tepidariorum]
3472	ctl	XP_015923941.1	68.9366	ER degradation-enhancing alpha-mannosidase-like protein 1 [Parasteatoda tepidariorum]
3477	ctl	XP_015906838.1	128.642	cohesin subunit SA-1 [Parasteatoda tepidariorum]
3478	paralogs	XP_015903843.1	72.4034	NADH dehydrogenase [ubiquinone] flavoprotein 1, mitochondrial [Parasteatoda tepidariorum]
3482	ctl	XP_015925989.1	78.5666	leucine--tRNA ligase, cytoplasmic isoform X2 [Parasteatoda tepidariorum]
3493	ctl	XP_021003945.1	127.487	ribonucleoside-diphosphate reductase large subunit-like isoform X2 [Parasteatoda tepidariorum]
3495	ctl	XP_015909383.1	97.8265	actin-related protein 3 [Parasteatoda tepidariorum]
3506	ctl	XP_015916514.1	114.39	ankyrin repeat domain-containing protein 12 [Parasteatoda tepidariorum]
3510	ctl	XP_015929850.1	131.339	protein CWC15 homolog [Parasteatoda tepidariorum]
3543	ctl	XP_015908310.1	179.489	double-stranded RNA-binding protein Staufen homolog 2 isoform X1 [Parasteatoda tepidariorum]
3554	paralogs	XP_021000600.1	148.288	transcription initiation factor TFIID subunit 1 [Parasteatoda tepidariorum]
3554	paralogs	XP_015906224.1	103.605	transcription initiation factor TFIID subunit 1-like [Parasteatoda tepidariorum]
3571	ctl	XP_015904380.1	119.398	phosphatidylserine synthase 1 [Parasteatoda tepidariorum]
3571	ctl	XP_015922293.1	109.768	phosphatidylserine synthase 1-like [Parasteatoda tepidariorum]
3572	ctl	XP_015915080.1	152.91	intron-binding protein aquarius-like [Parasteatoda tepidariorum]
3575	same as 3573	XP_015915080.1	137.117	intron-binding protein aquarius-like [Parasteatoda tepidariorum]
3587	ctl	XP_015905651.1	102.064	zinc finger RNA-binding protein [Parasteatoda tepidariorum]
3611	ctl	XP_015905887.1	82.0333	intraflagellar transport protein 172 homolog [Parasteatoda tepidariorum]
3644	ctl	XP_015905153.1	379.022	YTH domain-containing family protein 3-like [Parasteatoda tepidariorum]
3654	ctl	XP_021002240.1	76.2554	helicase domino isoform X1 [Parasteatoda tepidariorum]
3669	ctl	XP_015915307.1	114.39	SH2B adapter protein 2-like [Parasteatoda tepidariorum]
3692	ctl	XP_015926661.1	98.2117	40S ribosomal protein S16 [Parasteatoda tepidariorum]
3695	paralogs	XP_015912559.1	72.7886	lon protease homolog 2, peroxisomal-like isoform X1 [Parasteatoda tepidariorum]
3695	paralogs	XP_015928402.1	85.1149	lon protease homolog, mitochondrial-like [Parasteatoda tepidariorum]
3706	same as 3705	XP_021001455.1	120.939	crooked neck-like protein 1 [Parasteatoda tepidariorum]
3712	ctl	XP_015926452.1	69.707	GTPase-activating protein and VPS9 domain-containing protein 1 isoform X1 [Parasteatoda tepidariorum]
3715	ctl	XP_021003098.1	98.5969	splicing factor 3A subunit 1-like [Parasteatoda tepidariorum]
3759	ctl	XP_015924515.1	83.1889	1-phosphatidylinositol 4,5-bisphosphate phosphodiesterase gamma-1 [Parasteatoda tepidariorum]
3764	ctl	XP_015912038.1	189.504	lysine-specific demethylase 4A-like [Parasteatoda tepidariorum]
3779	ctl	XP_015905730.1	135.191	mitochondrial intermediate peptidase [Parasteatoda tepidariorum]
3796	ctl	XP_015903986.1	93.2041	putative E3 ubiquitin-protein ligase UNKL [Parasteatoda tepidariorum]
3802	ctl	XP_015904268.1	111.309	ras-related GTP-binding protein C-like [Parasteatoda tepidariorum]
3811	paralogs	XP_015923987.1	74.7146	heparan-alpha-glucosaminide N-acetyltransferase-like isoform X1 [Parasteatoda tepidariorum]
3814	ctl	XP_015903994.1	97.0561	serine/threonine-protein phosphatase 2B catalytic subunit 2-like isoform X1 [Parasteatoda tepidariorum]
3814	ctl	XP_015918073.1	97.0561	serine/threonine-protein phosphatase 2B catalytic subunit 3-like [Parasteatoda tepidariorum]
3817	ctl	XP_021000231.1	120.168	regulator of nonsense transcripts 1-like [Parasteatoda tepidariorum]
3818	same as 3817	XP_021000231.1	103.99	regulator of nonsense transcripts 1-like [Parasteatoda tepidariorum]
3831	ctl	XP_015921228.1	104.76	GTP-binding protein Di-Ras2 [Parasteatoda tepidariorum]
3831	ctl	XP_015910455.1	112.464	GTP-binding protein Di-Ras2-like isoform X1 [Parasteatoda tepidariorum]
3831	ctl	XP_015919623.1	122.865	GTPase HRas [Parasteatoda tepidariorum]
3831	ctl	XP_015913470.1	124.405	ras-related protein M-Ras-like [Parasteatoda tepidariorum]
3831	ctl	XP_015911550.1	124.79	ras-related protein Ral-A isoform X1 [Parasteatoda tepidariorum]
3831	ctl	XP_021001767.1	164.851	ras-related protein Rap-1b [Parasteatoda tepidariorum]
3831	ctl	XP_015918032.1	103.219	ras-related protein Rap-1b-like [Parasteatoda tepidariorum]
3831	ctl	XP_015921961.1	103.99	ras-related protein Rap-1b-like [Parasteatoda tepidariorum]
3831	ctl	XP_015931023.1	287.345	ras-related protein Rap-2c [Parasteatoda tepidariorum]
3834	ctl	XP_015903448.1	104.76	eukaryotic peptide chain release factor subunit 1 [Parasteatoda tepidariorum]
3862	ctl	XP_015929246.1	83.9593	E3 ubiquitin-protein ligase MIB1 [Parasteatoda tepidariorum]
3866	ctl	XP_015915174.1	171.785	transmembrane protein 189 [Parasteatoda tepidariorum]
3869	ctl	XP_015926704.2	31.9574	wee1-like protein kinase 2 [Parasteatoda tepidariorum]
3873	ctl	XP_015922413.1	92.8189	RNA-binding protein cabeza isoform X1 [Parasteatoda tepidariorum]
3898	ctl	XP_021002497.1	106.301	chromodomain-helicase-DNA-binding protein 7 [Parasteatoda tepidariorum]
3900	ctl	XP_021001419.1	102.449	ATP-dependent RNA helicase DHX8 [Parasteatoda tepidariorum]
3900	ctl	XP_015913147.1	73.1738	ATP-dependent RNA helicase DHX8 isoform X1 [Parasteatoda tepidariorum]
3932	ctl	XP_015915148.1	93.2041	eukaryotic translation initiation factor 5A-1 [Parasteatoda tepidariorum]
3947	ctl	XP_015914689.1	93.9745	DDB1- and CUL4-associated factor 7 [Parasteatoda tepidariorum]
3965	paralogs	XP_015923530.1	98.5969	coronin-2B-like [Parasteatoda tepidariorum]
3965	paralogs	XP_021001700.1	139.813	coronin-6-like [Parasteatoda tepidariorum]
3965	paralogs	XP_021003195.1	153.295	coronin-6-like [Parasteatoda tepidariorum]
3985	ctl	XP_015923225.1	67.3958	fukutin [Parasteatoda tepidariorum]
3993	ctl	XP_021001555.1	102.449	1-phosphatidylinositol 3-phosphate 5-kinase-like [Parasteatoda tepidariorum]
4000	ctl	XP_021004667.1	92.0485	(E3-independent) E2 ubiquitin-conjugating enzyme UBE2O [Parasteatoda tepidariorum]
4001	same as 4000	XP_021004667.1	82.4185	(E3-independent) E2 ubiquitin-conjugating enzyme UBE2O [Parasteatoda tepidariorum]
4002	ctl	XP_015914078.1	104.76	BAH and coiled-coil domain-containing protein 1 isoform X1 [Parasteatoda tepidariorum]
4006	paralogs	XP_015920583.1	56.225	ribonucleoside-diphosphate reductase subunit M2-like [Parasteatoda tepidariorum]
4023	ctl	XP_021003209.1	127.872	40S ribosomal protein S3 [Parasteatoda tepidariorum]
4024	ctl	XP_015925152.1	134.035	MBT domain-containing protein 1 [Parasteatoda tepidariorum]
4024	ctl	XP_021003465.1	145.591	MBT domain-containing protein 1-like [Parasteatoda tepidariorum]
4024	ctl	XP_015906606.1	66.2402	scm-like with four MBT domains protein 1 [Parasteatoda tepidariorum]
4025	ctl	XP_021000766.1	94.7449	spectrin alpha chain-like [Parasteatoda tepidariorum]
4026	same as 1923, 2010, 4175	XP_021000807.1	103.99	spectrin alpha chain [Parasteatoda tepidariorum]
4027	same as 1923, 2010, 4175	XP_021000807.1	94.3597	spectrin alpha chain [Parasteatoda tepidariorum]
4038	paralogs	XP_015926692.1	79.337	aryl hydrocarbon receptor isoform X2 [Parasteatoda tepidariorum]
4038	paralogs	XP_015931037.1	80.1073	uncharacterized protein LOC107457394 [Parasteatoda tepidariorum]
4043	same as 4044	XP_021001419.1	130.954	ATP-dependent RNA helicase DHX8 [Parasteatoda tepidariorum]
4043	same as 4044	XP_015913147.1	116.316	ATP-dependent RNA helicase DHX8 isoform X1 [Parasteatoda tepidariorum]
4044	ctl	XP_021001419.1	154.066	ATP-dependent RNA helicase DHX8 [Parasteatoda tepidariorum]
4050	paralogs	XP_020999916.1	68.1662	muscle calcium channel subunit alpha-1 [Parasteatoda tepidariorum]
4050	paralogs	XP_021004541.1	73.9442	muscle calcium channel subunit alpha-1-like [Parasteatoda tepidariorum]
4050	paralogs	XP_015923970.1	68.1662	muscle calcium channel subunit alpha-1-like, partial [Parasteatoda tepidariorum]
4050	paralogs	XP_015920161.1	83.5741	voltage-dependent calcium channel type A subunit alpha-1 isoform X1 [Parasteatoda tepidariorum]
4050	paralogs	XP_021002012.1	84.7297	voltage-dependent calcium channel type A subunit alpha-1-like [Parasteatoda tepidariorum]
4059	ctl	XP_015918106.1	98.2117	LOW QUALITY PROTEIN: paraplegin-like [Parasteatoda tepidariorum]
4064	ctl	XP_015912772.1	77.7962	retinal rod rhodopsin-sensitive cGMP 3',5'-cyclic phosphodiesterase subunit delta [Parasteatoda tepidariorum]
4080	ctl	XP_015931041.1	158.303	atypical protein kinase C [Parasteatoda tepidariorum]
4080	ctl	XP_015916612.1	83.5741	calcium-independent protein kinase C [Parasteatoda tepidariorum]
4080	ctl	XP_021000745.1	85.1149	protein kinase C, brain isozyme-like [Parasteatoda tepidariorum]
4080	ctl	XP_015903584.1	81.6481	putative leucine-rich repeat-containing protein DDB_G0290503 isoform X1 [Parasteatoda tepidariorum]
4080	ctl	XP_021002147.1	81.6481	putative protein kinase C delta type homolog isoform X3 [Parasteatoda tepidariorum]
4084	same as 1197	XP_015908140.1	97.8265	inositol 1,4,5-trisphosphate receptor [Parasteatoda tepidariorum]
4085	same as 1197	XP_015908140.1	58.9214	inositol 1,4,5-trisphosphate receptor [Parasteatoda tepidariorum]
4085	same as 1197	XP_015917817.1	58.9214	inositol 1,4,5-trisphosphate receptor [Parasteatoda tepidariorum]
4090	ctl	XP_015907570.1	119.398	laminin subunit beta-1 isoform X3 [Parasteatoda tepidariorum]
4095	paralogs	XP_015930260.1	72.0182	E3 ubiquitin-protein ligase RNF185 [Parasteatoda tepidariorum]
4109	ctl	XP_015929231.1	108.612	menin isoform X1 [Parasteatoda tepidariorum]
4119	ctl	XP_015911264.1	122.865	homeobox-containing protein 1 isoform X1 [Parasteatoda tepidariorum]
4119	ctl	XP_015924754.2	127.487	homeobox-containing protein 1-like [Parasteatoda tepidariorum]
4120	ctl	XP_021000568.1	121.324	vacuolar protein sorting-associated protein 26B-like, partial [Parasteatoda tepidariorum]
4138	ctl	XP_015903557.1	135.576	microtubule-associated serine/threonine-protein kinase 3-like isoform X1 [Parasteatoda tepidariorum]
4162	ctl	XP_015929424.1	126.716	tankyrase-2-like [Parasteatoda tepidariorum]
4175	same as 1923, 2010	XP_021000807.1	94.7449	spectrin alpha chain [Parasteatoda tepidariorum]
4181	ctl	XP_021004458.1	108.612	phosphatidylinositol N-acetylglucosaminyltransferase subunit A-like [Parasteatoda tepidariorum]
4188	ctl	XP_015905578.1	82.8037	60S ribosomal protein L35 [Parasteatoda tepidariorum]
4192	paralogs	XP_021003579.1	106.686	uncharacterized protein LOC107445721 isoform X1 [Parasteatoda tepidariorum]
4192	paralogs	XP_021003585.1	106.686	zinc finger protein castor homolog 1 isoform X3 [Parasteatoda tepidariorum]
4205	ctl	XP_015910760.1	87.8113	talin-2 [Parasteatoda tepidariorum]
4206	same as 4205, 5284	XP_015910760.1	100.523	talin-2 [Parasteatoda tepidariorum]
4228	ctl	XP_015921028.1	92.0485	sphingolipid delta(4)-desaturase DES1 [Parasteatoda tepidariorum]
4231	ctl	XP_015916129.2	73.9442	26S protease regulatory subunit 4 [Parasteatoda tepidariorum]
4231	ctl	XP_021001363.1	71.633	26S protease regulatory subunit 6B [Parasteatoda tepidariorum]
4231	ctl	XP_015923192.2	151.369	ATPase family AAA domain-containing protein 2-like [Parasteatoda tepidariorum]
4231	ctl	XP_015913294.1	81.2629	peroxisome assembly factor 2 [Parasteatoda tepidariorum]
4231	ctl	XP_015914082.1	79.337	transitional endoplasmic reticulum ATPase isoform X1 [Parasteatoda tepidariorum]
4235	ctl	XP_015925299.1	129.798	actin-related protein 2/3 complex subunit 4 [Parasteatoda tepidariorum]
4236	same as 4235	XP_015925299.1	117.857	actin-related protein 2/3 complex subunit 4 [Parasteatoda tepidariorum]
4246	ctl	XP_015919255.1	115.931	eukaryotic translation initiation factor 3 subunit I-like [Parasteatoda tepidariorum]
4254	ctl	XP_021002962.1	68.5514	histone-lysine N-methyltransferase SETD2 [Parasteatoda tepidariorum]
4254	ctl	XP_015921888.1	72.4034	histone-lysine N-methyltransferase SETD2-like isoform X1 [Parasteatoda tepidariorum]
4254	ctl	XP_015917304.1	136.346	uncharacterized protein LOC107447015 isoform X1 [Parasteatoda tepidariorum]
4254	ctl	XP_015919381.1	71.2478	uncharacterized protein LOC107448625 [Parasteatoda tepidariorum]
4255	ctl	XP_015907416.1	145.206	transmembrane protein 47 [Parasteatoda tepidariorum]
4271	ctl	XP_015907983.1	135.191	synaptotagmin-14-like isoform X1 [Parasteatoda tepidariorum]
4274	same as 4275	XP_015929577.2	98.2117	histone-binding protein RBBP4, partial [Parasteatoda tepidariorum]
4275	ctl	XP_015929577.2	123.25	histone-binding protein RBBP4, partial [Parasteatoda tepidariorum]
4276	ctl	XP_015922177.1	146.747	histone-binding protein RBBP7 [Parasteatoda tepidariorum]
4301	ctl	XP_015915207.1	92.0485	inositol hexakisphosphate and diphosphoinositol-pentakisphosphate kinase isoform X1 [Parasteatoda tepidariorum]
4312	same as 4312	XP_015927117.2	104.76	N-alpha-acetyltransferase 15, NatA auxiliary subunit-like [Parasteatoda tepidariorum]
4313	ctl	XP_015927117.2	91.6633	N-alpha-acetyltransferase 15, NatA auxiliary subunit-like [Parasteatoda tepidariorum]
4326	ctl	XP_020999948.1	105.145	ubiquitin-conjugating enzyme E2 J2-like [Parasteatoda tepidariorum]
4331	ctl	XP_015929629.1	131.724	E3 ubiquitin-protein ligase TRIM37-like [Parasteatoda tepidariorum]
4336	ctl	XP_015916766.1	102.834	tetraspanin-5 isoform X1 [Parasteatoda tepidariorum]
4351	ctl	XP_015915188.1	92.0485	ubiquitin carboxyl-terminal hydrolase isozyme L5 [Parasteatoda tepidariorum]
4354	ctl	XP_015916542.1	102.834	D-glucuronyl C5-epimerase [Parasteatoda tepidariorum]
4361	ctl	XP_021000583.1	102.834	tight junction protein ZO-1 [Parasteatoda tepidariorum]
4362	ctl	XP_015905516.1	118.627	anaphase-promoting complex subunit 4 [Parasteatoda tepidariorum]
4396	ctl	XP_020999894.1	103.99	protein sel-1 homolog 1-like [Parasteatoda tepidariorum]
4405	ctl	XP_015910769.1	112.079	cytoplasmic aconitate hydratase-like, partial [Parasteatoda tepidariorum]
4408	same as 4409	XP_021003800.1	88.9669	ATP-citrate synthase-like [Parasteatoda tepidariorum]
4409	ctl	XP_021003800.1	149.828	ATP-citrate synthase-like [Parasteatoda tepidariorum]
4416	paralogs	XP_021002101.1	119.783	uncharacterized protein LOC107445731 [Parasteatoda tepidariorum]
4417	ctl	XP_021004185.1	98.2117	macoilin-1-like [Parasteatoda tepidariorum]
4427	ctl	XP_015916914.1	127.487	inositol-3-phosphate synthase-like [Parasteatoda tepidariorum]
4445	ctl	XP_015909581.1	194.512	calcium-dependent secretion activator isoform X8 [Parasteatoda tepidariorum]
4446	same as 4445	XP_015909587.1	103.219	calcium-dependent secretion activator isoform X13 [Parasteatoda tepidariorum]
4447	same as 4451	XP_021001770.1	117.087	E3 ubiquitin-protein ligase UBR4 [Parasteatoda tepidariorum]
4448	same as 4451	XP_021001770.1	147.132	E3 ubiquitin-protein ligase UBR4 [Parasteatoda tepidariorum]
4449	same as 4451	XP_021001770.1	127.487	E3 ubiquitin-protein ligase UBR4 [Parasteatoda tepidariorum]
4451	ctl	XP_021001770.1	221.09	E3 ubiquitin-protein ligase UBR4 [Parasteatoda tepidariorum]
4462	ctl	XP_015912427.1	244.202	engulfment and cell motility protein 1 [Parasteatoda tepidariorum]
4468	ctl	XP_015906770.1	301.212	bifunctional glutamate/proline--tRNA ligase [Parasteatoda tepidariorum]
4468	ctl	XP_015913119.2	129.028	glutamine--tRNA ligase [Parasteatoda tepidariorum]
4478	ctl	XP_015908046.1	162.54	peregrin [Parasteatoda tepidariorum]
4487	paralogs	XP_021004541.1	65.4698	muscle calcium channel subunit alpha-1-like [Parasteatoda tepidariorum]
4487	paralogs	XP_015920161.1	102.449	voltage-dependent calcium channel type A subunit alpha-1 isoform X1 [Parasteatoda tepidariorum]
4487	paralogs	XP_021002012.1	96.6709	voltage-dependent calcium channel type A subunit alpha-1-like [Parasteatoda tepidariorum]
4503	ctl	XP_021000977.1	102.834	glucose-6-phosphate 1-dehydrogenase X-like [Parasteatoda tepidariorum]
4520	ctl	XP_021002996.1	64.3142	26S protease regulatory subunit 10B [Parasteatoda tepidariorum]
4520	ctl	XP_015916129.2	70.4774	26S protease regulatory subunit 4 [Parasteatoda tepidariorum]
4520	ctl	XP_021003128.1	108.997	26S protease regulatory subunit 8 [Parasteatoda tepidariorum]
4522	ctl	XP_015920056.1	152.525	116 kDa U5 small nuclear ribonucleoprotein component-like [Parasteatoda tepidariorum]
4522	ctl	XP_015931017.1	67.0106	elongation factor 2 [Parasteatoda tepidariorum]
4523	paralogs	XP_015931017.1	94.7449	elongation factor 2 [Parasteatoda tepidariorum]
4525	ctl	XP_015905339.1	119.013	endoplasmin-like [Parasteatoda tepidariorum]
4525	ctl	XP_015914710.1	257.299	heat shock protein 83 [Parasteatoda tepidariorum]
4534	ctl	XP_015927313.1	130.954	UDP-N-acetylglucosamine--dolichyl-phosphate N-acetylglucosaminephosphotransferase [Parasteatoda tepidariorum]
4539	ctl	XP_015920675.1	177.563	zinc finger HIT domain-containing protein 1-like [Parasteatoda tepidariorum]
4567	ctl	XP_015919762.1	99.7525	BTB/POZ domain-containing protein 2 [Parasteatoda tepidariorum]
4567	ctl	XP_015923931.1	66.2402	BTB/POZ domain-containing protein 3-like [Parasteatoda tepidariorum]
4567	ctl	XP_015907566.1	185.267	BTB/POZ domain-containing protein 6-B-like [Parasteatoda tepidariorum]
4587	ctl	XP_015909550.1	150.984	BTB/POZ domain-containing protein 9-like [Parasteatoda tepidariorum]
4600	same as 4988	XP_015908838.1	104.375	ankyrin repeat and KH domain-containing protein 1 [Parasteatoda tepidariorum]
4603	paralogs	XP_015922672.1	86.6557	ATP synthase subunit alpha, mitochondrial isoform X5 [Parasteatoda tepidariorum]
4603	paralogs	XP_015909715.1	86.6557	ATP synthase subunit alpha, mitochondrial-like, partial [Parasteatoda tepidariorum]
4628	ctl	XP_015919335.1	138.272	40S ribosomal protein S14a [Parasteatoda tepidariorum]
4629	ctl	XP_015910177.1	67.3958	probable phosphorylase b kinase regulatory subunit alpha isoform X1 [Parasteatoda tepidariorum]
4629	ctl	XP_015911538.1	93.2041	probable phosphorylase b kinase regulatory subunit beta [Parasteatoda tepidariorum]
4630	ctl	XP_015918347.1	82.4185	cytoplasmic dynein 1 light intermediate chain 2 [Parasteatoda tepidariorum]
4630	ctl	XP_015930091.1	72.0182	cytoplasmic dynein 1 light intermediate chain 2-like [Parasteatoda tepidariorum]
4640	ctl	XP_015923561.1	209.149	protein FAM50 homolog [Parasteatoda tepidariorum]
4641	same as 4640	XP_015923561.1	118.627	protein FAM50 homolog [Parasteatoda tepidariorum]
4702	paralogs	XP_021003496.1	90.1225	zinc finger protein 813-like [Parasteatoda tepidariorum]
4702	paralogs	XP_015904133.1	101.679	zinc finger protein rotund-like [Parasteatoda tepidariorum]
4731	ctl	XP_021001513.1	83.9593	neurobeachin [Parasteatoda tepidariorum]
4732	ctl	XP_015930770.1	94.3597	cysteine and histidine-rich protein 1-A-like [Parasteatoda tepidariorum]
4732	ctl	XP_021004029.1	96.2857	cysteine and histidine-rich protein 1-B-like [Parasteatoda tepidariorum]
4732	ctl	XP_015923316.1	97.0561	cysteine and histidine-rich protein 1-B-like, partial [Parasteatoda tepidariorum]
4737	ctl	XP_015923521.1	102.064	AFG3-like protein 2 [Parasteatoda tepidariorum]
4737	ctl	XP_015919299.1	240.736	ATP-dependent zinc metalloprotease YME1 homolog [Parasteatoda tepidariorum]
4737	ctl	XP_015918106.1	75.8702	LOW QUALITY PROTEIN: paraplegin-like [Parasteatoda tepidariorum]
4742	ctl	XP_015926856.1	167.933	thioredoxin-like protein 4A [Parasteatoda tepidariorum]
4753	ctl	XP_015923889.1	162.925	60S ribosomal protein L4-A [Parasteatoda tepidariorum]
4754	ctl	XP_015910291.1	88.5817	acid phosphatase type 7-like [Parasteatoda tepidariorum]
4797	same as 4798	XP_015927902.1	128.257	cytoplasmic FMR1-interacting protein-like [Parasteatoda tepidariorum]
4798	ctl	XP_015927902.1	141.354	cytoplasmic FMR1-interacting protein-like [Parasteatoda tepidariorum]
4810	ctl	XP_021001332.1	120.939	26S proteasome non-ATPase regulatory subunit 2 [Parasteatoda tepidariorum]
4811	paralogs	XP_015907122.1	181.8	protein phosphatase PP2A 55 kDa regulatory subunit isoform X1 [Parasteatoda tepidariorum]
4818	ctl	XP_015906444.1	128.642	uncharacterized protein C16orf52 homolog A-like [Parasteatoda tepidariorum]
4825	ctl	XP_015931199.1	105.145	zinc finger homeobox protein 3-like [Parasteatoda tepidariorum]
4825	ctl	XP_015925848.1	181.415	zinc finger homeobox protein 4-like [Parasteatoda tepidariorum]
4827	ctl	XP_021001551.1	140.198	hydroxymethylglutaryl-CoA synthase 1 [Parasteatoda tepidariorum]
4832	paralogs	XP_015905370.1	104.375	protein roadkill [Parasteatoda tepidariorum]
4837	ctl	XP_015906315.1	127.872	frequenin-1-like [Parasteatoda tepidariorum]
4837	ctl	XP_015915173.1	208.764	neurocalcin homolog [Parasteatoda tepidariorum]
4837	ctl	XP_021002679.1	124.02	neuronal calcium sensor 1 [Parasteatoda tepidariorum]
4846	paralogs	XP_021002818.1	73.9442	transcription elongation factor SPT5-like [Parasteatoda tepidariorum]
4847	ctl	XP_021002818.1	101.293	transcription elongation factor SPT5-like [Parasteatoda tepidariorum]
4854	ctl	XP_015928180.1	96.6709	60S acidic ribosomal protein P0-like [Parasteatoda tepidariorum]
4861	ctl	XP_015913004.1	85.1149	chromodomain-helicase-DNA-binding protein Mi-2 homolog isoform X1 [Parasteatoda tepidariorum]
4864	ctl	XP_015927527.2	155.606	LARGE xylosyl- and glucuronyltransferase 1-like [Parasteatoda tepidariorum]
4871	ctl	XP_015922577.1	87.4261	cyclin-dependent-like kinase 5 [Parasteatoda tepidariorum]
4875	ctl	XP_015919216.1	73.1738	actin-2-like [Parasteatoda tepidariorum]
4875	ctl	XP_021000863.1	72.7886	actin-5C-like [Parasteatoda tepidariorum]
4875	ctl	XP_015921489.1	67.0106	actin-6-like [Parasteatoda tepidariorum]
4875	ctl	XP_015916472.1	151.754	actin-related protein 2 isoform X2 [Parasteatoda tepidariorum]
4875	ctl	XP_015926735.1	72.4034	actin, clone 403 isoform X1 [Parasteatoda tepidariorum]
4875	ctl	XP_015912859.1	72.7886	actin, clone 403-like [Parasteatoda tepidariorum]
4875	ctl	XP_015926086.1	72.0182	beta-centractin [Parasteatoda tepidariorum]
4894	same as 4895	XP_015910925.1	118.242	UDP-N-acetylglucosamine--peptide N-acetylglucosaminyltransferase 110 kDa subunit isoform X1 [Parasteatoda tepidariorum]
4895	ctl	XP_015910925.1	211.46	UDP-N-acetylglucosamine--peptide N-acetylglucosaminyltransferase 110 kDa subunit isoform X1 [Parasteatoda tepidariorum]
4906	paralogs	XP_015913464.1	63.929	tyrosine-protein phosphatase non-receptor type 4 isoform X1 [Parasteatoda tepidariorum]
4962	same as 4963	XP_015923088.1	100.908	ubiquitin-conjugating enzyme E2-22 kDa [Parasteatoda tepidariorum]
4963	ctl	XP_015923088.1	100.523	ubiquitin-conjugating enzyme E2-22 kDa [Parasteatoda tepidariorum]
4968	ctl	XP_015904068.1	83.9593	dmX-like protein 2 [Parasteatoda tepidariorum]
4988	ctl	XP_015908838.1	121.324	ankyrin repeat and KH domain-containing protein 1 [Parasteatoda tepidariorum]
4989	same as 4600, 4988	XP_015908838.1	110.538	ankyrin repeat and KH domain-containing protein 1 [Parasteatoda tepidariorum]
4998	ctl	XP_015911908.1	92.8189	NADH dehydrogenase [ubiquinone] iron-sulfur protein 3, mitochondrial [Parasteatoda tepidariorum]
5005	ctl	XP_015923394.1	105.145	cytosolic non-specific dipeptidase-like isoform X1 [Parasteatoda tepidariorum]
5015	ctl	XP_015926041.2	124.79	DNA (cytosine-5)-methyltransferase 1-like, partial [Parasteatoda tepidariorum]
5015	ctl	XP_021000750.1	124.79	DNA (cytosine-5)-methyltransferase PliMCI [Parasteatoda tepidariorum]
5027	ctl	XP_021003609.1	103.99	glycine--tRNA ligase-like [Parasteatoda tepidariorum]
5057	ctl	XP_021002323.1	122.865	ER membrane protein complex subunit 3 [Parasteatoda tepidariorum]
5064	ctl	XP_015907031.1	112.079	AP-3 complex subunit beta-1-like [Parasteatoda tepidariorum]
5067	ctl	XP_015917189.1	108.997	lysine-specific histone demethylase 1A [Parasteatoda tepidariorum]
5068	same as 5067	XP_015917189.1	106.301	lysine-specific histone demethylase 1A [Parasteatoda tepidariorum]
5070	same as 5067	XP_015917188.1	102.449	lysine-specific histone demethylase 1A [Parasteatoda tepidariorum]
5077	paralogs	XP_015924640.1	176.407	follicle-stimulating hormone receptor-like isoform X2 [Parasteatoda tepidariorum]
5077	paralogs	XP_015906881.1	187.193	leucine-rich repeat-containing G-protein coupled receptor 5-like [Parasteatoda tepidariorum]
5077	paralogs	XP_015924639.1	176.407	leucine-rich repeat-containing G-protein coupled receptor 5-like isoform X1 [Parasteatoda tepidariorum]
5077	paralogs	XP_015930954.1	95.1301	thyrotropin receptor [Parasteatoda tepidariorum]
5077	paralogs	XP_021002921.1	93.2041	thyrotropin receptor [Parasteatoda tepidariorum]
5078	ctl	XP_021002075.1	73.9442	gamma-secretase subunit Aph-1 [Parasteatoda tepidariorum]
5083	ctl	XP_021002553.1	73.9442	kinesin-like protein KIF13A [Parasteatoda tepidariorum]
5083	ctl	XP_015924725.1	115.931	kinesin-like protein unc-104 isoform X1 [Parasteatoda tepidariorum]
5089	ctl	XP_015908335.1	161.77	ankyrin repeat domain-containing protein 50-like [Parasteatoda tepidariorum]
5090	paralogs	XP_015908335.1	167.548	ankyrin repeat domain-containing protein 50-like [Parasteatoda tepidariorum]
5090	paralogs	XP_020999980.1	70.4774	kinase D-interacting substrate of 220 kDa [Parasteatoda tepidariorum]
5090	paralogs	XP_015929354.1	68.5514	uncharacterized protein LOC107456095 [Parasteatoda tepidariorum]
5096	paralogs	XP_021001512.1	82.0333	chromatin-remodeling complex ATPase chain Iswi [Parasteatoda tepidariorum]
5098	ctl	XP_015903768.1	147.517	cleavage and polyadenylation specificity factor 73-like [Parasteatoda tepidariorum]
5100	same as 5098	XP_015903768.1	245.743	cleavage and polyadenylation specificity factor 73-like [Parasteatoda tepidariorum]
5100	same as 5098	XP_015925728.1	98.9821	integrator complex subunit 11 [Parasteatoda tepidariorum]
5101	paralogs	XP_015913421.1	147.902	heterogeneous nuclear ribonucleoprotein R isoform X1 [Parasteatoda tepidariorum]
5101	paralogs	XP_021002101.1	93.5893	uncharacterized protein LOC107445731 [Parasteatoda tepidariorum]
5108	ctl	XP_015925985.1	108.997	protein crumbs [Parasteatoda tepidariorum]
5112	ctl	XP_015904397.1	99.7525	ATP synthase lipid-binding protein, mitochondrial-like [Parasteatoda tepidariorum]
5136	paralogs	XP_020999977.1	111.694	serine/threonine-protein phosphatase 2A 56 kDa regulatory subunit delta isoform-like [Parasteatoda tepidariorum]
5136	paralogs	XP_015909483.1	152.91	serine/threonine-protein phosphatase 2A 56 kDa regulatory subunit epsilon isoform isoform X1 [Parasteatoda tepidariorum]
5186	ctl	XP_015910575.1	70.8626	kelch-like protein 18 [Parasteatoda tepidariorum]
5186	ctl	XP_015905473.1	139.428	kelch-like protein diablo [Parasteatoda tepidariorum]
5200	same as 5204, paralogs	XP_021001145.1	99.7525	unconventional myosin-Va-like [Parasteatoda tepidariorum]
5201	same as 5204	XP_021003627.1	80.4925	myosin heavy chain, muscle isoform X7 [Parasteatoda tepidariorum]
5201	same as 5204	XP_021001594.1	86.6557	myosin-I heavy chain [Parasteatoda tepidariorum]
5201	same as 5204	XP_021001564.1	82.4185	unconventional myosin-Ia-like [Parasteatoda tepidariorum]
5201	same as 5204	XP_021001145.1	124.405	unconventional myosin-Va-like [Parasteatoda tepidariorum]
5201	same as 5204	XP_015915641.1	83.1889	unconventional myosin-VI [Parasteatoda tepidariorum]
5204	ctl	XP_021001145.1	80.1073	unconventional myosin-Va-like [Parasteatoda tepidariorum]
5205	same as 5204	XP_021001145.1	84.7297	unconventional myosin-Va-like [Parasteatoda tepidariorum]
5218	ctl	XP_015927265.1	173.711	neural-cadherin [Parasteatoda tepidariorum]
5218	ctl	XP_015923569.1	173.711	neural-cadherin-like [Parasteatoda tepidariorum]
5218	ctl	XP_015922304.1	109.768	neural-cadherin-like isoform X1 [Parasteatoda tepidariorum]
5223	ctl	XP_015930686.1	112.849	glucose-6-phosphate isomerase [Parasteatoda tepidariorum]
5227	ctl	XP_015911243.1	151.754	uncharacterized protein LOC107442241 [Parasteatoda tepidariorum]
5230	ctl	XP_015904688.1	94.7449	DNA polymerase epsilon catalytic subunit A-like [Parasteatoda tepidariorum]
5231	paralogs	XP_015907870.1	118.242	catenin alpha [Parasteatoda tepidariorum]
5238	ctl	XP_015923931.1	113.62	BTB/POZ domain-containing protein 3-like [Parasteatoda tepidariorum]
5238	ctl	XP_015907749.1	67.0106	BTB/POZ domain-containing protein 6-like isoform X2 [Parasteatoda tepidariorum]
5238	ctl	XP_021000275.1	67.0106	uncharacterized protein LOC107439607 isoform X1 [Parasteatoda tepidariorum]
5247	paralogs	XP_021003328.1	128.642	2-oxoglutarate dehydrogenase, mitochondrial-like [Parasteatoda tepidariorum]
5247	paralogs	XP_021000259.1	81.2629	probable 2-oxoglutarate dehydrogenase E1 component DHKTD1, mitochondrial [Parasteatoda tepidariorum]
5248	same as 5247	XP_021003328.1	110.923	2-oxoglutarate dehydrogenase, mitochondrial-like [Parasteatoda tepidariorum]
5249	same as 5247	XP_021003328.1	93.5893	2-oxoglutarate dehydrogenase, mitochondrial-like [Parasteatoda tepidariorum]
5251	paralogs	XP_015929998.1	78.1814	protein argonaute-2-like isoform X2 [Parasteatoda tepidariorum]
5266	paralogs	XP_015930598.1	124.02	myosin heavy chain, muscle isoform X1 [Parasteatoda tepidariorum]
5266	paralogs	XP_015912849.1	139.043	myosin heavy chain, muscle isoform X8 [Parasteatoda tepidariorum]
5284	same as 4205	XP_015910760.1	88.5817	talin-2 [Parasteatoda tepidariorum]
5308	ctl	XP_015922033.1	105.916	Golgi reassembly-stacking protein 2 [Parasteatoda tepidariorum]
5310	ctl	XP_015924118.1	101.679	voltage-dependent L-type calcium channel subunit beta-1-like [Parasteatoda tepidariorum]
5356	ctl	XP_015929012.1	80.1073	exportin-1 [Parasteatoda tepidariorum]
5357	same as 5356	XP_015929012.1	92.4337	exportin-1 [Parasteatoda tepidariorum]
5371	ctl	XP_015909628.1	122.865	mRNA export factor [Parasteatoda tepidariorum]
5384	paralogs	XP_021003662.1	70.8626	FERM domain-containing protein 4A isoform X2 [Parasteatoda tepidariorum]
5384	paralogs	XP_021000876.1	78.1814	uncharacterized protein LOC107442702 isoform X7 [Parasteatoda tepidariorum]
5387	paralogs	XP_015913582.1	63.929	glycogen phosphorylase [Parasteatoda tepidariorum]
5387	paralogs	XP_015917698.1	65.855	glycogen phosphorylase-like [Parasteatoda tepidariorum]
5394	ctl	XP_020999903.1	126.331	sorting nexin-27 [Parasteatoda tepidariorum]
5395	same as 5394	XP_020999903.1	130.568	sorting nexin-27 [Parasteatoda tepidariorum]
5403	ctl	XP_015916018.2	147.902	striatin-interacting protein 1 homolog [Parasteatoda tepidariorum]
5409	ctl	XP_015924694.1	122.479	ras-related protein Rab-30 [Parasteatoda tepidariorum]
5409	ctl	XP_015918908.1	122.479	ras-related protein Rab-30-like [Parasteatoda tepidariorum]
5422	ctl	XP_015931261.1	98.5969	asparagine--tRNA ligase, cytoplasmic [Parasteatoda tepidariorum]
5422	ctl	XP_015916536.1	98.5969	asparagine--tRNA ligase, cytoplasmic-like [Parasteatoda tepidariorum]
5432	paralogs	XP_021002678.1	66.2402	actin-binding LIM protein 2 [Parasteatoda tepidariorum]
5468	ctl	XP_021003689.1	164.851	E3 ubiquitin-protein ligase CBL-B-A-like [Parasteatoda tepidariorum]
5471	ctl	XP_015918316.1	63.929	CXXC-type zinc finger protein 1-like [Parasteatoda tepidariorum]
5471	ctl	XP_021000750.1	68.5514	DNA (cytosine-5)-methyltransferase PliMCI [Parasteatoda tepidariorum]
5471	ctl	XP_015923514.1	123.25	jmjC domain-containing histone demethylation protein 1-like isoform X3 [Parasteatoda tepidariorum]
5471	ctl	XP_021003616.1	123.25	jmjC domain-containing histone demethylation protein 1-like isoform X3 [Parasteatoda tepidariorum]
5471	ctl	XP_021003614.1	123.25	lysine-specific demethylase 2A-like isoform X1 [Parasteatoda tepidariorum]
5472	ctl	XP_015919134.1	108.612	derlin-2 [Parasteatoda tepidariorum]
5489	ctl	XP_015924111.1	171.785	60S ribosomal protein L3 [Parasteatoda tepidariorum]
5507	ctl	XP_015912369.2	132.88	DEP domain-containing protein 5 [Parasteatoda tepidariorum]
5526	ctl	XP_021001404.1	94.7449	secretin receptor isoform X1 [Parasteatoda tepidariorum]
5535	ctl	XP_015928652.1	184.496	40S ribosomal protein S8 [Parasteatoda tepidariorum]
5544	paralogs	XP_021001721.1	75.8702	polyadenylate-binding protein 4-like [Parasteatoda tepidariorum]
5544	paralogs	XP_015911780.1	75.8702	polyadenylate-binding protein 4-like isoform X1 [Parasteatoda tepidariorum]
5545	ctl	XP_015919092.1	82.0333	dihydrolipoyllysine-residue acetyltransferase component 1 of pyruvate dehydrogenase complex, mitochondrial-like [Parasteatoda tepidariorum]
5545	ctl	XP_015928646.1	138.272	dihydrolipoyllysine-residue acetyltransferase component of pyruvate dehydrogenase complex, mitochondrial-like isoform X1 [Parasteatoda tepidariorum]
5557	same as 5558	XP_015924758.1	117.087	exportin-7 isoform X1 [Parasteatoda tepidariorum]
5558	ctl	XP_015924758.1	114.005	exportin-7 isoform X1 [Parasteatoda tepidariorum]
5578	ctl	XP_021001564.1	138.272	unconventional myosin-Ia-like [Parasteatoda tepidariorum]
5581	ctl	XP_015912168.1	102.064	F-BAR domain only protein 2 isoform X1 [Parasteatoda tepidariorum]
5582	same as 5583	XP_021004384.1	154.836	coatomer subunit alpha-like [Parasteatoda tepidariorum]
5583	ctl	XP_021004384.1	176.407	coatomer subunit alpha-like [Parasteatoda tepidariorum]
5583	ctl	XP_021000621.1	69.707	coatomer subunit beta'-like [Parasteatoda tepidariorum]
5583	ctl	XP_015905363.1	71.633	lissencephaly-1 homolog isoform X1 [Parasteatoda tepidariorum]
5584	same as 5583	XP_021004384.1	126.331	coatomer subunit alpha-like [Parasteatoda tepidariorum]
5586	same as 5583	XP_015908549.2	127.872	coatomer subunit alpha-like [Parasteatoda tepidariorum]
5588	ctl	XP_015914049.1	113.235	splicing factor 3B subunit 2-like [Parasteatoda tepidariorum]
5588	ctl	XP_021003764.1	128.642	splicing factor 3B subunit 2-like isoform X1 [Parasteatoda tepidariorum]
5589	same as 4861	XP_015913004.1	119.783	chromodomain-helicase-DNA-binding protein Mi-2 homolog isoform X1 [Parasteatoda tepidariorum]
5589	ctl	XP_015904598.1	64.6994	nucleosome-remodeling factor subunit BPTF [Parasteatoda tepidariorum]
5590	same as 5591	XP_015930014.1	127.872	tyrosine-protein phosphatase non-receptor type 11 isoform X1 [Parasteatoda tepidariorum]
5591	ctl	XP_015930014.1	149.828	tyrosine-protein phosphatase non-receptor type 11 isoform X1 [Parasteatoda tepidariorum]
5593	paralogs	XP_015930014.1	93.5893	tyrosine-protein phosphatase non-receptor type 11 isoform X1 [Parasteatoda tepidariorum]
5627	paralogs	XP_015911817.1	84.7297	protein kinase C and casein kinase substrate in neurons protein 2 isoform X3 [Parasteatoda tepidariorum]
5641	same as 1584	XP_015929997.1	113.62	protein argonaute-2-like isoform X1 [Parasteatoda tepidariorum]
5646	ctl	XP_021002997.1	125.946	40S ribosomal protein S15-like [Parasteatoda tepidariorum]
5657	ctl	XP_015913033.1	108.997	roquin-1-like [Parasteatoda tepidariorum]
5690	paralogs	XP_015923059.1	125.946	F-box/SPRY domain-containing protein 1-like isoform X1 [Parasteatoda tepidariorum]
5690	paralogs	XP_015924464.1	73.1738	importin subunit alpha-3 [Parasteatoda tepidariorum]
5691	ctl	XP_015917345.1	98.9821	probable signal peptidase complex subunit 2 [Parasteatoda tepidariorum]
5692	ctl	XP_015927616.1	139.043	DCN1-like protein 1 [Parasteatoda tepidariorum]
5700	ctl	XP_015909466.1	103.99	cyclin-Y-like protein 1 [Parasteatoda tepidariorum]
5710	ctl	XP_015910626.1	109.768	casein kinase II subunit beta [Parasteatoda tepidariorum]
5724	ctl	XP_015917831.1	120.553	mitotic checkpoint protein BUB3 [Parasteatoda tepidariorum]
5725	ctl	XP_015907893.1	150.984	transmembrane emp24 domain-containing protein eca-like [Parasteatoda tepidariorum]
5762	ctl	XP_015910050.1	108.997	piezo-type mechanosensitive ion channel component-like [Parasteatoda tepidariorum]
5774	ctl	XP_015908823.1	92.4337	transmembrane 9 superfamily member 3 [Parasteatoda tepidariorum]
5785	ctl	XP_021004607.1	114.775	tyrosine-protein kinase SYK-like [Parasteatoda tepidariorum]
5787	paralogs	XP_015922717.1	64.6994	ephrin type-B receptor 1-B isoform X1 [Parasteatoda tepidariorum]
5787	paralogs	XP_015910921.1	65.855	inactive tyrosine-protein kinase transmembrane receptor ROR1-like [Parasteatoda tepidariorum]
5787	paralogs	XP_015921742.1	63.929	inactive tyrosine-protein kinase transmembrane receptor ROR1-like, partial [Parasteatoda tepidariorum]
5787	paralogs	XP_015904392.1	64.6994	insulin-like growth factor 1 receptor [Parasteatoda tepidariorum]
5787	paralogs	XP_021004607.1	84.3445	tyrosine-protein kinase SYK-like [Parasteatoda tepidariorum]
5787	paralogs	XP_021001542.1	63.929	tyrosine-protein kinase transmembrane receptor Ror [Parasteatoda tepidariorum]
5789	paralogs	XP_021002343.1	150.599	spectrin beta chain [Parasteatoda tepidariorum]
5789	paralogs	XP_021003038.1	135.576	spectrin beta chain, partial [Parasteatoda tepidariorum]
5815	paralogs	XP_015916075.2	141.739	V-type proton ATPase 116 kDa subunit a isoform X1 [Parasteatoda tepidariorum]
5815	paralogs	XP_015919742.1	93.5893	V-type proton ATPase 116 kDa subunit a-like isoform X1 [Parasteatoda tepidariorum]
5817	ctl	XP_015923601.2	88.9669	mucin-17-like [Parasteatoda tepidariorum]
5822	ctl	XP_015920607.1	97.8265	splicing factor U2AF 26 kDa subunit-like [Parasteatoda tepidariorum]
5826	ctl	XP_015907621.1	147.902	pituitary homeobox x isoform X1 [Parasteatoda tepidariorum]
5826	ctl	XP_015906051.1	134.42	pituitary homeobox x-like isoform X1 [Parasteatoda tepidariorum]
5826	ctl	XP_021002622.1	134.42	pituitary homeobox x-like isoform X2 [Parasteatoda tepidariorum]
5845	ctl	XP_015905673.1	80.1073	ubiquitin domain-containing protein UBFD1 [Parasteatoda tepidariorum]
5866	ctl	XP_021000762.1	88.5817	inositol monophosphatase 1 [Parasteatoda tepidariorum]
5870	ctl	XP_015929815.1	77.7962	5-oxoprolinase [Parasteatoda tepidariorum]
5895	ctl	XP_015926243.1	127.872	multiple PDZ domain protein-like [Parasteatoda tepidariorum]
5896	ctl	XP_015923022.1	80.1073	protein Red [Parasteatoda tepidariorum]
